# Supplementary material for: Quality improvement interventions to prevent the use of hospital services among nursing home residents: protocol for a systematic review and meta-analysis
Source: PubMed Central journal article supplement — BMJ Open. 2023 Sep 27;13(9):e074684. doi: 10.1136/bmjopen-2023-074684 (PMC10537830; doi:10.1136/bmjopen-2023-074684), 2023-09-27
Supplement: bmjopen-2023-074684.draft_revisions.pdf [file bmjopen-2023-074684.draft_revisions.pdf]

# BMJ Open

BMJ Open is committed to open peer review. As part of this commitment we make the peer review history of every article we publish publicly available.

When an article is published we post the peer reviewers' comments and the authors' responses online. We also post the versions of the paper that were used during peer review. These are the versions that the peer review comments apply to.

The versions of the paper that follow are the versions that were submitted during the peer review process. They are not the versions of record or the final published versions. They should not be cited or distributed as the published version of this manuscript.

BMJ Open is an open access journal and the full, final, typeset and author-corrected version of record of the manuscript is available on our site with no access controls, subscription charges or pay-per-view fees (<http://bmjopen.bmj.com>).

If you have any questions on BMJ Open's open peer review process please email [info.bmjopen@bmj.com](mailto:info.bmjopen@bmj.com)

# BMJ Open

## Quality improvement interventions to prevent hospital services use among nursing home residents: protocol for a systematic review and meta-analysis

|                               |                                                                                                                                                                                                                                                                                                                                                                                                                                                                                                                                                                                                                                                                                              |
|-------------------------------|----------------------------------------------------------------------------------------------------------------------------------------------------------------------------------------------------------------------------------------------------------------------------------------------------------------------------------------------------------------------------------------------------------------------------------------------------------------------------------------------------------------------------------------------------------------------------------------------------------------------------------------------------------------------------------------------|
| Journal:                      | <i>BMJ Open</i>                                                                                                                                                                                                                                                                                                                                                                                                                                                                                                                                                                                                                                                                              |
| Manuscript ID                 | bmjopen-2023-074684                                                                                                                                                                                                                                                                                                                                                                                                                                                                                                                                                                                                                                                                          |
| Article Type:                 | Protocol                                                                                                                                                                                                                                                                                                                                                                                                                                                                                                                                                                                                                                                                                     |
| Date Submitted by the Author: | 13-Apr-2023                                                                                                                                                                                                                                                                                                                                                                                                                                                                                                                                                                                                                                                                                  |
| Complete List of Authors:     | Basso, Ines; Università degli Studi del Piemonte Orientale Amedeo Avogadro, Department of Medicina Traslazionale<br>Gonella, Silvia; Azienda Ospedaliero Universitaria Citta della Salute e della Scienza di Torino<br>Bassi, Erika; Università degli Studi del Piemonte Orientale Amedeo Avogadro, Department of Medicina Traslazionale<br>Caristia, Silvia; Università degli Studi del Piemonte Orientale Amedeo Avogadro, Department of Medicina Traslazionale<br>Campagna, Sara; Università degli Studi di Torino, Department of Public Health and Pediatrics<br>Dal Molin, Alberto; Università degli Studi del Piemonte Orientale Amedeo Avogadro, Department of Medicina Traslazionale |
| Keywords:                     | Systematic Review, Aging, Hospitalization, Change management < HEALTH SERVICES ADMINISTRATION & MANAGEMENT, Nursing Care                                                                                                                                                                                                                                                                                                                                                                                                                                                                                                                                                                     |
|                               |                                                                                                                                                                                                                                                                                                                                                                                                                                                                                                                                                                                                                                                                                              |

SCHOLARONE™  
Manuscripts

1  
2  
3  
4  
5  
6  
7  
8  
9  
10  
11  
12  
13  
14  
15  
16  
17  
18  
19  
20  
21  
22  
23  
24  
25  
26  
27  
28  
29  
30  
31  
32  
33  
34  
35  
36  
37  
38  
39  
40  
41  
42  
43  
44  
45  
46  
47  
48  
49  
50  
51  
52  
53  
54  
55  
56  
57  
58  
59  
60

**Title:** Quality improvement interventions to prevent hospital services use among nursing home residents: protocol for a systematic review and meta-analysis

**Authors:**

Ines Basso<sup>1,2\*</sup>, [ines.basso@uniupo.it](mailto:ines.basso@uniupo.it)

Silvia Gonella<sup>3</sup>, [silvia.gonella@unito.it](mailto:silvia.gonella@unito.it)

Erika Bassi<sup>1</sup>, [erika.bassi@uniupo.it](mailto:erika.bassi@uniupo.it)

Silvia Caristia<sup>1</sup>, [silvia.caristia@med.uniupo.it](mailto:silvia.caristia@med.uniupo.it)

Sara Campagna<sup>4#</sup>, [sara.campagna@unito.it](mailto:sara.campagna@unito.it)

and

Alberto Dal Molin<sup>1#</sup>, [alberto.dalmolin@med.uniupo.it](mailto:alberto.dalmolin@med.uniupo.it)

**Affiliations:**

<sup>1</sup> Università degli Studi del Piemonte Orientale Amedeo Avogadro, Department of Medicina Traslazionale, Novara, Piemonte, IT

<sup>2</sup> Azienda Ospedaliera Nazionale SS Antonio e Biagio e C Arrigo, Department of Research, Training and Innovation Alessandria, Piemonte, IT

<sup>3</sup> Azienda Ospedaliero Universitaria Città della Salute e della Scienza di Torino Torino, Piemonte, IT

<sup>4</sup> Università degli Studi di Torino, Department of Public Health and Pediatrics Torino, Piemonte, IT

**\*Corresponding author: Ines Basso, [ines.basso@uniupo.it](mailto:ines.basso@uniupo.it)**

**<https://orcid.org/0000-0002-9283-236X>**

**#Sara Campagna and Alberto Dal Molin are co-last authors- They contributed equally to this work.**

## Abstract

**Introduction:** Quality improvement interventions are a promising strategy to reduce hospital services use among nursing home residents but evidence for their effectiveness is limited. It is unclear what characteristics of the quality improvement intervention and activities planned to facilitate implementation may promote fidelity to organizational and system changes. The aim of this systematic review and meta-analysis will be to assess the effectiveness of quality improvement interventions and the implementation strategies aimed at reducing hospital services use among nursing home residents.

**Methods and analysis:** Medline, CINAHL, The Cochrane Library, Embase and Web of Science databases will be comprehensively searched. Eligible studies should focus on the implementation of a quality improvement intervention defined as the systematic, continuous approach that designs, tests, and implements changes using real-time measurement to reduce hospitalizations or emergency department visits among long-stay nursing home residents. Quality improvement details and implementation strategies will be deductively categorized into Effective Practice and Organisation of Care taxonomy's domains on delivery arrangements and implementation strategies. Quality and bias assessment will be completed through the Quality Improvement Minimum Quality Criteria Set and the Joanna Briggs Institute Critical Appraisal Tools.

Results will be pooled in a meta-analysis, using incidence risk ratio or rate to synthesize outcomes. Raw data will be requested from the authors, as needed. Heterogeneity will be assessed using the  $\chi^2$  test and the  $I^2$  statistics.

**Ethics and dissemination:** Ethical approval is not required. Results will be published in a peer-review journal and presented at (inter)national conferences.

**Prospero registration number:** CRD42022364195

1  
2  
3 51 **Keywords:** Systematic review, nursing homes, quality improvement, implementation science,  
4  
5 52 hospital admissions, emergency department visits  
6  
7  
8 53

9  
10 54 **Strengths and limitations of this study**  
11

- 12 55 • This is the first systematic review and meta-analysis of the effectiveness of QI improvement  
13  
14 56 intervention and implementation strategies in reducing hospital services use among nursing  
15  
16  
17 57 home residents.  
18  
19 58 • The protocol complies with the Preferred Reporting Items for Systematic Reviews and  
20  
21 59 Meta-analyses Protocol guideline.  
22  
23  
24 60 • A comprehensive search strategy has been developed to include all eligible studies that  
25  
26 61 match inclusion criteria.  
27  
28  
29 62 • The study screening, selection, data extraction and assessment of the risk of bias will be  
30  
31 63 completely by two independent reviewers.  
32  
33 64 • The diversity of quality improvement interventions and designs of included studies might  
34  
35 65 lead to a substantial heterogeneity among studies.  
36  
37  
38 66  
39  
40

41 67 **Introduction**  
42  
43

44 68 By 2050, the global population aged 80 or over is estimated to triple (1) and the demand for  
45  
46 69 Nursing Home (NH) services is expected to rise. Nursing Home residents have complex health  
47  
48  
49 70 needs and challenging medical situations (2,3) that lead to frequent hospitalizations (4–6). These  
50  
51 71 hospitalizations are costly and entail the risk of iatrogenic harms, including delirium, infections, and  
52  
53 72 loss of functional dependency (7). Moreover, international research suggests that up to 55% of  
54  
55 73 hospitalizations from NH can be potentially avoided with timely identification and management of  
56  
57 74 acute changes in health status (8). In fact, many conditions that result in admission or an emergency  
58  
59  
60 75 department visit, such as infections, exacerbation of chronic diseases, decreased food or fluid

1  
2  
3 76 intake, or functional decline could be prevented or effectively managed on-site (9,10). Quality  
4  
5 77 improvement (QI) intervention may be a promising strategy to improve care for NH residents and  
6  
7 78 prevent their hospitalizations (11–13). A QI intervention is defined as a systematic, continuous  
8  
9  
10 79 approach that design, test and implement changes using real-time measurement to improve safety,  
11  
12 80 effectiveness, and experience of care (14).

13  
14  
15 81 Quality improvement is usually designed as a multicomponent intervention to tackle an  
16  
17 82 improvement problem, involving all the organization providers, including front-line staff, and using  
18  
19 83 recognized methods to identify all potential causes of the problem and assess the impact of the  
20  
21 84 intervention against the expected results through reliable process and outcome measures (15).  
22  
23  
24 85 Quality improvement interventions rely on several implementation strategies to improve adaptation  
25  
26 86 and stakeholders' engagement, which may widely vary across projects and include, for example,  
27  
28 87 audit and feedback, staff education, tools, and site champions (11,16). Evidence about the effect of  
29  
30 88 different implementation strategies on the success of QI intervention is unclear.  
31  
32  
33

34  
35 89 To better describe the heterogeneity of the healthcare intervention, including QI research, the  
36  
37 90 Cochrane Effective Practice and Organization of Care (EPOC) group developed a taxonomy for  
38  
39 91 quality interventions based on the pragmatic descriptions of the components rather than theoretical  
40  
41 92 constructs (17). The EPOC taxonomy, which can be used as a framework for exploring the  
42  
43 93 intervention, includes four domains of interventions: delivery arrangements, financial arrangements,  
44  
45 94 governance arrangements, and implementation strategies, each of which is divided in categories and  
46  
47 95 subcategories (18).  
48  
49  
50

51 96 A QI approach has been widely used in the acute care setting, however evidence of effectiveness in  
52  
53 97 NH is still limited (19,20). Seeing the high frequency of hospitalizations of NH residents is pivotal  
54  
55 98 to understanding whether this strategy may help to prevent avoidable transfers. Compared to the  
56  
57 99 hospital setting, the long-term care context poses several challenges that could impede a smooth  
58  
59 100 implementation of a QI initiative (19,21,22). The long-term care context has multiple, unique,  
60

1  
2  
3 101 barriers at the organizational level including inner/internal barriers, for example, organizational  
4  
5 102 culture, leadership or learning climate and outer/external barriers, for example, organizational  
6  
7  
8 103 funding, law, and regulation, as well as at staff level (knowledge, skills, and motivation) (23).  
9

10  
11 104 The NH environment can be particularly challenging due to workforce shortages and high turnover  
12  
13 105 (24,25). Introducing a practice change that requires staff engagement in an under-resourced  
14  
15 106 organization may result in poor adherence to the intervention or in an unsuccessful program because  
16  
17  
18 107 of the lack of time (26). In addition, high staff turnover may lead to a continuous need to support  
19  
20 108 training and education in evidence-based practice and QI methods (22).  
21  
22

23 109 Another important factor that may influence the organization's readiness for change is leadership's  
24  
25 110 involvement in QI interventions (27). The extent to which management sustains and reinforces the  
26  
27  
28 111 cultural change, establishes a positive relationship with front-line staff, and invests resources in the  
29  
30 112 adoption of a new model of care, are crucial features for achieving a high standard of care (22,28).  
31  
32 113 However, NH management is often characterized by a vertical hierarchal structure that can hinder  
33  
34  
35 114 an open flow of communication and prevent all stakeholders to collaborate fruitfully (29).  
36  
37

38 115 To date, no secondary studies have investigated the effectiveness of QI interventions, by exploring  
39  
40 116 factors that can contribute to their success, such as delivery arrangements and implementation  
41  
42 117 strategies used. Therefore, the aim of the systematic review will be to evaluate the effects of QI  
43  
44  
45 118 interventions and the implementation strategies aimed at reducing hospitalizations among NH  
46  
47 119 residents and to provide an estimate of the effectiveness of QI interventions. The secondary aims  
48  
49 120 will be to assess the quality of the QI interventions and describe their delivery arrangements and  
50  
51  
52 121 implementation strategies.  
53

## 54 122 **Research questions**

56  
57  
58 123 What is the effectiveness of QI interventions and implementation strategies aimed at preventing  
59  
60 124 hospital service use for nursing home residents?

1  
2  
3 125 What is the quality of the QI interventions provided in Nursing Homes?  
4  
5

6 126 **Methods and analysis**  
7  
8

9 127 The protocol complies with the Preferred Reporting Items for Systematic Reviews and Meta-  
10  
11 128 analyses Protocol (PRISMA-P) 2015 statement for reporting (30) (Supplementary material). It has  
12  
13  
14 129 been registered in PROSPERO (CRD42022364195).  
15  
16

17 130 **Review conceptual model**  
18  
19

20 131 The review will be developed following the implementation research conceptual model proposed by  
21  
22 132 Proctor et al (31). According to the model (Figure 1), QI intervention strategies and implementation  
23  
24  
25 133 processes are separated but linked domains. For the purpose of this review, QI strategies are defined  
26  
27 134 as the organizational and system changes to reduce hospital services use. The implementation  
28  
29  
30 135 processes are the activities projected to transfer QI intervention strategies into clinical practice.  
31  
32 136 Both domains impact different but interrelated types of outcomes, implementation and residents'  
33  
34 137 outcomes. Implementation outcomes are used to assess fidelity in implementation strategies. The  
35  
36 138 objective of this review is to assess the effectiveness of the QI intervention strategies on hospital  
37  
38  
39 139 service use, assuming that this effect is mediated by implementation strategies and implementation  
40  
41 140 outcomes.  
42  
43

44 141 *Please insert Figure 1*  
45  
46

47 142 **Search strategy**  
48  
49

50 143 Three steps approaches will be used: 1) a preliminary search on PubMed will be conducted to  
51  
52  
53 144 identify keywords; 2) peer-reviewed publications will be sought in Medline, CINAHL, The  
54  
55 145 Cochrane Library, Embase and Web of Science databases; grey literature will be excluded; 3) The  
56  
57 146 reference list of all eligible studies will be hand-searched for additional papers.  
58  
59  
60



1  
2  
3 147 The search strategy has been developed with the collaboration of a librarian; it combines controlled  
4  
5 148 vocabulary and text words, with title and abstract field limiters, since 2000, as no QI has been  
6  
7  
8 149 undertaken before this date (23). No language limits have been applied. The full search strategy is  
9  
10 150 available as supplementary material.

11  
12  
13 151 Based on a recent international survey (32), an extensive list of terms referring to “nursing homes”  
14  
15 152 has been included.

16  
17  
18  
19 153 For the intervention concept, search terms which focus on “Quality improvement” or  
20  
21 154 “Organizational innovation” or “Quality Assurance, Health Care” or “Management Quality  
22  
23 155 Circles”, or on a formal model of QI intervention have been used (Plan Do Study Act (PDSA); Six  
24  
25 156 Sigma (DMAIC and DMADV); Total Quality Management (TQM), Continuous Quality  
26  
27  
28 157 Improvement (CQI), Focus Analyze Develop Execute (FADE)) (33). Moreover, terms concerning  
29  
30 158 implementation strategies have been used, including “Implementation Science”, “Program  
31  
32 159 Implementation”, or “Diffusion of Innovation”. When complex interventions are introduced in a  
33  
34  
35 160 real-world context with the goal of changing health care professionals’ behaviours, the  
36  
37 161 implementation phase needs to be developed and planned along with the intervention itself (34).

#### 40 162 **Eligibility criteria**

41  
42  
43 163 The review’s eligibility criteria will be identified based on the following elements of the PICO  
44  
45 164 framework:

46  
47  
48  
49 165 *Types of participants/setting:* Long-stay nursing home residents, defined as persons who have been  
50  
51 166 institutionalised for at least 30 days. Residences needing short-term NH or rehabilitation services  
52  
53 167 will be excluded. Studies that recruited mixed populations (short- and long-residents) that did not  
54  
55  
56 168 present stratified results, as well as those undertaken in multiple settings (i.e., NHs, acute care  
57  
58 169 hospitals, home health agencies) and no opportunity to detect the impact of the QI in NH will be  
59  
60 170 excluded. Nursing homes will be defined as facilities that provide nursing care for people with

1  
2  
3  
4  
5  
6  
7  
8  
9  
10  
11  
12  
13  
14  
15  
16  
17  
18  
19  
20  
21  
22  
23  
24  
25  
26  
27  
28  
29  
30  
31  
32  
33  
34  
35  
36  
37  
38  
39  
40  
41  
42  
43  
44  
45  
46  
47  
48  
49  
50  
51  
52  
53  
54  
55  
56  
57  
58  
59  
60

171 functional or cognitive disabilities and assist them with activities of daily living, with the aim to  
172 provide a safe and supportive environment (35). Studies conducted in facilities providing  
173 accommodation, without nurses on-site will be excluded.

174 Intervention(s): the review will include studies focused on the implementation of QI interventions  
175 aimed at reducing hospital services use among NH residents. The Academy of Medical Royal  
176 Colleges' definition of QI will be used (14). Collaborative QI interventions will be also included  
177 due to the importance of the model in the healthcare setting (36).

178 Empirical studies will be included if they: 1) report measurable continuous local iterative testing of  
179 solutions; 2) use real data in guiding the change; 2) obtain a practical contextual knowledge 3)  
180 encompass at least one implementation strategy developed by the EPOC taxonomy of interventions  
181 targeted healthcare workers (e.g., distribution of educational materials, educational meetings,  
182 clinical practice guidelines, overcoming challenges to improving quality, local opinion leaders, etc)  
183 (18) . These studies may or may not use a formal model (PDSA, Six Sigma, TQM, etc.) or a  
184 framework for improvement.

185 Alternatives to QI strategies, such as research (studies aim to produce generalizable knowledge,  
186 testing a hypothesis, though a rigorous method), service evaluation (aims to assess current patient  
187 care) or clinical transformation (radical or deep transformation activity without the iterative test of  
188 change will be excluded (37).

189 *Types of comparison(s):* studies must have a control group that does not receive any QI  
190 interventions or a historical cohort with which to compare changes before and after the intervention.

191 Types of outcomes: the outcomes of the review will be hospital services use. In the specific, the  
192 primary outcome will be the all-cause hospitalizations, while the secondary outcomes will be  
193 hospitalizations at the end of life, potentially avoidable hospitalizations (8), ED visits (the following

1  
2  
3  
4  
5  
6  
7  
8  
9  
10  
11  
12  
13  
14  
15  
16  
17  
18  
19  
20  
21  
22  
23  
24  
25  
26  
27  
28  
29  
30  
31  
32  
33  
34  
35  
36  
37  
38  
39  
40  
41  
42  
43  
44  
45  
46  
47  
48  
49  
50  
51  
52  
53  
54  
55  
56  
57  
58  
59  
60

194 terms will be considered interchangeably “ED transfers” or “ED attendances” or “ED presentations”  
195 or “Unplanned transfers”), and readmissions.

196 *Type of study designs:* Randomized Controlled Trials (RCTs), Non-Randomised Controlled Trials  
197 (NRCTs), Uncontrolled Before- and- After trials (UBA) or Interrupted Time Series (ITS) designed  
198 with at least three data points before and three after the intervention.

### 199 **Selecting studies**

200 Two reviewers (I.B. and S.G.) will perform the screening process to determine potential eligibility  
201 independently. Zotero will be used as reference manager software. As the first step, the title and  
202 abstract will be evaluated; then the full text of the potentially eligible studies will be examined for  
203 compliance with eliciting criteria. Any disagreement will be resolved by a third author (AD).

### 205 **Risk-of-bias assessment**

206 Two independent reviewers will assess the Risk of Bias of the studies included in the review  
207 following the JBI Critical Appraisal Tools, based on study design (38). These tools provide a set of  
208 questions, which reviewers can answer with yes (i.e., criterion met), no (i.e., a criterion not met),  
209 unclear or not applicable. No studies will be excluded by the methodological quality assessment.

### 210 **Appraisal of the quality of QI interventions**

211 The quality of the QI interventions will be appraised for each included study using the QI Minimum  
212 Quality Criteria Set (QI-MQCS) to inform the transferability of the best evidence into clinical  
213 practice (39). The QI-MQCS addresses the following core QI domains: Organizational Motivation,  
214 Intervention Rationale, Intervention Description, Organizational Characteristics, Implementation,  
215 Study Design, Comparator, Data Source, Timing, Adherence/Fidelity, Health Outcomes,  
216 Organisational Readiness, Penetration/Reach, Sustainability, Spread and Limitations.

### 217 **Data extraction**

218 The following study characteristics will be independently extracted by two members (IB and SG) of  
219 the research team:

- 220 - Study details: study design, date of publication, participants (NH organizational  
221 characteristics, ownership, size, etc), study setting.
- 222 - QI intervention details: characteristics and implementation strategies, data on the formal  
223 model used (if any), and information to appraise the quality of the QI interventions  
224 (description of organizational problem, reason or motivation for the intervention,  
225 intervention description, basic characteristics of the organization, etc) were extracted.
- 226 - Hospital services use .

### 228 **Data synthesis**

229 Data from the included studies will be combined in a meta-analysis, based on the outcome. Results  
230 will be pooled by combining the natural logarithms of the rate ratio across studies or calculating the  
231 rate ratio using the generic inverse-variance method. Heterogeneity will be assessed using the  $\chi^2$  test  
232 and the  $I^2$  statistics:  $I^2 \leq 50\%$  indicates low heterogeneity and  $>50\%$  high heterogeneity. Subgroup  
233 analysis will be conducted according to the characteristic of the population and the type of QI  
234 intervention and implementation strategies, if the number of included studies allows it.

235 Publication bias will be visually evaluated using funnel plot if the number of included studies will  
236 be higher than 10. Whether measure outcomes reported in the included studies will be not  
237 homogeneous, raw data will be requested from the authors. All the analysis will be performed using  
238 STATA/SE17 version.

1  
2  
3 239 Moreover, a narrative synthesis will be arranged. The characteristics of the included studies will be  
4  
5 240 synthesized and compared in a table. The characteristic of the QI and the implementation strategies  
6  
7  
8 241 will be deductively categorized into the EPOC taxonomy's domains on delivery arrangements and  
9  
10 242 implementation strategies, using all the subcategories (18). The domains of governance  
11  
12 243 arrangements and financial arrangements will be excluded because beyond the scope of the review.  
13  
14

## 15 244 **Discussion**

17  
18 245 Hospital services use is on the rise and associated with health risk for older NH residents. Growing  
19  
20  
21 246 evidence suggest that QI intervention may reduce potentially avoidable transfers among NH  
22  
23 247 residents. The systematic review and meta-analysis will support clinical and organizational  
24  
25 248 decision-making, by identifying what strategies of QI intervention prevent the use of hospital  
26  
27  
28 249 services and what implementation strategies are more effective in promoting fidelity to  
29  
30 250 organisational and system changes.  
31  
32

## 33 251 **References**

- 34  
35  
36 252 1. World Health Organization. Ageing. 2021. [https://www.who.int/health-topics/ageing#tab=tab\\_1](https://www.who.int/health-topics/ageing#tab=tab_1).  
37  
38 253 Accessed 26 Dec 2022.  
39  
40 254 2. Sverdrup K, Bergh S, Selbæk G, Benth JS, Røen IM, Husebo B, Tangen GG. Trajectories of physical  
41  
42 255 performance in nursing home residents with dementia. *Aging Clin Exp Res*. 2020 Dec;32(12):2603-2610.  
43  
44 256 doi: 10.1007/s40520-020-01499-y.  
45  
46  
47 257 3. Li S, Middleton A, Ottenbacher KJ, Goodwin JS. Trajectories Over the First Year of Long-Term  
48  
49 258 Care Nursing Home Residence. *J Am Med Dir Assoc*. 2018 Apr;19(4):333-341. doi:  
50  
51 259 10.1016/j.jamda.2017.09.021.  
52  
53 260 4. Kirsebom M, Hedström M, Wadensten B, Pöder U. The frequency of and reasons for acute hospital  
54  
55 261 transfers of older nursing home residents. *Arch Gerontol Geriatr*. 2014 Jan-Feb;58(1):115-20. doi:  
56  
57 262 10.1016/j.archger.2013.08.002.  
58  
59  
60

1  
2  
3  
4  
5  
6  
7  
8  
9  
10  
11  
12  
13  
14  
15  
16  
17  
18  
19  
20  
21  
22  
23  
24  
25  
26  
27  
28  
29  
30  
31  
32  
33  
34  
35  
36  
37  
38  
39  
40  
41  
42  
43  
44  
45  
46  
47  
48  
49  
50  
51  
52  
53  
54  
55  
56  
57  
58  
59  
60

- 263 5. Simo N, Cesari M, Tchiero H, Rolland Y, de Souto Barreto P, Dartigues JF, Vellas B, Tabue-Teguo  
264 M. Frailty Index, Hospital Admission and Number of Days Spent in Hospital in Nursing Home Residents:  
265 Results from the Incur Study. *J Nutr Health Aging*. 2021;25(2):155-159. doi: 10.1007/s12603-020-1561-7.
- 266 6. Hoffmann F, Allers K. Age and sex differences in hospitalisation of nursing home residents: a  
267 systematic review. *BMJ Open*. 2016 Oct 8;6(10):e011912. doi: 10.1136/bmjopen-2016-011912. .
- 268 7. Dwyer R, Gabbe B, Stoelwinder JU, Lowthian J. A systematic review of outcomes following  
269 emergency transfer to hospital for residents of aged care facilities. *Age Ageing*. 2014 Nov;43(6):759-66. doi:  
270 10.1093/ageing/afu117.
- 271 8. Lemoyne SE, Herbots HH, De Blick D, Remmen R, Monsieurs KG, Van Bogaert P. Appropriateness  
272 of transferring nursing home residents to emergency departments: a systematic review. *BMC Geriatr*. 2019  
273 Jan 21;19(1):17. doi: 10.1186/s12877-019-1028-z.
- 274 9. Ouslander JG, Lamb G, Perloe M, Givens JH, Kluge L, Rutland T, Atherly A, Saliba D. Potentially  
275 avoidable hospitalizations of nursing home residents: frequency, causes, and costs: [see editorial comments  
276 by Drs. Jean F. Wyman and William R. Hazzard, pp 760-761]. *J Am Geriatr Soc*. 2010 Apr;58(4):627-35.  
277 doi: 10.1111/j.1532-5415.2010.02768.x.
- 278 10. Frick J, Möckel M, Muller R, Searle J, Somasundaram R, Slagman A. Suitability of current  
279 definitions of ambulatory care sensitive conditions for research in emergency department patients: a  
280 secondary health data analysis. *BMJ Open*. 2017 Oct 22;7(10):e016109. doi: 10.1136/bmjopen-2017-  
281 016109.
- 282 11. Toles M, Colón-Emeric C, Moreton E, Frey L, Leeman J. Quality improvement studies in nursing  
283 homes: a scoping review. *BMC Health Serv Res*. 2021 Aug 12;21(1):803. doi: 10.1186/s12913-021-06803-8
- 284 12. Mileski M, Topinka JB, Lee K, Brooks M, McNeil C, Jackson J. An investigation of quality  
285 improvement initiatives in decreasing the rate of avoidable 30-day, skilled nursing facility-to-hospital  
286 readmissions: a systematic review. *Clin Interv Aging*. 2017 Jan 25;12:213-222. doi: 10.2147/CIA.S123362.
- 287 13. Chadborn NH, Devi R, Hinsliff-Smith K, Banerjee J, Gordon AL. Quality improvement in long-term  
288 care settings: a scoping review of effective strategies used in care homes. *Eur Geriatr Med*. 2021  
289 Feb;12(1):17-26. doi: 10.1007/s41999-020-00389-w.

- 1  
2  
3 290 14. Academy of Medical Royal Collages. Quality Improvement-training for better outcomes.  
4  
5 291 2016.[https://www.aomrc.org.uk/content/uploads/2016/06/Quality\\_improvement\\_training\\_better\\_outcomes\\_1](https://www.aomrc.org.uk/content/uploads/2016/06/Quality_improvement_training_better_outcomes_1)  
6  
7 292 40316-2.pdf. Accessed 02 Apr 2022.  
8  
9 293 15. The Health Foundation. Quality improvement made simple.  
10  
11 294 2021<https://www.health.org.uk/publications/quality-improvement-made-simple>. Accessed 12 Apr 2022.  
12  
13 295 16. Woo K, Milworm G, Dowding D. Characteristics of Quality Improvement Champions in Nursing  
14  
15 Homes: A Systematic Review With Implications for Evidence-Based Practice. *Worldviews Evid Based*  
16 296 *Nurs*. 2017 Dec;14(6):440-446. doi: 10.1111/wvn.12262  
17  
18 297  
19 298 17. Grimshaw J, McAuley LM, Bero LA, Grilli R, Oxman AD, Ramsay C, Vale L, Zwarenstein M.  
20  
21 Systematic reviews of the effectiveness of quality improvement strategies and programmes. *Qual Saf Health*  
22 299 *Care*. 2003 Aug;12(4):298-303. doi: 10.1136/qhc.12.4.298.  
23  
24 300  
25 301 18. Effective Practice and Organisation of Care (EPOC). EPOC Taxonomy-topics list Delivery  
26  
27 Arrangements. [epoc.cochrane.org/epoc-taxonomy](http://epoc.cochrane.org/epoc-taxonomy). Accessed 02 Mar 2022.  
28  
29 302  
30 303 19. Levy C, Au D, Ozkaynak M. Innovation and Quality Improvement: Safe or Sabotage in Nursing  
31  
32 Homes? *J Am Med Dir Assoc*. 2021 Aug;22(8):1670-1671. doi: 10.1016/j.jamda.2021.06.026. PMID:  
33 304 34334162.  
34  
35 305  
36 306 20. Alexander JA, Hearld LR. What can we learn from quality improvement research? A critical review  
37  
38 of research methods. *Med Care Res Rev*. 2009 Jun;66(3):235-71. doi: 10.1177/1077558708330424.  
39 307  
40  
41 308 21. Ouslander JG, Reyes B, Yang Z, Engstrom G, Tappen R, Newman D, Huckfeldt PJ. Nursing home  
42  
43 309 performance in a trial to reduce hospitalizations: Implications for future trials. *J Am Geriatr Soc*. 2021  
44  
45 310 Aug;69(8):2316-2326. doi: 10.1111/jgs.17231.  
46  
47 311 22. Rantz MJ, Zwiygart-Stauffacher M, Flesner M, Hicks L, Mehr D, Russell T, Minner D. Challenges of  
48  
49 312 using quality improvement methods in nursing homes that "need improvement". *J Am Med Dir Assoc*. 2012  
50  
51 313 Oct;13(8):732-8. doi: 10.1016/j.jamda.2012.07.008.  
52  
53 314 23. Kaplan HC, Brady PW, Dritz MC, Hooper DK, Linam WM, Froehle CM, Margolis P. The influence  
54  
55 of context on quality improvement success in health care: a systematic review of the literature. *Milbank Q*.  
56 315 2010 Dec;88(4):500-59. doi: 10.1111/j.1468-0009.2010.00611.x  
57  
58 316  
59  
60

1  
2  
3  
4  
5  
6  
7  
8  
9  
10  
11  
12  
13  
14  
15  
16  
17  
18  
19  
20  
21  
22  
23  
24  
25  
26  
27  
28  
29  
30  
31  
32  
33  
34  
35  
36  
37  
38  
39  
40  
41  
42  
43  
44  
45  
46  
47  
48  
49  
50  
51  
52  
53  
54  
55  
56  
57  
58  
59  
60

24. Mills WL, Pimentel CB, Snow AL, Allen RS, Wewiorski NJ, Palmer JA, Clark V, Roland TM, McDannold SE, Hartmann CW. Nursing Home Staff Perceptions of Barriers and Facilitators to Implementing a Quality Improvement Intervention. *J Am Med Dir Assoc*. 2019 Jul;20(7):810-815. doi: 10.1016/j.jamda.2019.01.139.
25. Palmer JA, Parker VA, Mor V, Volandes AE, Barre LR, Belanger E, Carter P, Loomer L, McCreedy E, Mitchell SL. Barriers and facilitators to implementing a pragmatic trial to improve advance care planning in the nursing home setting. *BMC Health Serv Res*. 2019 Jul 29;19(1):527. doi: 10.1186/s12913-019-4309-5.
26. Gagnon MM, Hadjistavropoulos T, Williams J. Development and mixed-methods evaluation of a pain assessment video training program for long-term care staff. *Pain Res Manag*. 2013 Nov-Dec;18(6):307-12. doi: 10.1155/2013/659320.
27. Scoville R, Little K, Rakover J, Luther K, Mate K. Sustaining Improvement. IHI White Paper. Cambridge. 2016. <https://www.ih.org>. Accessed 15 Feb 2022.
28. Hickman SE, Miech EJ, Stump TE, Fowler NR, Unroe KT. Identifying the Implementation Conditions Associated With Positive Outcomes in a Successful Nursing Facility Demonstration Project. *Gerontologist*. 2020 Nov 23;60(8):1566-1574. doi: 10.1093/geront/gnaa041
29. Wicke D, Coppin R, Payne S. Teamworking in nursing homes. *J Adv Nurs*. 2004 Jan;45(2):197-204. doi: 10.1046/j.1365-2648.2003.02881.x.
30. Moher D, Shamseer L, Clarke M, Ghersi D, Liberati A, Petticrew M, et al. Preferred reporting items for systematic review and meta-analysis protocols (PRISMA-P) 2015 statement. 2015. <http://www.crd.york.ac.uk/prospetro>. Accessed 4 Mar 4 2022.
31. Proctor EK, Landsverk J, Aarons G, Chambers D, Glisson C, Mittman B. Implementation research in mental health services: an emerging science with conceptual, methodological, and training challenges. *Adm Policy Ment Health*. 2009 Jan;36(1):24-34. doi: 10.1007/s10488-008-0197-4.
32. Burton JK, Quinn TJ, Gordon AL, MacLulich AMJ, Reynish EL, Shenkin SD. Identifying published studies of care home research: an international survey of researchers. *J Nurs Home Res Sci*. 2017. <https://www.jnursinghomeresearch.com/all-issues.html?article=150>. Accessed 15 May 2022



- 1  
2  
3 343 33. McPheeters ML, Sunil Kripalani M, Peterson NB, Idowu RT, Jerome RN, Shannon Potter MA, et al.  
4  
5 344 3. Quality Improvement Interventions To Address Health Disparities. 2012. [www.ahrq.gov](http://www.ahrq.gov) cite. Accessed  
6  
7 345 12 Feb 2022
- 8  
9 346 34. Skivington K, Matthews L, Simpson SA, Craig P, Baird J, Blazeby JM, Boyd KA, Craig N, French  
10 347 DP, McIntosh E, Petticrew M, Rycroft-Malone J, White M, Moore L. A new framework for developing and  
11 348 evaluating complex interventions: update of Medical Research Council guidance. *BMJ*. 2021 Sep  
12 349 30;374:n2061. doi: 10.1136/bmj.n2061.
- 13  
14 350 35. Sanford AM, Orrell M, Tolson D, Abbatecola AM, Arai H, Bauer JM, Cruz-Jentoft AJ, Dong B, Ga  
15 351 H, Goel A, Hajjar R, Holmerova I, Katz PR, Koopmans RT, Rolland Y, Visvanathan R, Woo J, Morley JE,  
16 352 Vellas B. An international definition for "nursing home". *J Am Med Dir Assoc*. 2015 Mar;16(3):181-4. doi:  
17 353 10.1016/j.jamda.2014.12.013.
- 18 354 36. Wells S, Tamir O, Gray J, Naidoo D, Bekhit M, Goldmann D. Are quality improvement  
19 355 collaboratives effective? A systematic review. *BMJ Qual Saf*. 2018 Mar;27(3):226-240. doi: 10.1136/bmjqs-  
20 356 2017-006926
- 21 357 37. Backhouse A, Ogunlayi F. Quality improvement into practice. *BMJ*. 2020 Mar 31;368:m865. doi:  
22 358 10.1136/bmj.m865.
- 23 359 38. Tufanaru C MZAECJHL. Chapter 3: Systematic reviews of effectiveness. In: Aromataris E, Munn Z  
24 360 (Editors). *JBIManual for Evidence Synthesis*. JBI. 2020. <https://synthesismanual.jbi.global> Accessed 20 Jan  
25 361 2023.
- 26 362 39. Hempel S, Shekelle PG, Liu JL, Sherwood Danz M, Foy R, Lim YW, Motala A, Rubenstein LV.  
27 363 Development of the Quality Improvement Minimum Quality Criteria Set (QI-MQCS): a tool for critical  
28 364 appraisal of quality improvement intervention publications. *BMJ Qual Saf*. 2015 Dec;24(12):796-804. doi:  
29 365 10.1136/bmjqs-2014-003151.
- 30  
31  
32  
33  
34  
35  
36  
37  
38  
39  
40  
41  
42  
43  
44  
45  
46  
47  
48  
49  
50  
51  
52  
53  
54  
55 367 **Contributors:** IB, ADM, SC, SG, EB, and SC jointly contributed to the study aims, research design  
56  
57 368 and methodology. IB, SG, SC and EB produced the first draft of the article outline with the  
58  
59 369 guidance of SC, and ADM. IB and EB designed the search strategy. All authors (IB, ADM, SC, SG,  
60

1  
2  
3 370 SC, EB) contributed substantially to the manuscript and critically revised the content. All authors  
4  
5 371 read and approved the final version of the manuscript.  
6  
7

8  
9 372 **Funding:** The study was partially funded by the Italian Ministry of University and Research  
10  
11 373 program "Dipartimenti di Eccellenza 2023-2027", AGING Project – Department of Translational  
12  
13 374 Medicine, Università del Piemonte Orientale  
14  
15

16  
17 375 **Competing interests:** None declared  
18  
19

20 376 **Patient and public involvement:** Patients and/or the public were not involved in this research's  
21  
22 377 design, conduct, reporting, or dissemination plans.  
23  
24

25 378 **Patient consent for publication:** Not applicable.  
26  
27

28 379 **Acknowledgements:** The authors would like to thank Ms Maoret Roberta of the Biblioteca Virtuale  
29  
30 380 per la Salute – Piemonte - for her support in the development of the search strategy.  
31  
32  
33  
34  
35  
36  
37  
38  
39  
40  
41  
42  
43  
44  
45  
46  
47  
48  
49  
50  
51  
52  
53  
54  
55  
56  
57  
58  
59  
60

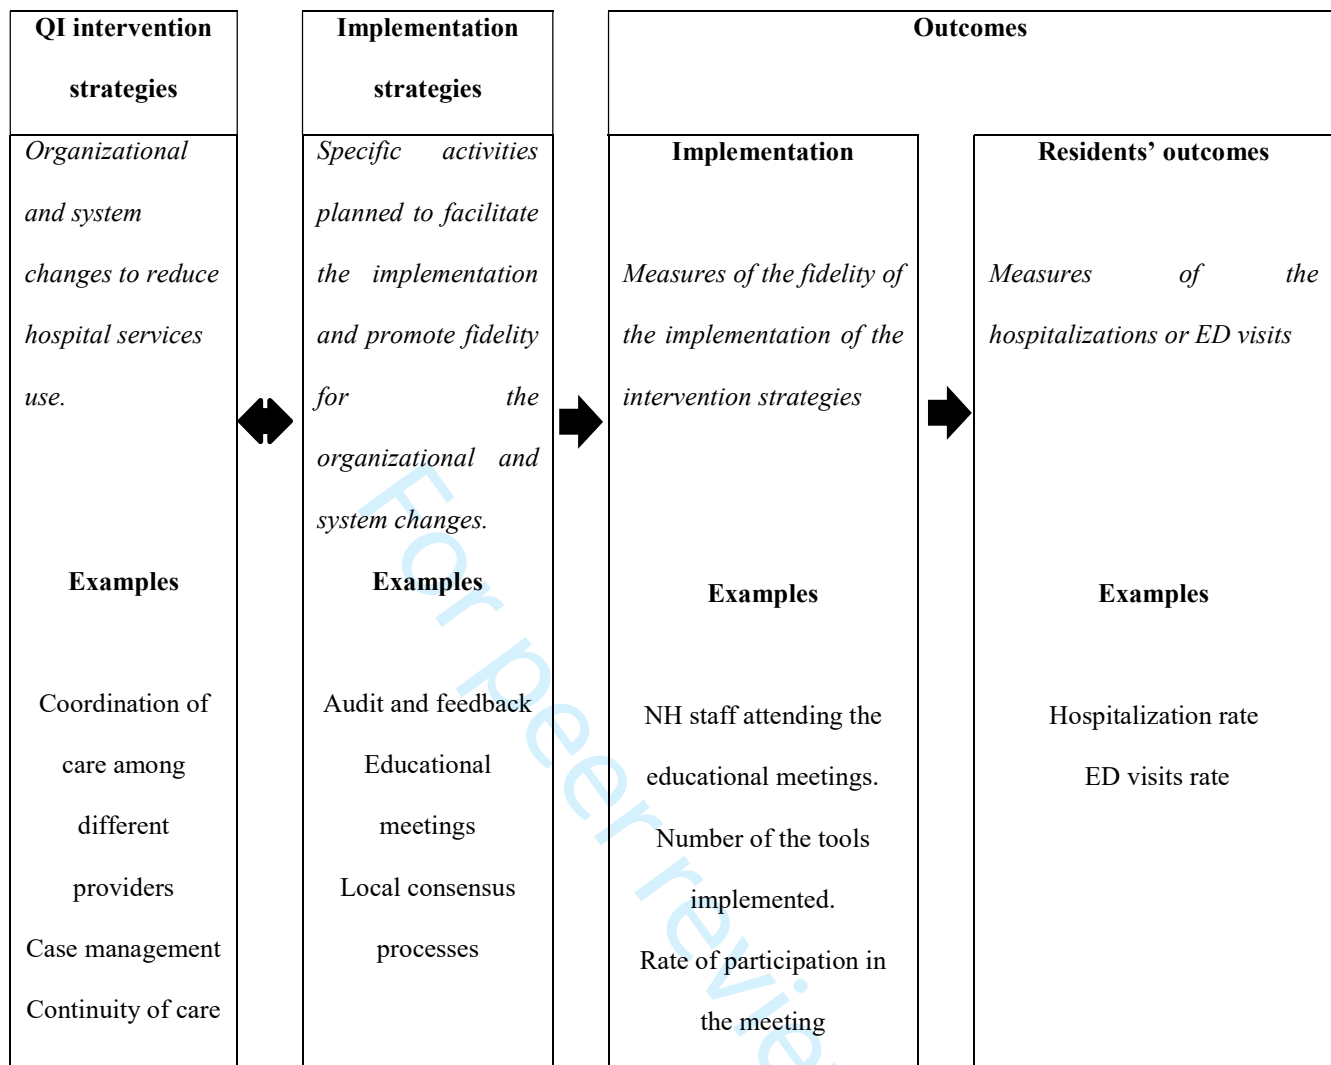

Figure 1: Adaptation of the implementation research conceptual model

| PubMed (Searched 31 <sup>th</sup> December 2022) |                                                                                                                                                                                                                                                                                                                                                                                                                                                                                                                                                                                                                                                                                                                                                                                                                                                                                                                                                                                                                                                                                                                                                                                                                                                                                                                                                                                                                                                                                                                                                                                                                                                                                                                                                                                                                                                                                                                                                                                                                                                                                                                                                                                                                                                                                                                                                                                                                                                                              |           |
|--------------------------------------------------|------------------------------------------------------------------------------------------------------------------------------------------------------------------------------------------------------------------------------------------------------------------------------------------------------------------------------------------------------------------------------------------------------------------------------------------------------------------------------------------------------------------------------------------------------------------------------------------------------------------------------------------------------------------------------------------------------------------------------------------------------------------------------------------------------------------------------------------------------------------------------------------------------------------------------------------------------------------------------------------------------------------------------------------------------------------------------------------------------------------------------------------------------------------------------------------------------------------------------------------------------------------------------------------------------------------------------------------------------------------------------------------------------------------------------------------------------------------------------------------------------------------------------------------------------------------------------------------------------------------------------------------------------------------------------------------------------------------------------------------------------------------------------------------------------------------------------------------------------------------------------------------------------------------------------------------------------------------------------------------------------------------------------------------------------------------------------------------------------------------------------------------------------------------------------------------------------------------------------------------------------------------------------------------------------------------------------------------------------------------------------------------------------------------------------------------------------------------------------|-----------|
| Search                                           | Query                                                                                                                                                                                                                                                                                                                                                                                                                                                                                                                                                                                                                                                                                                                                                                                                                                                                                                                                                                                                                                                                                                                                                                                                                                                                                                                                                                                                                                                                                                                                                                                                                                                                                                                                                                                                                                                                                                                                                                                                                                                                                                                                                                                                                                                                                                                                                                                                                                                                        | Items     |
| # 1                                              | ("Nursing Homes" [Mesh] OR "Nursing home*" [Title/Abstract] OR "Homes for the Aged" [Mesh] OR "Geriatric Home*" [Title/Abstract] OR "Old age home*" [Title/Abstract] OR "Home, old age" [Title/Abstract] OR "Homes, old age" [Title/Abstract] OR "Old people home*" [Title/Abstract] OR "Old people's home*" [Title/Abstract] OR "Long-Term Care" [Mesh] OR "Long-Term Care" [Title/Abstract] OR "Long Term Care" [Title/Abstract] OR "Long term facilit*" [Title/Abstract] OR "long-term facilit*" [Title/Abstract] OR "Skilled Nursing Facilities"[Mesh] OR "Skilled Nursing Facilit*" [Title/Abstract] OR "Care home*" [Title/Abstract] OR "Residential Facilities"[Mesh] OR "Residential facilit*" [Title/Abstract] OR "Residential home*" [Title/Abstract] OR "Residential institution*" [Title/abstract] OR "Institutional care*" [Title/Abstract] OR "Care facilit*" [Title/Abstract] OR "Continuing care*" [Title/Abstract] OR "Subacute Care"[Mesh] OR "Sub-acute care" [Title/Abstract] OR "Medical home*" [Title/Abstract] OR "Medical care" [Title/Abstract] OR "Extended care facilit*" [Title/Abstract] OR "Assisted Living Facilities"[Mesh] OR "Assisted living facility*" [Title/abstract] OR "Assisted living" [Title/Abstract] OR "Skilled care" [Title/Abstract] OR "Restorative care" [Title/Abstract] OR "Retirement center" [Title/Abstract] OR "Retirement centre" [Title/Abstract] OR "Retirement home" [Title/Abstract] OR "Senior residence facilit*" [Title/Abstract])                                                                                                                                                                                                                                                                                                                                                                                                                                                                                                                                                                                                                                                                                                                                                                                                                                                                                                                                                                           | 190,129   |
| #2                                               | ("Quality Improvement"[Mesh] OR "Quality improvement" [Title/Abstract] OR "Improvement Quality" [Title/Abstract] OR "Organizational Innovation"[Mesh] OR "Organizational innovation" [Title/Abstract] OR "Organisational innovation" [Title/Abstract] OR "Quality Assurance, Health Care"[Mesh] OR "Health Care Quality Assurance" [Title/Abstract] OR "Quality assurance, health care" [Title/Abstract] OR "Program Evaluation"[Mesh] OR "Program Evaluation*" [Title/Abstract] OR "Program effectiveness" [Title/Abstract] OR "Healthcare Quality Assurance" [Title/Abstract] OR "Management Quality Circles"[Mesh] OR "Management Quality Circles" [Title/abstract] OR "Total Quality Management"[Mesh] OR "Quality Management" [Title/Abstract] OR "Management, Total Quality" [Title/Abstract] OR "Total Quality Management" [Title/Abstract] OR "Clinical Governance"[Mesh] OR "Outcome Assessment, Health Care"[Majr] OR "Healthcare outcome assessment" [Title/Abstract] OR "Health Care outcome assessment" [Title/Abstract] OR "Process Assessment, Health Care"[Majr] OR "Process assessment, health care" [Title/Abstract] OR "Outcome measure" [Title/Abstract] OR "Outcome assessment" [Title/Abstract] OR "Health Care Process Assessment" [Title/Abstract] OR "Healthcare Process Assessment" [Title/Abstract] OR TQM [Title/Abstract] OR "Plan Do Study Act" [Title/Abstract] OR PDSA [Title/Abstract] OR "Plan Do Check Act" [Title/Abstract] OR PDCA [Title/Abstract] OR "Six Sigma" [Title/Abstract] OR Lean [Title/Abstract] OR DMAIC [Title/Abstract] OR DMADV [Title/Abstract] OR "Continuous Quality Improvement" [Title/Abstract] OR CQI [Title/Abstract] OR "Focus Analyse Develop Execute" [Title/Abstract] OR FADE [Title/Abstract] OR "Collaborative Quality Improvement*" [Title/Abstract] OR "Quality Improvement Collaborative*" [Title/Abstract] OR "Performance Improvement*" [Title/Abstract] or "Collaborative Improvement" [Title/Abstract] OR "Implementation Science"[Mesh] OR "Implement*" [Title/Abstract] OR ADOPT* [Title/Abstract] OR feedback [Title/Abstract] or "professional development" [Title/Abstract] or network* [Title/Abstract] or leadership [Title/Abstract] or opinion leader* [Title/Abstract] or "consensus process*" [Title/Abstract] or "change manage*" [Title/Abstract] or train* [Title/Abstract] or audit* [Title/Abstract] OR "root cause analysis" [Title/Abstract] OR "Diffusion of Innovation"[Mesh]) | 2,915,751 |
| #3                                               | ("Emergency Service, Hospital" [Mesh] OR "Hospital Emergency Service*" [Title/Abstract] OR "Emergency Hospital Service*" [Title/Abstract] OR "Emergency unit*" [Title/Abstract] OR "Unit Emergency" [Title/Abstract] OR "Units Emergency" [Title/Abstract] OR "Emergency Ward*" [Title/Abstract] OR "Ward Emergency" [Title/Abstract] OR "Wards Emergency" [Title/Abstract] OR "Emergency Department*" [Title/Abstract] OR "Room Emergency" [Title/Abstract] OR "Emergency Room*" [Title/Abstract] OR "Emergency Outpatient Unit*" [Title/Abstract] OR "Department Emergency" [Title/Abstract] OR "Departments Emergency" [Title/Abstract] OR "Outpatient Unit Emergency" [Title/Abstract] OR "Outpatient Units Emergency" [Title/Abstract] OR "Patient Admission"                                                                                                                                                                                                                                                                                                                                                                                                                                                                                                                                                                                                                                                                                                                                                                                                                                                                                                                                                                                                                                                                                                                                                                                                                                                                                                                                                                                                                                                                                                                                                                                                                                                                                                           | 1,032,253 |

|    |                                                                                                                                                                                                                                                                                                                                                                                                                                                                                                                                                                                                                                                         |       |
|----|---------------------------------------------------------------------------------------------------------------------------------------------------------------------------------------------------------------------------------------------------------------------------------------------------------------------------------------------------------------------------------------------------------------------------------------------------------------------------------------------------------------------------------------------------------------------------------------------------------------------------------------------------------|-------|
|    | [Mesh] OR Admission* [Title/Abstract] OR "Hospitalization"[Mesh] OR Hospitali* [Title/Abstract] OR "Hospital Transfer*" [Title/Abstract] OR "Hospital Admittance" [Title/Abstract] OR "Hospital Stay" [Title/Abstract] OR "Patient Readmission" [Mesh] OR Readmission* [Title/abstract] OR "Patient Transfer"[Mesh] OR "Emergency Treatment"[Mesh] OR "Acute care" [Title/Abstract] OR "Emergency care" [Title/Abstract] OR "Critical care" [Title/Abstract] OR "Acute service*" [Title/Abstract] OR "Emergency service*" [Title/Abstract] OR "Critical service*" [Title/Abstract] OR "Transitional Care"[Mesh] OR "Transitional care" [Title/Abstract] |       |
| #4 | #1 AND #2 AND #3 AND (2000:2022[pdat])                                                                                                                                                                                                                                                                                                                                                                                                                                                                                                                                                                                                                  | 8,058 |

| CINAHL Complete (Searched 31th December 2022) |                                                                                                                                                                                                                                                                                                                                                                                                                                                                                                                                                                                                                                                                                                                                                                                                                                                                                                                                                                                                                                                                                                                                                                                                                                                                                                                                                                                                                                                                                                                                                                                                                                                                                                                                                                                                                                                                                                                                                                                                                                                                                                                                                             |         |
|-----------------------------------------------|-------------------------------------------------------------------------------------------------------------------------------------------------------------------------------------------------------------------------------------------------------------------------------------------------------------------------------------------------------------------------------------------------------------------------------------------------------------------------------------------------------------------------------------------------------------------------------------------------------------------------------------------------------------------------------------------------------------------------------------------------------------------------------------------------------------------------------------------------------------------------------------------------------------------------------------------------------------------------------------------------------------------------------------------------------------------------------------------------------------------------------------------------------------------------------------------------------------------------------------------------------------------------------------------------------------------------------------------------------------------------------------------------------------------------------------------------------------------------------------------------------------------------------------------------------------------------------------------------------------------------------------------------------------------------------------------------------------------------------------------------------------------------------------------------------------------------------------------------------------------------------------------------------------------------------------------------------------------------------------------------------------------------------------------------------------------------------------------------------------------------------------------------------------|---------|
| Search                                        | Query                                                                                                                                                                                                                                                                                                                                                                                                                                                                                                                                                                                                                                                                                                                                                                                                                                                                                                                                                                                                                                                                                                                                                                                                                                                                                                                                                                                                                                                                                                                                                                                                                                                                                                                                                                                                                                                                                                                                                                                                                                                                                                                                                       | Items   |
| #1                                            | ((MH "Nursing Home Patients") OR (MH "Home Nursing") OR (MH "Nursing Homes") OR (MH "Residential Care") OR (MH "Housing for the Elderly") OR (MH "Long Term Care") OR (MH "Skilled Nursing Facilities") OR (MH "Residential Facilities") OR TI ("Nursing home*" OR "Geriatric home*" OR "Care home*" OR "care facilit*" OR "skilled nursing facilit*" OR "residential facilit*" OR "home* for aged" OR "long-term care*" OR "long term care*" OR "residential home*" OR "assisted living facilit*" OR "institutional care" OR "retirement home*" OR "retirement centre" OR "retirement center" OR "old people home" OR "old people homes" OR "continuing care" OR "Medical home*" OR "Medical care" OR "senior residence facility*") OR AB ("Nursing home*" OR "Geriatric home*" OR "Care home*" OR "care facilit*" OR "skilled nursing facilit*" OR "residential facilit*" OR "home* for aged" OR "long-term care*" OR "long term care*" OR "residential home*" OR "assisted living facilit*" OR "institutional care" OR "retirement home*" OR "retirement centre" OR "retirement center" OR "old people home" OR "old people homes" OR "continuing care" OR "Medical home*" OR "Medical care" OR "senior residence facility*"))                                                                                                                                                                                                                                                                                                                                                                                                                                                                                                                                                                                                                                                                                                                                                                                                                                                                                                                           | 128,129 |
| #2                                            | ((MH "Quality Improvement+") OR (MH "Evaluation and Quality Improvement Program") OR (MH "Quality Management, Organizational") OR (MH "Quality Assurance") OR (MH "Quality Circles") OR (MH "Clinical Governance") OR (MH "Program Evaluation") OR (MH "Outcome Assessment") OR (MH "Process Assessment (Health Care)") OR TI ("Quality improvement*" OR "Improvement quality" OR "Health care quality assurance" OR "Health-care quality assurance" OR "Quality assurance" OR "Organizational innovation" OR "Outcome assessment" OR "Process assessment" OR "program evaluation" OR "Program effectiveness" OR "Quality management" OR "Management, total quality" OR "Clinical Governance" OR "Outcome measure" OR "Health Care Process Assessment" OR "Healthcare Process Assessment" OR TQM OR "Plan Do Study Act" OR PDSA OR "Plan Do Check Act" OR PDCA OR "Six Sigma" OR Lean OR DMAIC OR DMADV "Continuous Quality Improvement" OR CQI OR "Focus Analyse Develop Execute" OR FADE OR "Collaborative Quality Improvement" OR "Quality Improvement Collaborative") OR AB ("Quality improvement*" OR "Improvement quality" OR "Health care quality assurance" OR "Health-care quality assurance" OR "Quality assurance" OR "Organizational innovation" OR "Outcome assessment" OR "Process assessment" OR "program evaluation" OR "Program effectiveness" OR "Quality management" OR "Management, total quality" OR "Clinical Governance" OR "Outcome measure" OR "Health Care Process Assessment" OR "Healthcare Process Assessment" OR TQM OR "Plan Do Study Act" OR PDSA OR "Plan Do Check Act" OR PDCA OR "Six Sigma" OR Lean OR DMAIC OR DMADV "Continuous Quality Improvement" OR CQI OR "Focus Analyse Develop Execute" OR FADE OR "Collaborative Quality Improvement" OR "Quality Improvement Collaborative" OR (MH "Implementation Science") OR "implementation science" OR (MH "Program Implementation") OR (MH "Systems Implementation") OR (MH "Root Cause Analysis") OR "implementation" OR (MH "Organizational Development") OR (MH "Audit") OR (MH "Change Management") OR (MH "Organizational Change") OR "Local consensus process")) | 393,141 |
| #3                                            | ((MH "Emergency Service") OR (MH "Hospitalization") OR (MH "Aged, Hospitalized") OR (MH "Hospitals") OR (MH "Patient Admission") OR (MH "Observation Units") OR                                                                                                                                                                                                                                                                                                                                                                                                                                                                                                                                                                                                                                                                                                                                                                                                                                                                                                                                                                                                                                                                                                                                                                                                                                                                                                                                                                                                                                                                                                                                                                                                                                                                                                                                                                                                                                                                                                                                                                                             | 432,718 |

|    |                                                                                                                                                                                                                                                                                                                                                                                                                                                                                                                                                                                                                                                                                                                                                                                                                                                                                                                                                                                                                                                                                                                                                                                                                                                                                                                                                                |             |
|----|----------------------------------------------------------------------------------------------------------------------------------------------------------------------------------------------------------------------------------------------------------------------------------------------------------------------------------------------------------------------------------------------------------------------------------------------------------------------------------------------------------------------------------------------------------------------------------------------------------------------------------------------------------------------------------------------------------------------------------------------------------------------------------------------------------------------------------------------------------------------------------------------------------------------------------------------------------------------------------------------------------------------------------------------------------------------------------------------------------------------------------------------------------------------------------------------------------------------------------------------------------------------------------------------------------------------------------------------------------------|-------------|
|    | (MH "Readmission") OR (MH "Transfer, Discharge") OR (MH "Emergency Treatment" OR (MH "Transitional Care") OR TI ("Hospital Emergency Service*" OR "Emergency Hospital Service*" OR "Emergency unit*" OR "Unit* Emergency" OR "Emergency Ward*" OR "Ward* Emergency" OR "Emergency Department*" OR "Room Emergency" OR "Emergency Room*" OR "Department* Emergency" OR "Patient Admission" OR "Admission*" OR "Hospitalization" OR Hospitali* OR "Hospital Transfer*" OR "Hospital Admittance" OR "Hospital Stay" OR "Patient Readmission" OR Readmission* OR "Patient Transfer" OR "Emergency Treatment" OR "Acute care" OR "Emergency care" OR "Critical care" OR "Acute service*" OR "Emergency service*" OR "Critical service*") OR AB ("Hospital Emergency Service*" OR "Emergency Hospital Service*" OR "Emergency unit*" OR "Unit* Emergency" OR "Emergency Ward*" OR "Ward* Emergency" OR "Emergency Department*" OR "Room Emergency" OR "Emergency Room*" OR "Department* Emergency" OR "Patient Admission" OR "Admission*" OR "Hospitalization" OR Hospitali* OR "Hospital Transfer*" OR "Hospital Admittance" OR "Hospital Stay" OR "Patient Readmission" OR Readmission* OR "Patient Transfer" OR "Emergency Treatment" OR "Acute care" OR "Emergency care" OR "Critical care" OR "Acute service*" OR "Emergency service*" OR "Critical service*")) |             |
| #4 | #1 AND #2 AND #3 AND (Published Date: 20000101-20221231)                                                                                                                                                                                                                                                                                                                                                                                                                                                                                                                                                                                                                                                                                                                                                                                                                                                                                                                                                                                                                                                                                                                                                                                                                                                                                                       | <b>3270</b> |

| <b>EMBASE (Searched 31<sup>th</sup> December 2022)</b> |                                                                                                                                                                                                                                                                                                                                                                                                                                                                                                                                                                                                                                                                                                                                                                                                                                                                                                                                                                                                                                                                                                                                                                                                                                                                                                                                                                                                                                                                                                                                                                                                                                                                                                                                                                                                                                        |              |
|--------------------------------------------------------|----------------------------------------------------------------------------------------------------------------------------------------------------------------------------------------------------------------------------------------------------------------------------------------------------------------------------------------------------------------------------------------------------------------------------------------------------------------------------------------------------------------------------------------------------------------------------------------------------------------------------------------------------------------------------------------------------------------------------------------------------------------------------------------------------------------------------------------------------------------------------------------------------------------------------------------------------------------------------------------------------------------------------------------------------------------------------------------------------------------------------------------------------------------------------------------------------------------------------------------------------------------------------------------------------------------------------------------------------------------------------------------------------------------------------------------------------------------------------------------------------------------------------------------------------------------------------------------------------------------------------------------------------------------------------------------------------------------------------------------------------------------------------------------------------------------------------------------|--------------|
| <b>Search</b>                                          | <b>Query</b>                                                                                                                                                                                                                                                                                                                                                                                                                                                                                                                                                                                                                                                                                                                                                                                                                                                                                                                                                                                                                                                                                                                                                                                                                                                                                                                                                                                                                                                                                                                                                                                                                                                                                                                                                                                                                           | <b>Items</b> |
| #1                                                     | 'nursing home'/exp OR 'extended care facility':ti,ab,kw OR 'intermediate care facilities':ti,ab,kw OR 'long term care facility':ti,ab,kw OR 'nursing home':ti,ab,kw OR 'nursing homes':ti,ab,kw OR 'skilled nursing facilities':ti,ab,kw OR 'skilled nursing facility':ti,ab,kw OR 'nursing home patient'/mj OR 'long term care patient':ti,ab,kw OR 'nursing home patient':ti,ab,kw OR 'nursing home resident':ti,ab,kw OR 'residential home'/mj OR 'institution, residential':ti,ab,kw OR 'residential facilities':ti,ab,kw OR 'residential home':ti,ab,kw OR 'residential institution':ti,ab,kw OR 'home for the aged'/mj OR 'continuing care retirement center':ti,ab,kw OR 'geriatric homes':ti,ab,kw OR 'home for the aged':ti,ab,kw OR 'home for the elderly':ti,ab,kw OR 'homes for the aged':ti,ab,kw OR 'housing for the elderly':ti,ab,kw OR 'old age home':ti,ab,kw OR 'old age homes':ti,ab,kw OR 'old people home':ti,ab,kw OR 'old people`s home':ti,ab,kw OR 'retirement center':ti,ab,kw OR 'retirement centre':ti,ab,kw OR 'retirement home':ti,ab,kw OR 'senior residence facility':ti,ab,kw OR 'long term care'/mj OR 'chronic treatment':ti,ab,kw OR 'long term care':ti,ab,kw OR 'long term medical care':ti,ab,kw OR 'long-term care':ti,ab,kw OR 'treatment, long term':ti,ab,kw OR 'assisted living facility'/mj OR 'assisted living':ti,ab,kw OR 'assisted living facilities':ti,ab,kw OR 'assisted living facility':ti,ab,kw OR 'institutional care'/mj OR 'care, institutional':ti,ab,kw OR 'institutional care':ti,ab,kw OR 'institutional practice':ti,ab,kw OR 'institutional therapy':ti,ab,kw OR 'institutional treatment':ti,ab,kw OR 'continuing care':ti,ab OR 'extended care':ti,ab,kw OR 'restorative care':ti,ab,kw OR 'skilled care':ti,ab,kw OR 'medical home'/mj OR 'institutional care'/mj) | 152,919      |
| #2                                                     | '(quality improvement':ti,ab,kw OR 'quality improvements':ti,ab,kw OR 'total quality management'/exp OR 'quality management':ti,ab,kw OR 'total quality management':ti,ab,kw OR 'management, total quality':ti,ab,kw OR 'quality improvement study'/exp OR 'organisational innovation':ti,ab,kw OR 'organizational innovation':ti,ab,kw OR 'quality control'/mj OR 'quality assessment':ti,ab,kw OR 'quality assurance':ti,ab,kw OR 'quality control':ti,ab,kw OR 'clinical governance':ti,ab,kw OR 'health care evaluation':ti,ab,kw OR 'health care quality assurance':ti,ab,kw OR 'healthcare evaluation':ti,ab,kw OR 'healthcare process assessment':ti,ab,kw OR 'healthcare quality assurance':ti,ab,kw OR 'quality assurance, health care':ti,ab,kw OR 'management quality circles':ti,ab,kw OR 'tqm:ti,ab OR 'plan do study act cycle'/exp OR 'pdsa:ti,ab OR 'plan do check act':ti,ab OR 'six sigma methodology'/exp OR 'six sigma':ti,ab,kw OR 'six sigma methodology':ti,ab,kw OR 'lean methodology'/exp OR 'lean initiative':ti,ab,kw OR 'lean management':ti,ab,kw OR 'lean methodology':ti,ab,kw OR 'lean philosophy':ti,ab,kw OR 'lean quality improvement':ti,ab,kw OR 'lean quality initiative':ti,ab,kw OR 'lean thinking':ti,ab,kw OR 'dmaic:ti,ab OR 'dmadv:ti,ab OR 'pdca:ti,ab OR 'continuous quality improvement'/exp OR 'cqi:ti,ab OR 'focus analyze develop execute':ti,ab OR 'ciq:ti,ab                                                                                                                                                                                                                                                                                                                                                                                                                       | 1,278,108    |

|    |                                                                                                                                                                                                                                                                                                                                                                                                                                                                                                                                                                                                                                                                                                                                                                                                                                                                                                                                                                                                                                                                                                                                                                                                                                                                                                               |           |
|----|---------------------------------------------------------------------------------------------------------------------------------------------------------------------------------------------------------------------------------------------------------------------------------------------------------------------------------------------------------------------------------------------------------------------------------------------------------------------------------------------------------------------------------------------------------------------------------------------------------------------------------------------------------------------------------------------------------------------------------------------------------------------------------------------------------------------------------------------------------------------------------------------------------------------------------------------------------------------------------------------------------------------------------------------------------------------------------------------------------------------------------------------------------------------------------------------------------------------------------------------------------------------------------------------------------------|-----------|
|    | OR 'collaborative quality improvement*':ti,ab OR 'performance improvement'/exp OR 'collaborative improvement':ti,ab OR 'outcome assessment'/mj OR 'health care outcome assessment':ti,ab,kw OR 'healthcare outcome assessment':ti,ab,kw OR 'outcome assessment':ti,ab,kw OR 'outcome assessment (health care)':ti,ab,kw OR 'outcome assessment, health care':ti,ab,kw OR 'outcome measurement':ti,ab,kw OR 'implementation science'/exp OR 'implementation'/mj OR 'adoption'/mj OR 'education'/mj OR 'education':ti,ab,kw OR 'self-evaluation programmes':ti,ab,kw OR 'self-evaluation programs':ti,ab,kw OR 'training support':ti,ab,kw OR 'local consensus process':ti,ab,kw OR 'professional development'/mj OR 'professional development':ti,ab,kw OR 'feedback system'/mj OR 'change management'/mj OR 'root cause analysis'/mj OR 'leadership'/mj OR 'leader':ti,ab,kw OR 'leadership':ti,ab,kw)                                                                                                                                                                                                                                                                                                                                                                                                        |           |
| #3 | ('hospital readmission'/exp OR 'hospital readmission':ti,ab,kw OR 'patient readmission':ti,ab,kw OR 'readmission':ti,ab,kw OR 'readmission rate':ti,ab,kw OR 'readmissions':ti,ab,kw OR 'rehospitalization':ti,ab,kw OR 'hospital admission'/exp OR 'admission, hospital':ti,ab,kw OR 'hospital admission':ti,ab,kw OR 'hospital admittance':ti,ab,kw OR 'hospital admitting department':ti,ab,kw OR 'hospital admitting service':ti,ab,kw OR 'hospital admitting unit':ti,ab,kw OR 'patient admission':ti,ab,kw OR 'hospitalization'/exp OR 'hospital stay':ti,ab,kw OR 'hospitalization':ti,ab,kw OR 'short stay hospitalization':ti,ab,kw OR 'emergency health service'/mj OR 'emergency health service'/exp/mj OR 'emergency medical service':ti,ab,kw OR 'emergency medical services':ti,ab,kw OR 'emergency service':ti,ab,kw OR 'patient transport'/mj OR 'patient transfer':ti,ab,kw OR 'patient transport':ti,ab,kw OR 'transport, patient':ti,ab,kw OR 'transportation of patients':ti,ab,kw OR 'Emergency Department*':ti,ab,kw OR 'Emergency Room*':ti,ab,kw OR 'Emergency ward*':ti,ab,kw OR 'emergency care'/mj OR 'acute care':ti,ab,kw OR 'acute medical care':ti,ab,kw OR 'emergency care':ti,ab,kw OR 'transitional care'/mj OR 'transition care':ti,ab,kw OR 'transitional care':ti,ab,kw) | 1,184,917 |
| #4 | #1 AND #2 AND #3 AND [2000-2022]/py                                                                                                                                                                                                                                                                                                                                                                                                                                                                                                                                                                                                                                                                                                                                                                                                                                                                                                                                                                                                                                                                                                                                                                                                                                                                           | 2,326     |

| <b>The Cochrane Library (Trials database) (Searched 31<sup>th</sup> December 2022)</b> |                                                                                                                                                                                                                                                                                                                                                                                                                                                                                                                                                                                                                                                                                                                                                                                                                                                                                                                                                                           |              |
|----------------------------------------------------------------------------------------|---------------------------------------------------------------------------------------------------------------------------------------------------------------------------------------------------------------------------------------------------------------------------------------------------------------------------------------------------------------------------------------------------------------------------------------------------------------------------------------------------------------------------------------------------------------------------------------------------------------------------------------------------------------------------------------------------------------------------------------------------------------------------------------------------------------------------------------------------------------------------------------------------------------------------------------------------------------------------|--------------|
| <b>Search</b>                                                                          | <b>Query</b>                                                                                                                                                                                                                                                                                                                                                                                                                                                                                                                                                                                                                                                                                                                                                                                                                                                                                                                                                              | <b>Items</b> |
| #1                                                                                     | ("Nursing home*" OR "Geriatric home*" OR "Care home*" OR "care facilit*" OR "skilled nursing facilit*" OR "residential facilit*" OR "homes for aged" OR "long-term care*" OR "long term care*" OR "residential home*" OR "assisted living facilit*" OR "institutional care" OR "retirement home*" OR "retirement centre" OR "retirement center" OR "old people home" OR "old people homes" OR "continuing care" OR "Medical home" OR "Medical homes" OR "Medical care" OR "senior residence facilit*") in Title Abstract Keyword                                                                                                                                                                                                                                                                                                                                                                                                                                          | 25,298       |
| #2                                                                                     | ("Quality improvement*" OR "Improvement quality" OR "Health care quality assurance" OR "Health-care quality assurance" OR "Quality assurance" OR "Organizational innovation" OR "Outcome assessment" OR "Process assessment" OR "program evaluation" OR "Program effectiveness" OR "Quality management" OR "Management, total quality" OR "Clinical Governance" OR "Outcome measure" OR "Health Care Process Assessment" OR "Healthcare Process Assessment" OR TQM OR "Plan Do Study Act" OR PDSA OR "Plan Do Check Act" OR PDCA OR "Six Sigma" OR Lean OR DMAIC OR DMADV OR "Continuous Quality Improvement" OR CQI OR "Focus Analyse Develop Execute" OR FADE OR "Collaborative Quality Improvement" OR "Quality Improvement Collaborative" OR Implement* OR Adopt* OR "Change management" OR "Workforce development" OR "professional development" OR feedback OR audit OR "Root cause analysis" OR "Local consensus process" OR leadership) in Title Abstract Keyword | 251,531      |
| #3                                                                                     | ("Hospital Emergency Service*" OR "Emergency Hospital Service*" OR "Emergency unit*" OR "Unit Emergency" OR "Emergency Ward*" OR "Ward Emergency" OR "Emergency Department*" OR "Room Emergency" OR "Emergency Room*" OR "Department Emergency" OR "Patient Admission" OR Admission* OR "Hospitalization" OR Hospital* OR "Hospital Transfer*" OR                                                                                                                                                                                                                                                                                                                                                                                                                                                                                                                                                                                                                         | 235,675      |

|    |                                                                                                                                                                                                                                                                                       |       |
|----|---------------------------------------------------------------------------------------------------------------------------------------------------------------------------------------------------------------------------------------------------------------------------------------|-------|
|    | "Hospital Admittance" OR "Hospital Stay" OR "Patient Readmission" OR Readmission* OR "Patient Transfer" OR "Emergency Treatment" OR "Acute care" OR "Emergency care" OR "Critical care" OR "Acute service*" OR "Emergency service*" OR "Critical service*") in Title Abstract Keyword |       |
| #4 | #1 AND #2 AND #3 AND                                                                                                                                                                                                                                                                  | 2,790 |

| Web of science (Searched 31th December 2022) |                                                                                                                                                                                                                                                                                                                                                                                                                                                                                                                                                                                                                                                                                                                                                                                                                                                                                                                                                                                                                                                                                                                                                                                                                                                                                                                                                                                                                                                                                                                                                                                              |           |
|----------------------------------------------|----------------------------------------------------------------------------------------------------------------------------------------------------------------------------------------------------------------------------------------------------------------------------------------------------------------------------------------------------------------------------------------------------------------------------------------------------------------------------------------------------------------------------------------------------------------------------------------------------------------------------------------------------------------------------------------------------------------------------------------------------------------------------------------------------------------------------------------------------------------------------------------------------------------------------------------------------------------------------------------------------------------------------------------------------------------------------------------------------------------------------------------------------------------------------------------------------------------------------------------------------------------------------------------------------------------------------------------------------------------------------------------------------------------------------------------------------------------------------------------------------------------------------------------------------------------------------------------------|-----------|
| Search                                       | Query                                                                                                                                                                                                                                                                                                                                                                                                                                                                                                                                                                                                                                                                                                                                                                                                                                                                                                                                                                                                                                                                                                                                                                                                                                                                                                                                                                                                                                                                                                                                                                                        | Items     |
| #1                                           | TI=("Nursing home*" OR "Geriatric home*" OR "Care home*" OR "care facilit*" OR "skilled nursing facilit*" OR "residential facilit*" OR "home* for aged" OR "long-term care*" OR "long term care*" OR "residential home*" OR "assisted living facilit*" OR "institutional care" OR "retirement home*" OR "retirement centre" OR "retirement center" OR "old people home" OR "old people homes" OR "continuing care" OR "Medical home*" OR "Medical care" OR "senior residence facility*") OR AB=("Nursing home*" OR "Geriatric home*" OR "Care home*" OR "care facilit*" OR "skilled nursing facilit*" OR "residential facilit*" OR "home* for aged" OR "long-term care*" OR "long term care*" OR "residential home*" OR "assisted living facilit*" OR "institutional care" OR "retirement home*" OR "retirement centre" OR "retirement center" OR "old people home" OR "old people homes" OR "continuing care" OR "Medical home*" OR "Medical care" OR "senior residence facility*")                                                                                                                                                                                                                                                                                                                                                                                                                                                                                                                                                                                                         | 126,846   |
| #2                                           | TI=("Quality improvement*" OR "Improvement quality" OR "Health care quality assurance" OR "Health-care quality assurance" OR "Quality assurance" OR "Organizational innovation" OR "Outcome assessment" OR "Process assessment" OR "program evaluation" OR "Program effectiveness" OR "Quality management" OR "Management, total quality" OR "Clinical Governance" OR "Outcome measure" OR "Health Care Process Assessment" OR "Healthcare Process Assessment" OR TQM OR "Plan Do Study Act" OR PDSA OR "Plan Do Check Act" OR PDCA OR "Six Sigma" OR Lean OR DMAIC OR DMADV OR "Continuous Quality Improvement" OR CQI OR "Focus Analyse Develop Execute" OR FADE OR "Collaborative Quality Improvement" OR "Quality Improvement Collaborative" OR "Implementation" OR "Change management") OR AB=("Quality improvement*" OR "Improvement quality" OR "Health care quality assurance" OR "Health-care quality assurance" OR "Quality assurance" OR "Organizational innovation" OR "Outcome assessment" OR "Process assessment" OR "program evaluation" OR "Program effectiveness" OR "Quality management" OR "Management, total quality" OR "Clinical Governance" OR "Outcome measure" OR "Health Care Process Assessment" OR "Healthcare Process Assessment" OR TQM OR "Plan Do Study Act" OR PDSA OR "Plan Do Check Act" OR PDCA OR "Six Sigma" OR Lean OR DMAIC OR DMADV OR "Continuous Quality Improvement" OR CQI OR "Focus Analyse Develop Execute" OR FADE OR "Collaborative Quality Improvement" OR "Quality Improvement Collaborative" OR "Implementation" OR "Change management") | 1,394,815 |
| #3                                           | TI=("Hospital Emergency Service*" OR "Emergency Hospital Service*" OR "Emergency unit*" OR "Unit* Emergency" OR "Emergency Ward*" OR "Ward* Emergency" OR "Emergency Department*" OR "Room Emergency" OR "Emergency Room*" OR "Department* Emergency" OR "Patient Admission" OR Admission* OR "Hospitalization" OR Hospitali* OR "Hospital Transfer*" OR "Hospital Admittance" OR "Hospital Stay" OR "Patient Readmission" OR Readmission* OR "Patient Transfer" OR "Emergency Treatment" OR "Acute care" OR "Emergency care" OR "Critical care" OR "Acute service*" OR "Emergency service*" OR "Critical service*") OR AB=("Hospital Emergency Service*" OR "Emergency Hospital Service*" OR "Emergency unit*" OR "Unit* Emergency" OR "Emergency Ward*" OR "Ward* Emergency" OR "Emergency Department*" OR "Room Emergency" OR "Emergency Room*" OR "Department* Emergency" OR "Patient Admission" OR Admission* OR "Hospitalization" OR Hospitali* OR "Hospital Transfer*" OR "Hospital Admittance" OR "Hospital Stay" OR "Patient Readmission" OR Readmission* OR "Patient Transfer" OR "Emergency Treatment" OR "Acute care" OR "Emergency care" OR "Critical care" OR "Acute service*" OR "Emergency service*" OR "Critical service*")                                                                                                                                                                                                                                                                                                                                                 | 729,489   |
| #4                                           | #1 AND #2 AND #3 AND Timespan: 2000-01-01 to 2022-12-31 (Index Date)                                                                                                                                                                                                                                                                                                                                                                                                                                                                                                                                                                                                                                                                                                                                                                                                                                                                                                                                                                                                                                                                                                                                                                                                                                                                                                                                                                                                                                                                                                                         | 2007      |



1  
2  
3  
4  
5  
6  
7  
8  
9  
10  
11  
12  
13  
14  
15  
16  
17  
18  
19  
20  
21  
22  
23  
24  
25  
26  
27  
28  
29  
30  
31  
32  
33  
34  
35  
36  
37  
38  
39  
40  
41  
42  
43  
44  
45  
46  
47  
48  
49  
50  
51  
52  
53  
54  
55  
56  
57  
58  
59  
60

For peer review only

# Reporting checklist for protocol of a systematic review and meta analysis.

Based on the PRISMA-P guidelines.

## Instructions to authors

Complete this checklist by entering the page numbers from your manuscript where readers will find each of the items listed below.

Your article may not currently address all the items on the checklist. Please modify your text to include the missing information. If you are certain that an item does not apply, please write "n/a" and provide a short explanation.

Upload your completed checklist as an extra file when you submit to a journal.

In your methods section, say that you used the PRISMA-Preporting guidelines, and cite them as:

Moher D, Shamseer L, Clarke M, Ghersi D, Liberati A, Petticrew M, Shekelle P, Stewart LA. Preferred Reporting Items for Systematic Review and Meta-Analysis Protocols (PRISMA-P) 2015 statement. Syst Rev. 2015;4(1):1.

|                     |                     | Reporting Item                                                                                                                            | Page Number |
|---------------------|---------------------|-------------------------------------------------------------------------------------------------------------------------------------------|-------------|
| <b>Title</b>        |                     |                                                                                                                                           |             |
| Identification      | <a href="#">#1a</a> | Identify the report as a protocol of a systematic review                                                                                  | 1; 5        |
| Update              | <a href="#">#1b</a> | If the protocol is for an update of a previous systematic review, identify as such                                                        | na          |
| <b>Registration</b> |                     |                                                                                                                                           |             |
|                     | <a href="#">#2</a>  | If registered, provide the name of the registry (such as PROSPERO) and registration number                                                | 5           |
| <b>Authors</b>      |                     |                                                                                                                                           |             |
| Contact             | <a href="#">#3a</a> | Provide name, institutional affiliation, e-mail address of all protocol authors; provide physical mailing address of corresponding author | 1           |
| Contribution        | <a href="#">#3b</a> | Describe contributions of protocol authors and identify the                                                                               | 16          |

guarantor of the review

## Amendments

|                    |                                                                                                                                                                                                 |    |
|--------------------|-------------------------------------------------------------------------------------------------------------------------------------------------------------------------------------------------|----|
| <a href="#">#4</a> | If the protocol represents an amendment of a previously completed or published protocol, identify as such and list changes; otherwise, state plan for documenting important protocol amendments | na |
|--------------------|-------------------------------------------------------------------------------------------------------------------------------------------------------------------------------------------------|----|

## Support

|                           |                     |                                                                                                      |    |
|---------------------------|---------------------|------------------------------------------------------------------------------------------------------|----|
| Sources                   | <a href="#">#5a</a> | Indicate sources of financial or other support for the review                                        | 16 |
| Sponsor                   | <a href="#">#5b</a> | Provide name for the review funder and / or sponsor                                                  | 16 |
| Role of sponsor or funder | <a href="#">#5c</a> | Describe roles of funder(s), sponsor(s), and / or institution(s), if any, in developing the protocol | 16 |

## Introduction

|            |                    |                                                                                                                                                          |     |
|------------|--------------------|----------------------------------------------------------------------------------------------------------------------------------------------------------|-----|
| Rationale  | <a href="#">#6</a> | Describe the rationale for the review in the context of what is already known                                                                            | 3-5 |
| Objectives | <a href="#">#7</a> | Provide an explicit statement of the question(s) the review will address with reference to participants, interventions, comparators, and outcomes (PICO) | 5   |

## Methods

|                                 |                      |                                                                                                                                                                                                                               |       |
|---------------------------------|----------------------|-------------------------------------------------------------------------------------------------------------------------------------------------------------------------------------------------------------------------------|-------|
| Eligibility criteria            | <a href="#">#8</a>   | Specify the study characteristics (such as PICO, study design, setting, time frame) and report characteristics (such as years considered, language, publication status) to be used as criteria for eligibility for the review | 7-8-9 |
| Information sources             | <a href="#">#9</a>   | Describe all intended information sources (such as electronic databases, contact with study authors, trial registers or other grey literature sources) with planned dates of coverage                                         | 6-7   |
| Search strategy                 | <a href="#">#10</a>  | Present draft of search strategy to be used for at least one electronic database, including planned limits, such that it could be repeated                                                                                    | 6-7   |
| Study records - data management | <a href="#">#11a</a> | Describe the mechanism(s) that will be used to manage records and data throughout the review                                                                                                                                  | 9     |
| Study records -                 | <a href="#">#11b</a> | State the process that will be used for selecting studies (such                                                                                                                                                               | 6-7   |

|    |                    |                                                                                      |     |
|----|--------------------|--------------------------------------------------------------------------------------|-----|
| 1  |                    |                                                                                      |     |
| 2  |                    |                                                                                      |     |
| 3  | selection process  | as two independent reviewers) through each phase of the                              |     |
| 4  |                    | review (that is, screening, eligibility and inclusion in meta-                       |     |
| 5  |                    | analysis)                                                                            |     |
| 6  |                    |                                                                                      |     |
| 7  |                    |                                                                                      |     |
| 8  | Study records -    | <a href="#">#11c</a> Describe planned method of extracting data from reports         | 6-7 |
| 9  | data collection    | (such as piloting forms, done independently, in duplicate),                          |     |
| 10 | process            | any processes for obtaining and confirming data from                                 |     |
| 11 |                    | investigators                                                                        |     |
| 12 |                    |                                                                                      |     |
| 13 |                    |                                                                                      |     |
| 14 | Data items         | <a href="#">#12</a> List and define all variables for which data will be sought      | 7-8 |
| 15 |                    | (such as PICO items, funding sources), any pre-planned data                          |     |
| 16 |                    | assumptions and simplifications                                                      |     |
| 17 |                    |                                                                                      |     |
| 18 |                    |                                                                                      |     |
| 19 |                    |                                                                                      |     |
| 20 | Outcomes and       | <a href="#">#13</a> List and define all outcomes for which data will be sought,      | 8   |
| 21 | prioritization     | including prioritization of main and additional outcomes, with                       |     |
| 22 |                    | rationale                                                                            |     |
| 23 |                    |                                                                                      |     |
| 24 |                    |                                                                                      |     |
| 25 | Risk of bias in    | <a href="#">#14</a> Describe anticipated methods for assessing risk of bias of       | 9   |
| 26 | individual studies | individual studies, including whether this will be done at the                       |     |
| 27 |                    | outcome or study level, or both; state how this information will                     |     |
| 28 |                    | be used in data synthesis                                                            |     |
| 29 |                    |                                                                                      |     |
| 30 |                    |                                                                                      |     |
| 31 |                    |                                                                                      |     |
| 32 | Data synthesis     | <a href="#">#15a</a> Describe criteria under which study data will be quantitatively | 10  |
| 33 |                    | synthesised                                                                          |     |
| 34 |                    |                                                                                      |     |
| 35 | Data synthesis     | <a href="#">#15b</a> If data are appropriate for quantitative synthesis, describe    | 10  |
| 36 |                    | planned summary measures, methods of handling data and                               |     |
| 37 |                    | methods of combining data from studies, including any                                |     |
| 38 |                    | planned exploration of consistency (such as I <sup>2</sup> , Kendall's $\tau$ )      |     |
| 39 |                    |                                                                                      |     |
| 40 |                    |                                                                                      |     |
| 41 |                    |                                                                                      |     |
| 42 | Data synthesis     | <a href="#">#15c</a> Describe any proposed additional analyses (such as              | 10  |
| 43 |                    | sensitivity or subgroup analyses, meta-regression)                                   |     |
| 44 |                    |                                                                                      |     |
| 45 |                    |                                                                                      |     |
| 46 | Data synthesis     | <a href="#">#15d</a> If quantitative synthesis is not appropriate, describe the type | 10  |
| 47 |                    | of summary planned                                                                   |     |
| 48 |                    |                                                                                      |     |
| 49 |                    |                                                                                      |     |
| 50 | Meta-bias(es)      | <a href="#">#16</a> Specify any planned assessment of meta-bias(es) (such as         | 10  |
| 51 |                    | publication bias across studies, selective reporting within                          |     |
| 52 |                    | studies)                                                                             |     |
| 53 |                    |                                                                                      |     |
| 54 |                    |                                                                                      |     |
| 55 | Confidence in      | <a href="#">#17</a> Describe how the strength of the body of evidence will be        | na  |
| 56 | cumulative         | assessed (such as GRADE)                                                             |     |
| 57 | evidence           |                                                                                      |     |
| 58 |                    |                                                                                      |     |
| 59 |                    |                                                                                      |     |
| 60 |                    |                                                                                      |     |

1  
2  
3  
4  
5  
6  
7  
8  
9  
10  
11  
12  
13  
14  
15  
16  
17  
18  
19  
20  
21  
22  
23  
24  
25  
26  
27  
28  
29  
30  
31  
32  
33  
34  
35  
36  
37  
38  
39  
40  
41  
42  
43  
44  
45  
46  
47  
48  
49  
50  
51  
52  
53  
54  
55  
56  
57  
58  
59  
60

The PRISMA-P elaboration and explanation paper is distributed under the terms of the Creative Commons Attribution License CC-BY. This checklist was completed on 08. April 2023 using <https://www.goodreports.org/>, a tool made by the [EQUATOR Network](#) in collaboration with [Penelope.ai](#)

For peer review only

# BMJ Open

## Quality improvement interventions to prevent the use of hospital services among nursing home residents: protocol for a systematic review and meta-analysis

|                                 |                                                                                                                                                                                                                                                                                                                                                                                                                                                                                                                                                                                                                                                                                              |
|---------------------------------|----------------------------------------------------------------------------------------------------------------------------------------------------------------------------------------------------------------------------------------------------------------------------------------------------------------------------------------------------------------------------------------------------------------------------------------------------------------------------------------------------------------------------------------------------------------------------------------------------------------------------------------------------------------------------------------------|
| Journal:                        | <i>BMJ Open</i>                                                                                                                                                                                                                                                                                                                                                                                                                                                                                                                                                                                                                                                                              |
| Manuscript ID                   | bmjopen-2023-074684.R1                                                                                                                                                                                                                                                                                                                                                                                                                                                                                                                                                                                                                                                                       |
| Article Type:                   | Protocol                                                                                                                                                                                                                                                                                                                                                                                                                                                                                                                                                                                                                                                                                     |
| Date Submitted by the Author:   | 04-Aug-2023                                                                                                                                                                                                                                                                                                                                                                                                                                                                                                                                                                                                                                                                                  |
| Complete List of Authors:       | Basso, Ines; Università degli Studi del Piemonte Orientale Amedeo Avogadro, Department of Medicina Traslazionale<br>Gonella, Silvia; Azienda Ospedaliero Universitaria Citta della Salute e della Scienza di Torino<br>Bassi, Erika; Università degli Studi del Piemonte Orientale Amedeo Avogadro, Department of Medicina Traslazionale<br>Caristia, Silvia; Università degli Studi del Piemonte Orientale Amedeo Avogadro, Department of Medicina Traslazionale<br>Campagna, Sara; Università degli Studi di Torino, Department of Public Health and Pediatrics<br>Dal Molin, Alberto; Università degli Studi del Piemonte Orientale Amedeo Avogadro, Department of Medicina Traslazionale |
| <b>Primary Subject Heading</b>: | Geriatric medicine                                                                                                                                                                                                                                                                                                                                                                                                                                                                                                                                                                                                                                                                           |
| Secondary Subject Heading:      | Evidence based practice, Health services research, Palliative care                                                                                                                                                                                                                                                                                                                                                                                                                                                                                                                                                                                                                           |
| Keywords:                       | Aging, Hospitalization, Change management < HEALTH SERVICES ADMINISTRATION & MANAGEMENT, Nursing Care, Systematic Review                                                                                                                                                                                                                                                                                                                                                                                                                                                                                                                                                                     |
|                                 |                                                                                                                                                                                                                                                                                                                                                                                                                                                                                                                                                                                                                                                                                              |

SCHOLARONE™  
Manuscripts

1  
2  
3  
4  
5  
6  
7  
8  
9  
10  
11  
12  
13  
14  
15  
16  
17  
18  
19  
20  
21  
22  
23  
24  
25  
26  
27  
28  
29  
30  
31  
32  
33  
34  
35  
36  
37  
38  
39  
40  
41  
42  
43  
44  
45  
46  
47  
48  
49  
50  
51  
52  
53  
54  
55  
56  
57  
58  
59  
60

1 **Title:** Quality improvement interventions to prevent the use of hospital services among nursing  
2 home residents: protocol for a systematic review and meta-analysis

3  
4  
5  
6  
7  
8  
9  
10 **Authors:**

11  
12 5 Ines Basso<sup>1,2\*</sup>, [ines.basso@uniupo.it](mailto:ines.basso@uniupo.it)

13  
14 6 Silvia Gonella<sup>3</sup>, [silvia.gonella@unito.it](mailto:silvia.gonella@unito.it)

15  
16 7 Erika Bassi<sup>1</sup>, [erika.bassi@uniupo.it](mailto:erika.bassi@uniupo.it)

17  
18 8 Silvia Caristia<sup>1</sup>, [silvia.caristia@med.uniupo.it](mailto:silvia.caristia@med.uniupo.it)

19  
20 9 Sara Campagna<sup>4#</sup>, [sara.campagna@unito.it](mailto:sara.campagna@unito.it)

21  
22  
23  
24  
25 10 and

26  
27  
28 11 Alberto Dal Molin<sup>1#</sup>, [alberto.dalmolin@med.uniupo.it](mailto:alberto.dalmolin@med.uniupo.it) (<https://orcid.org/0000-0003-2263-1340>)

29  
30  
31  
32  
33 **Affiliations:**

34  
35  
36 14 <sup>1</sup> Università degli Studi del Piemonte Orientale Amedeo Avogadro, Department of Medicina  
37 Traslazionale, Novara, Piemonte, IT

38 15  
39 16 <sup>2</sup> Azienda Ospedaliera Nazionale SS Antonio e Biagio e C Arrigo, Department of Research,  
40 Training and Innovation Alessandria, Piemonte, IT

41 17  
42 18 <sup>3</sup> Azienda Ospedaliero Universitaria Città della Salute e della Scienza di Torino  
43 Torino, Piemonte, IT

44 19  
45 20 <sup>4</sup> Università degli Studi di Torino, Department of Public Health and Pediatrics  
46 Torino, Piemonte, IT

47  
48  
49  
50  
51  
52 23 **\*Corresponding author: Ines Basso, [ines.basso@uniupo.it](mailto:ines.basso@uniupo.it)**

53  
54 24 <https://orcid.org/0000-0002-9283-236X>

55  
56  
57  
58  
59 26 #Sara Campagna and Alberto Dal Molin are co-last authors- They contributed equally to this work.

## Abstract

**Introduction:** Quality improvement interventions are a promising strategy for reducing hospital services use among nursing home residents. However, evidence for their effectiveness is limited. It is unclear which characteristics of the quality improvement intervention and activities planned to facilitate implementation may promote fidelity to organizational and system changes. This systematic review and meta-analysis will assess the effectiveness of quality improvement interventions and implementation strategies aimed at reducing hospital services use among nursing home residents.

**Methods and analysis:** The Medline, CINAHL, Cochrane Library, Embase and Web of Science databases will be comprehensively searched in September 2023. The eligible studies should focus on the implementation of a quality improvement intervention defined as the systematic, continuous approach that designs, tests, and implements changes using real-time measurement to reduce hospitalizations or emergency department visits among long-stay nursing home residents. Quality improvement details and implementation strategies will be deductively categorized into effective practice and organisation of care taxonomy domains for delivery arrangements and implementation strategies. Quality and bias assessments will be completed using the Quality Improvement Minimum Quality Criteria Set and the Joanna Briggs Institute Critical Appraisal Tools.

The results will be pooled in a meta-analysis, by combining the natural logarithms of the rate ratios across the studies or by calculating the rate ratio using the generic inverse-variance method. Heterogeneity will be assessed using the  $I^2$  or  $H^2$  statistics if the number of included studies will be less than 10. Raw data will be requested from the authors, as required.

**Ethics and dissemination:** Ethical approval is not required. The results will be published in a peer-review journal and presented at (inter)national conferences.

**Prospero registration number:** CRD42022364195



1  
2  
3 52 **Keywords:** Systematic review, nursing homes, quality improvement, implementation science,  
4  
5 53 hospital admissions, emergency department visits  
6  
7  
8 54

9  
10 55 **Strengths and limitations of this study**  
11

- 12 56 • The protocol complies with the Preferred Reporting Items for Systematic Reviews and  
13  
14 Meta-analyses Protocol guideline.  
15 57  
16  
17 58 • A comprehensive search strategy has been developed to include all eligible studies meeting  
18  
19 59 the inclusion criteria.  
20  
21  
22 60 • The study screening, selection, data extraction and assessment of the risk of bias will be  
23  
24 61 completed by two independent reviewers.  
25  
26 62 • The study will assess both the risk of bias and quality of quality improvement interventions.  
27  
28  
29 63

30  
31  
32 64 **Introduction**  
33

34  
35 65 By 2050, the global population aged 80 years or over is estimated to triple (1) and the demand for  
36  
37 66 Nursing Home (NH) services is expected to increase. NH residents have complex health needs and  
38  
39 67 challenging medical situations (2,3) that lead to frequent hospital service use (4–6). These are costly  
40  
41 68 and entail the risk of iatrogenic harms, including delirium, infections, and loss of functional  
42  
43 69 dependency (7). Although a significant proportion of accesses to hospital services are helpful and  
44  
45 70 necessary, international research suggests that up to 55% of hospitalizations in NHs can be avoided  
46  
47 71 with appropriate care (8). In fact, many conditions that result in admission or emergency department  
48  
49 72 visit could be averted through proper prevention (e.g., exacerbation of chronic diseases or  
50  
51 73 functional decline) or effective on-site management at an early stage (e.g., infection or dehydration)  
52  
53 74 (9,10). Improving the NH staff's skills in early recognition and management of acute change of  
54  
55 75 conditions, and the use of standardized communication tools could prevent avoidable access to  
56  
57 76 hospital services (11). Similarly, promoting palliative care and advanced care planning enables

1  
2  
3 77 healthcare professionals to be aligned with residents' preferences and values, ensuring the provision  
4  
5 78 of respectful and patient-centred care (12).  
6  
7

8  
9 79 Quality improvement (QI) interventions may be a promising strategy for improving care for NH  
10  
11 80 residents and preventing hospital service use (13–15). QI intervention is defined as a systematic and  
12  
13 81 continuous approach that designs, tests and implements changes using real-time measurements to  
14  
15 82 improve the safety, effectiveness, and experience of care (16).  
16  
17

18  
19 83 Quality improvements are usually designed as multi-component interventions to tackle an  
20  
21 84 improvement problem, involving all the organization providers, including front-line staff, and using  
22  
23 85 recognized methods to identify all potential causes of the problem and assess the impact of the  
24  
25 86 intervention against the expected results through reliable process and outcome measures (17).  
26  
27

28 87 Quality improvement interventions rely on several implementation strategies to improve adaptation  
29  
30 88 and stakeholder engagement, which may vary widely across projects and include audits, feedback,  
31  
32 89 staff education, tools, and site champions (13,18). However, the effects of different implementation  
33  
34 90 strategies on the success of QI interventions remain unclear.  
35  
36

37  
38 91 To better describe the heterogeneity of the healthcare interventions, including QI research, the  
39  
40 92 Cochrane Effective Practice and Organization of Care (EPOC) group developed a taxonomy for  
41  
42 93 quality interventions based on pragmatic descriptions of components rather than theoretical  
43  
44 94 constructs (19). The EPOC taxonomy, which can be used as a framework for exploring  
45  
46 95 interventions, includes four domains of intervention delivery arrangements, financial arrangements,  
47  
48 96 governance arrangements, and implementation strategies each of which is divided into categories  
49  
50 97 and subcategories (20).  
51  
52  
53

54  
55 98 Previous experiences in hospital acute care setting found QI interventions beneficial in enhancing  
56  
57 99 process care outcomes, such as organizational culture or teamwork, and improving patient care, by  
58  
59 100 reducing the nosocomial infection rate, preventing falls, or improving surgical outcomes (21-24).  
60

1  
2  
3 101 Although previous studies have obtained encouraging results related to QI interventions, evidence  
4  
5 102 of its effectiveness in NH remain limited (25,26) In particular, the INTERACT II intervention  
6  
7  
8 103 significantly reduced hospital admissions through a multi-component QI intervention aimed at  
9  
10 104 training NH staff to identify and proactively manage major geriatric syndromes, encouraging  
11  
12 105 advanced care planning, and promoting palliative care-oriented care. (27)

14  
15 106 Given the high rate of hospital service use among NH residents, it is important to understand  
16  
17  
18 107 whether QI interventions can prevent avoidable transfers. Compared to the hospital setting, the  
19  
20 108 long-term care context poses several challenges that could impede the smooth implementation of a  
21  
22 109 QI initiative (25,28,29). The long-term care context has multiple unique barriers at the  
23  
24  
25 110 organizational level: inner/internal barriers (e.g., organizational culture, leadership or learning  
26  
27 111 climate), outer/external barriers (e.g., organizational funding, law, and regulation), and barriers at  
28  
29 112 the staff level (e.g., knowledge, skills, and motivation) (30).

31  
32 113 The NH environment can be particularly challenging because of workforce shortages and high  
33  
34  
35 114 turnover rates (31,32). Introducing a practice change that requires staff engagement in an under  
36  
37 115 resourced organization may result in poor adherence to the intervention or an unsuccessful program  
38  
39 116 because of lack of time (33). Additionally, a high staff turnover may lead to a continuous need to  
40  
41  
42 117 support training and education in evidence-based practices and QI methods (29).

43  
44  
45 118 Another important factor that may influence an organization's readiness to change is the  
46  
47 119 involvement of leadership in QI interventions (34). The extent to which management sustains and  
48  
49 120 reinforces cultural change, establishes a positive relationship with front-line staff, and invests  
50  
51  
52 121 resources in the adoption of a new model of care, are crucial features for achieving a high standard  
53  
54 122 of care (29, 35). However, NH management is often characterized by a vertical hierarchal structure  
55  
56 123 that can hinder an open flow of communication and prevent all stakeholders from collaborating  
57  
58 124 fruitfully (36).

60

1  
2  
3 125 To date, no secondary studies have investigated the effectiveness of QI interventions to prevent  
4  
5 126 hospital services use among NH residents by exploring the factors that contribute to their success,  
6  
7  
8 127 such as delivery arrangements and implementation strategies. Therefore, this systematic review  
9  
10 128 aims to estimate the effectiveness of QI interventions and their implementation strategies in  
11  
12 129 reducing hospital service use among NH residents. In addition, given that the quality of QI  
13  
14  
15 130 interventions is often debated in the literature (37), the secondary aim is to assess the quality and  
16  
17 131 rigor of QI interventions by evaluating whether the solutions tested consider the fundamental  
18  
19 132 domains of a QI interventions, such as organizational readiness, implementation phase,  
20  
21  
22 133 sustainability, or adherence (38). Moreover, we will describe delivery arrangements and  
23  
24 134 implementation strategies of QI interventions.

### 27 135 **Research questions**

28  
29  
30 136 How effective are the QI interventions and implementation strategies aimed at preventing hospital  
31  
32 137 service use among NH residents?

33  
34  
35 138 What is the quality and rigor of the QI interventions provided in NHs?

### 38 39 139 **Methods and analysis**

40  
41  
42 140 The protocol complies with the Preferred Reporting Items for Systematic Reviews and Meta-  
43  
44 141 analyses Protocol (PRISMA-P) 2015 statement for reporting (39) (Supplementary material). It has  
45  
46 142 been registered in PROSPERO (CRD42022364195).

### 48 49 50 143 **Review conceptual model**

51  
52  
53 144 The review will be developed following the implementation research conceptual model proposed by  
54  
55 145 Proctor and collaborators (40). According to the model (Figure 1), QI intervention strategies and  
56  
57 146 implementation processes are separated but linked domains. In this review, QI strategies are defined  
58  
59 147 as organizational and system changes to reduce hospital services use. The implementation process

1  
2  
3 148 involves activities that transfer QI intervention strategies into clinical practice. Both domains  
4  
5 149 impact different but interrelated types of outcomes: implementation and resident outcomes.  
6  
7  
8 150 Implementation outcomes are used to assess the fidelity of implementation strategies. This review  
9  
10 151 aims to assess the effectiveness of QI intervention strategies on hospital service use, assuming that  
11  
12 152 this effect is mediated by implementation strategies and outcomes.  
13  
14

15 153 *Please insert Figure 1*  
16  
17

## 18 154 **Search strategy**

19  
20  
21  
22 155 Three steps will be used: a) a preliminary search of PubMed will be conducted to identify  
23  
24 156 keywords; b) peer-reviewed publications will be sought in the Medline, CINAHL, Cochrane  
25  
26 157 Library, Embase and Web of Science databases; grey literature will be excluded; and c) the  
27  
28  
29 158 reference lists of all eligible studies will be manually searched for additional papers.  
30

31  
32 159 The search strategy has been developed in collaboration with an expert librarian, by combining  
33  
34 160 terms according to the PICO framework. All terms were searched as controlled vocabulary and text  
35  
36 161 words with title and abstract field limiters, and combined with Boolean Operators (AND, OR). The  
37  
38  
39 162 research has been set from 2000, as no QI has been undertaken before this date (30), until  
40  
41 163 December 31, 2022, and will be re-run on September 1, 2023. No language limitations have been  
42  
43 164 applied. The full search strategy is available in the supplementary material.  
44  
45

46 165 Based on a recent international survey (41), an extensive list of terms referring to “nursing homes”  
47  
48  
49 166 has been included.  
50

51  
52 167 For the intervention concept, search terms which focus on “Quality improvement” or  
53  
54 168 “Organizational innovation” or “Quality Assurance, Health Care” or “Management Quality  
55  
56 169 Circles,” or on a formal model of QI intervention have been used (Plan Do Study Act (PDSA); Six  
57  
58  
59 170 Sigma (DMAIC and DMADV); Total Quality Management (TQM), Continuous Quality  
60  
171 Improvement (CQI), Focus Analyze Develop Execute (FADE)) (42). Moreover, terms concerning

1  
2  
3 172 implementation strategies have been used, including “Implementation Science,” “Program  
4  
5 173 Implementation,” or “Diffusion of Innovation.” Indeed, when complex interventions are introduced  
6  
7  
8 174 in a real-world context with the goal of changing health care professionals’ behaviours, the  
9  
10 175 implementation phase needs to be developed and planned along with the intervention itself (43).

11  
12  
13 176 For the outcomes, search terms focusing on “Hospital admissions” or “Emergency Service,  
14  
15 177 Hospital” have been used.

### 18 178 **Eligibility criteria**

19  
20  
21  
22 179 The review’s eligibility criteria will be identified based on the following elements of the PICO  
23  
24 180 framework:

25  
26  
27 181 *Types of participants/setting:* Long-stay nursing home residents, defined as persons who have been  
28  
29 182 institutionalized for at least 30 days. Residents requiring short-term NH or rehabilitation services  
30  
31 183 will be excluded. Studies that recruited mixed populations (short and long-term residents) that did  
32  
33 184 not present stratified results, as well as those undertaken in multiple settings (i.e., NHs, acute care  
34  
35 185 hospitals, home health agencies) and no opportunity to detect the impact of the QI in NH will be  
36  
37 186 excluded. NHs are defined as facilities that provide nursing care for people with functional or  
38  
39 187 cognitive disabilities and assist them with activities of daily living, with the aim of providing a safe  
40  
41 188 and supportive environment (44). Studies conducted in facilities providing accommodations,  
42  
43 189 without on-site nurses will be excluded.

44  
45  
46  
47  
48  
49 190 *Intervention(s):* This review will include studies focusing on the implementation of QI interventions  
50  
51 191 aimed at reducing hospital services use among NH residents. The Academy of Medical Royal  
52  
53 192 Colleges definition of QI will be used (16). Collaborative QI interventions will also be included  
54  
55 193 because of the importance of the model in healthcare setting (45).

56  
57  
58  
59 194 Empirical studies will be included if they 1) report measurable continuous local iterative testing of  
60  
195 solutions, 2) use real data to guide the change, 2) obtain practical contextual knowledge, and 3)

1  
2  
3 196 encompass at least one implementation strategy developed by the EPOC taxonomy of interventions  
4  
5 197 targeting healthcare workers (e.g., distribution of educational materials, educational meetings,  
6  
7 198 clinical practice guidelines, overcoming challenges to improving quality, local opinion leaders, etc)  
8  
9  
10 199 (20). These studies may or may not use a formal model (PDSA, Six Sigma, Total Quality  
11  
12 200 Management, etc.) or a framework for improvement.

13  
14  
15 201 Alternatives to QI strategies, such as research (studies that aim to produce generalizable knowledge,  
16  
17 202 testing a hypothesis, though a rigorous method), service evaluation (aims to assess current patient  
18  
19 203 care) or clinical transformation (radical or deep transformation activity without the iterative test of  
20  
21 204 change will be excluded) (46).

22  
23  
24  
25 205 *Types of comparison(s)*: Studies must have a control group that does not receive any QI  
26  
27 206 interventions or a historical cohort to compare the changes before and after the intervention.

28  
29  
30  
31 207 *Types of outcomes*: Primary outcome of the review will focus on hospitalizations, defined as the  
32  
33 208 acute admissions occurring for any conditions, while the secondary outcomes will include  
34  
35 209 hospitalizations at the end of life (last 60 days of life), potentially avoidable hospitalizations (as  
36  
37 210 defined by the authors, using all the existing metrics (8)), ED visits (the following terms will be  
38  
39 211 considered interchangeably “ED transfers” or “ED attendances” or “ED presentations” or  
40  
41 212 “Unplanned transfers”), and readmissions.

42  
43  
44  
45 213 Both subjective (e.g., self-reported by NH staff) or objective measure (e.g., hospital database) of  
46  
47 214 hospital service use will be collected.

48  
49  
50  
51 215 *Type of study designs*: Randomized Controlled Trials (RCTs), Non-Randomised Controlled Trials  
52  
53 216 (NRCTs), Uncontrolled Before- and- After trials (UBA) or Interrupted Time Series (ITS) designed  
54  
55 217 with at least three data points before and three after the intervention.

## 58 218 **Selecting studies**

59  
60

1  
2  
3 219 Two reviewers (I.B. and S.G.) independently performed the screening process to determine  
4  
5 220 eligibility. Zotero will be used as the reference manager software. First, the title and abstract will be  
6  
7  
8 221 evaluated; then, the full text of potentially eligible studies will be examined for compliance with the  
9  
10 222 inclusion criteria. Any disagreements will be resolved by a third author (AD).  
11  
12

### 13 223 **Risk-of-bias assessment**

14  
15  
16 224 Two independent reviewers will assess the risk of bias of the studies included in the review using  
17  
18 225 the JBI Critical Appraisal Tools, based on the study design (47). These tools provide a set of  
19  
20  
21 226 questions, that reviewers can answer with yes (i.e., criterion met), no (i.e., a criterion not met),  
22  
23 227 unclear or not applicable. No study will be excluded by the methodological quality assessment.  
24  
25

### 26 228 **Appraisal of the quality of QI interventions**

27  
28  
29 229 The quality of the QI interventions will be appraised for each included study using the QI Minimum  
30  
31 230 Quality Criteria Set (QI-MQCS) to inform the transferability of the best evidence into clinical  
32  
33  
34 231 practice (38). The QI-MQCS addresses the following core QI domains: organizational motivation,  
35  
36 232 intervention rationale, intervention description, organizational characteristics, implementation,  
37  
38  
39 233 study design, comparator, data source, timing, adherence/fidelity, health outcomes, organisational  
40  
41 234 readiness, penetration/reach, sustainability, spread and limitations.  
42  
43

### 44 235 **Data extraction**

45  
46  
47 236 Two members (IB and SG) of the research team will independently extract the following study  
48  
49 237 characteristics:

- 50  
51  
52 238 - Study details: Study design, date of publication, participants (NH organizational  
53  
54  
55 239 characteristics, ownership, size, etc), and study setting.
- 56  
57 240 - QI intervention details: Characteristics and implementation strategies, data on the formal  
58  
59 241 model used (if any), and information to appraise the quality of QI interventions (description



1  
2  
3 242 of organizational problems, reasons or motivations for the intervention, intervention  
4  
5 243 description, basic characteristics of the organization, etc) were extracted.  
6  
7  
8 244 - Hospital service use: Data on hospitalizations, potentially avoidable hospitalizations, end-of-  
9  
10 245 life hospitalizations, ED visits and readmissions.  
11

12 246  
13

### 14 247 **Data synthesis**

15  
16  
17  
18 248 Data from the included studies will be combined into a meta-analysis based on the outcomes. The  
19  
20 249 results will be pooled by combining the natural logarithms of the rate ratio across studies, or by  
21  
22 250 calculating the rate ratio using the generic inverse-variance method. We will use a permutation  
23  
24  
25 251 random-effect model to estimate meta-analysis effect. Heterogeneity will be assessed using the  
26  
27 252  $I^2$  statistics and we will consider high level of heterogeneity an  $I^2 > 75\%$ . Considering that the  
28  
29 253  $I^2$  statistics is biased in small meta-analysis, we will test heterogeneity with the  $H^2$  if it will be  
30  
31 254 included less than 10 studies. We choose an acceptable level of  $H^2$  under 1.88 with a confidence of  
32  
33 255 95% (48).  
34  
35

36  
37 256 Publication bias will be visually evaluated using funnel plot if more than 10 studies will be  
38  
39 257 included. We will request raw data from the authors when the reported outcomes in the included  
40  
41  
42 258 studies are not homogenous. All analyses will be performed using STATA/SE17 version.  
43

44  
45 259 A narrative synthesis will also be arranged. The characteristics of the included studies will be  
46  
47 260 synthesized and compared in a table. The characteristics of the QI and implementation strategies  
48  
49 261 will be deductively categorized into the EPOC taxonomy's domains on delivery arrangements and  
50  
51 262 implementation strategies, using all subcategories (20). The domains of governance and financial  
52  
53 263 arrangements will be excluded because they are beyond the scope of this review.  
54  
55

56  
57 264 **Patient and public involvement:** Patients and/or the public were not involved in this research's  
58  
59 265 design, conduct, reporting, or dissemination plans.  
60

## 266 **Ethics and dissemination**

267 Ethical approval is not required for this study as it is a review based on published studies. The  
268 findings of this systematic review and meta-analysis will support clinical and organizational  
269 decision-making by determining which QI interventions effectively prevent the use of hospital  
270 services and identifying which implementation strategies are most successful in fostering adherence  
271 to organizational and system changes within NH settings. The results of this study will be presented  
272 at a scientific conference and submitted to a peer-reviewed journal for publication.

## 273 **References**

- 274 1. World Health Organization. Ageing. 2021. [https://www.who.int/health-topics/ageing#tab=tab\\_1](https://www.who.int/health-topics/ageing#tab=tab_1).  
275 Accessed 26 Dec 2022.
- 276 2. Sverdrup K, Bergh S, Selbæk G, Benth JS, Røen IM, Husebo B, Tangen GG. Trajectories of physical  
277 performance in nursing home residents with dementia. *Aging Clin Exp Res*. 2020 Dec;32(12):2603-2610.  
278 doi: 10.1007/s40520-020-01499-y.
- 279 3. Li S, Middleton A, Ottenbacher KJ, Goodwin JS. Trajectories Over the First Year of Long-Term  
280 Care Nursing Home Residence. *J Am Med Dir Assoc*. 2018 Apr;19(4):333-341. doi:  
281 10.1016/j.jamda.2017.09.021.
- 282 4. Kirsebom M, Hedström M, Wadensten B, Pöder U. The frequency of and reasons for acute hospital  
283 transfers of older nursing home residents. *Arch Gerontol Geriatr*. 2014 Jan-Feb;58(1):115-20. doi:  
284 10.1016/j.archger.2013.08.002.
- 285 5. Simo N, Cesari M, Tchiero H, Rolland Y, de Souto Barreto P, Dartigues JF, Vellas B, Tabue-Teguo  
286 M. Frailty Index, Hospital Admission and Number of Days Spent in Hospital in Nursing Home Residents:  
287 Results from the Incur Study. *J Nutr Health Aging*. 2021;25(2):155-159. doi: 10.1007/s12603-020-1561-7.
- 288 6. Hoffmann F, Allers K. Age and sex differences in hospitalisation of nursing home residents: a  
289 systematic review. *BMJ Open*. 2016 Oct 8;6(10):e011912. doi: 10.1136/bmjopen-2016-011912.

- 1  
2  
3 290 7. Dwyer R, Gabbe B, Stoelwinder JU, Lowthian J. A systematic review of outcomes following  
4  
5 291 emergency transfer to hospital for residents of aged care facilities. *Age Ageing*. 2014 Nov;43(6):759-66. doi:  
6  
7 292 10.1093/ageing/afu117.  
8  
9 293 8. Lemoyne SE, Herbots HH, De Blick D, Remmen R, Monsieurs KG, Van Bogaert P. Appropriateness  
10  
11 294 of transferring nursing home residents to emergency departments: a systematic review. *BMC Geriatr*. 2019  
12  
13 295 Jan 21;19(1):17. doi: 10.1186/s12877-019-1028-z.  
14  
15  
16 296 9. Ouslander JG, Lamb G, Perloe M, Givens JH, Kluge L, Rutland T, Atherly A, Saliba D. Potentially  
17  
18 297 avoidable hospitalizations of nursing home residents: frequency, causes, and costs: [see editorial comments  
19  
20 298 by Drs. Jean F. Wyman and William R. Hazzard, pp 760-761]. *J Am Geriatr Soc*. 2010 Apr;58(4):627-35.  
21  
22 299 doi: 10.1111/j.1532-5415.2010.02768.x.  
23  
24 300 10. Frick J, Möckel M, Muller R, Searle J, Somasundaram R, Slagman A. Suitability of current  
25  
26 301 definitions of ambulatory care sensitive conditions for research in emergency department patients: a  
27  
28 302 secondary health data analysis. *BMJ Open*. 2017 Oct 22;7(10):e016109. doi: 10.1136/bmjopen-2017-  
29  
30 303 016109.  
31  
32 304 11. Trahan LM, Spiers JA, Cummings GG. Decisions to Transfer Nursing Home Residents to Emergency  
33  
34 305 Departments: A Scoping Review of Contributing Factors and Staff Perspectives. *J Am Med Dir Assoc*. 2016  
35  
36 306 Nov 1;17(11):994-1005. doi: 10.1016/j.jamda.2016.05.012. Epub 2016 Jun 24  
37  
38  
39 307 12. Pimsen A, Kao CY, Hsu ST, Shu BC. The Effect of Advance Care Planning Intervention on  
40  
41 308 Hospitalization Among Nursing Home Residents: A Systematic Review and Meta-Analysis. *J Am Med Dir*  
42  
43 309 *Assoc*. 2022 Sep;23(9):1448-1460.e1. doi: 10.1016/j.jamda.2022.07.017. Epub 2022 Aug 11.  
44  
45 310 13. Toles M, Colón-Emeric C, Moreton E, Frey L, Leeman J. Quality improvement studies in nursing  
46  
47 311 homes: a scoping review. *BMC Health Serv Res*. 2021 Aug 12;21(1):803. doi: 10.1186/s12913-021-06803-8  
48  
49 312 14. Mileski M, Topinka JB, Lee K, Brooks M, McNeil C, Jackson J. An investigation of quality  
50  
51 313 improvement initiatives in decreasing the rate of avoidable 30-day, skilled nursing facility-to-hospital  
52  
53 314 readmissions: a systematic review. *Clin Interv Aging*. 2017 Jan 25;12:213-222. doi: 10.2147/CIA.S123362.  
54  
55  
56 315 15. Chadborn NH, Devi R, Hinsliff-Smith K, Banerjee J, Gordon AL. Quality improvement in long-term  
57  
58 316 care settings: a scoping review of effective strategies used in care homes. *Eur Geriatr Med*. 2021  
59  
60 317 Feb;12(1):17-26. doi: 10.1007/s41999-020-00389-w.

1  
2  
3  
4  
5  
6  
7  
8  
9  
10  
11  
12  
13  
14  
15  
16  
17  
18  
19  
20  
21  
22  
23  
24  
25  
26  
27  
28  
29  
30  
31  
32  
33  
34  
35  
36  
37  
38  
39  
40  
41  
42  
43  
44  
45  
46  
47  
48  
49  
50  
51  
52  
53  
54  
55  
56  
57  
58  
59  
60

16. Academy of Medical Royal Collages. Quality Improvement-training for better outcomes. 2016. <https://www.aomrc.org.uk/reports-guidance/quality-improvement-training-better-outcomes/> . Accessed 02 Apr 2022.
17. The Health Foundation. Quality improvement made simple. 2021 <https://www.health.org.uk/publications/quality-improvement-made-simple>. Accessed 12 Apr 2022.
18. Woo K, Milworm G, Dowding D. Characteristics of Quality Improvement Champions in Nursing Homes: A Systematic Review With Implications for Evidence-Based Practice. *Worldviews Evid Based Nurs*. 2017 Dec;14(6):440-446. doi: 10.1111/wvn.12262
19. Grimshaw J, McAuley LM, Bero LA, Grilli R, Oxman AD, Ramsay C, Vale L, Zwarenstein M. Systematic reviews of the effectiveness of quality improvement strategies and programmes. *Qual Saf Health Care*. 2003 Aug;12(4):298-303. doi: 10.1136/qhc.12.4.298.
20. Effective Practice and Organisation of Care (EPOC). EPOC Taxonomy-topics list Delivery Arrangements. [epoc.cochrane.org/epoc-taxonomy](http://epoc.cochrane.org/epoc-taxonomy). Accessed 02 Mar 2022.
21. Nicolay CR, Purkayastha S, Greenhalgh A, Benn J, Chaturvedi S, Phillips N, Darzi A. Systematic review of the application of quality improvement methodologies from the manufacturing industry to surgical healthcare. *Br J Surg*. 2012 Mar;99(3):324-35. doi: 10.1002/bjs.7803. Epub 2011 Nov 18
22. Buljac-Samardzic M, Doekhie KD, van Wijngaarden JDH. Interventions to improve team effectiveness within health care: a systematic review of the past decade. *Hum Resour Health*. 2020 Jan 8;18(1):2. doi: 10.1186/s12960-019-0411-3.
23. Tricco AC, Thomas SM, Veroniki AA, Hamid JS, Cogo E, Strifler L, Khan PA, Sibley KM, Robson R, MacDonald H, Riva JJ, Thavorn K, Wilson C, Holroyd-Leduc J, Kerr GD, Feldman F, Majumdar SR, Jaglal SB, Hui W, Straus SE. Quality improvement strategies to prevent falls in older adults: a systematic review and network meta-analysis. *Age Ageing*. 2019 May 1;48(3):337-346. doi: 10.1093/ageing/afy219.
24. McCleskey SG, Shek L, Grein J, Gotanda H, Anderson L, Shekelle PG, Keeler E, Morton S, Nuckols TK. Economic evaluation of quality improvement interventions to prevent catheter-associated urinary tract infections in the hospital setting: a systematic review. *BMJ Qual Saf*. 2022 Apr;31(4):308-321. doi: 10.1136/bmjqs-2021-013839. Epub 2021 Nov 25.

- 1  
2  
3 345 25. Levy C, Au D, Ozkaynak M. Innovation and Quality Improvement: Safe or Sabotage in Nursing Homes?  
4 346 J Am Med Dir Assoc. 2021 Aug;22(8):1670-1671. doi: 10.1016/j.jamda.2021.06.026. PMID: 34334162.  
5  
6 347 26. Alexander JA, Hearld LR. What can we learn from quality improvement research? A critical review  
7  
8 348 of research methods. Med Care Res Rev. 2009 Jun;66(3):235-71. doi: 10.1177/1077558708330424.  
9  
10 349 27. Ouslander JG, Lamb G, Tappen R, Herndon L, Diaz S, Roos BA, Grabowski DC, Bonner A.  
11  
12 350 Interventions to reduce hospitalizations from nursing homes: evaluation of the INTERACT II collaborative  
13  
14 351 quality improvement project. J Am Geriatr Soc. 2011 Apr;59(4):745-53. doi: 10.1111/j.1532-  
15  
16 352 5415.2011.03333.x. Epub 2011 Mar 15.  
17  
18 353 28. Ouslander JG, Reyes B, Yang Z, Engstrom G, Tappen R, Newman D, Huckfeldt PJ. Nursing home  
19  
20 354 performance in a trial to reduce hospitalizations: Implications for future trials. J Am Geriatr Soc. 2021  
21  
22 355 Aug;69(8):2316-2326. doi: 10.1111/jgs.17231.  
23  
24 356 29. Rantz MJ, Zwiygart-Stauffacher M, Flesner M, Hicks L, Mehr D, Russell T, Minner D. Challenges of  
25  
26 357 using quality improvement methods in nursing homes that "need improvement". J Am Med Dir Assoc. 2012  
27  
28 358 Oct;13(8):732-8. doi: 10.1016/j.jamda.2012.07.008.  
29  
30 359 30. Kaplan HC, Brady PW, Dritz MC, Hooper DK, Linam WM, Froehle CM, Margolis P. The influence  
31  
32 360 of context on quality improvement success in health care: a systematic review of the literature. Milbank Q.  
33  
34 361 2010 Dec;88(4):500-59. doi: 10.1111/j.1468-0009.2010.00611.x  
35  
36 362 31. Mills WL, Pimentel CB, Snow AL, Allen RS, Wewiorski NJ, Palmer JA, Clark V, Roland TM,  
37  
38 363 McDannold SE, Hartmann CW. Nursing Home Staff Perceptions of Barriers and Facilitators to  
39  
40 364 Implementing a Quality Improvement Intervention. J Am Med Dir Assoc. 2019 Jul;20(7):810-815. doi:  
41  
42 365 10.1016/j.jamda.2019.01.139.  
43  
44 366 32. Palmer JA, Parker VA, Mor V, Volandes AE, Barre LR, Belanger E, Carter P, Loomer L, McCreedy  
45  
46 367 E, Mitchell SL. Barriers and facilitators to implementing a pragmatic trial to improve advance care planning  
47  
48 368 in the nursing home setting. BMC Health Serv Res. 2019 Jul 29;19(1):527. doi: 10.1186/s12913-019-4309-5.  
49  
50 369 33. Gagnon MM, Hadjistavropoulos T, Williams J. Development and mixed-methods evaluation of a  
51  
52 370 pain assessment video training program for long-term care staff. Pain Res Manag. 2013 Nov-Dec;18(6):307-  
53  
54 371 12. doi: 10.1155/2013/659320.  
55  
56  
57  
58  
59  
60

1

2

- 3 372 34. Scoville R, Little K, Rakover J, Luther K, Mate K. Sustaining Improvement. IHI White Paper.  
4  
5 373 Cambridge. 2016. <https://www.ihl.org>. Accessed 15 Feb 2022.
- 6  
7 374 35. Hickman SE, Miech EJ, Stump TE, Fowler NR, Unroe KT. Identifying the Implementation  
8  
9 375 Conditions Associated With Positive Outcomes in a Successful Nursing Facility Demonstration Project.  
10  
11 376 Gerontologist. 2020 Nov 23;60(8):1566-1574. doi: 10.1093/geront/gnaa041
- 12  
13 377 36. Wicke D, Coppin R, Payne S. Teamworking in nursing homes. J Adv Nurs. 2004 Jan;45(2):197-204.  
14  
15  
16 378 doi: 10.1046/j.1365-2648.2003.02881.x.
- 17  
18 379 37. Fan E, Laupacis A, Pronovost PJ, Guyatt GH, Needham DM. How to use an article about quality  
19  
20 380 improvement. JAMA. 2010 Nov 24;304(20):2279-87. doi: 10.1001/jama.2010.1692.
- 21  
22 381 38. Hempel S, Shekelle PG, Liu JL, Sherwood Danz M, Foy R, Lim YW, Motala A, Rubenstein LV.  
23  
24 382 Development of the Quality Improvement Minimum Quality Criteria Set (QI-MQCS): a tool for critical  
25  
26 383 appraisal of quality improvement intervention publications. BMJ Qual Saf. 2015 Dec;24(12):796-804. doi:  
27  
28 384 10.1136/bmjqs-2014-003151.
- 29  
30 385 39. Moher D, Shamseer L, Clarke M, Ghersi D, Liberati A, Petticrew M, et al. Preferred reporting items for  
31  
32 386 systematic review and meta-analysis protocols (PRISMA-P) 2015 statement. 2015.  
33  
34  
35 387 <http://www.crd.york.ac.uk/prospero>. Accessed 4 Mar 4 2022.
- 36  
37 388 40. Proctor EK, Landsverk J, Aarons G, Chambers D, Glisson C, Mittman B. Implementation research in  
38  
39 389 mental health services: an emerging science with conceptual, methodological, and training challenges. Adm  
40  
41 390 Policy Ment Health. 2009 Jan;36(1):24-34. doi: 10.1007/s10488-008-0197-4.
- 42  
43 391 41. Burton JK, Quinn TJ, Gordon AL, MacLulich AMJ, Reynish EL, Shenkin SD. Identifying published  
44  
45 392 studies of care home research: an international survey of researchers. J Nurs Home Res Sci. 2017.  
46  
47 393 <https://www.jnursinghomeresearch.com/all-issues.html?article=150>. Accessed 15 May 2022. McPheeters  
48  
49 394 ML, Sunil Kripalani M, Peterson NB, Idowu RT, Jerome RN, Shannon Potter MA, et al. Quality  
50  
51 395 Improvement Interventions To Address Health Disparities. 2012. www.ahrq.gov cite. Accessed 12 Feb 2022
- 52  
53 396 43. Skivington K, Matthews L, Simpson SA, Craig P, Baird J, Blazeby JM, Boyd KA, Craig N, French  
54  
55 397 DP, McIntosh E, Petticrew M, Rycroft-Malone J, White M, Moore L. A new framework for developing and  
56  
57 398 evaluating complex interventions: update of Medical Research Council guidance. BMJ. 2021 Sep  
58  
59 399 30;374:n2061. doi: 10.1136/bmj.n2061.

1  
2  
3  
4  
5  
6  
7  
8  
9  
10  
11  
12  
13  
14  
15  
16  
17  
18  
19  
20  
21  
22  
23  
24  
25  
26  
27  
28  
29  
30  
31  
32  
33  
34  
35  
36  
37  
38  
39  
40  
41  
42  
43  
44  
45  
46  
47  
48  
49  
50  
51  
52  
53  
54  
55  
56  
57  
58  
59  
60

- 400 44. Sanford AM, Orrell M, Tolson D, Abbatecola AM, Arai H, Bauer JM, Cruz-Jentoft AJ, Dong B, Ga  
401 H, Goel A, Hajjar R, Holmerova I, Katz PR, Koopmans RT, Rolland Y, Visvanathan R, Woo J, Morley JE,  
402 Vellas B. An international definition for "nursing home". J Am Med Dir Assoc. 2015 Mar;16(3):181-4. doi:  
403 10.1016/j.jamda.2014.12.013.
- 404 45. Wells S, Tamir O, Gray J, Naidoo D, Bekhit M, Goldmann D. Are quality improvement  
405 collaboratives effective? A systematic review. BMJ Qual Saf. 2018 Mar;27(3):226-240. doi: 10.1136/bmjqs-  
406 2017-006926
- 407 46. Backhouse A, Ogunlayi F. Quality improvement into practice. BMJ. 2020 Mar 31;368:m865. doi:  
408 10.1136/bmj.m865.
- 409 47. Tufanaru C MZAECJHL. Chapter 3: Systematic reviews of effectiveness. In: Aromataris E, Munn Z  
410 (Editors). JBI Manual for Evidence Synthesis. JBI. 2020. <https://synthesismanual.jbi.global> Accessed 20 Jan  
411 2023..
- 412 48. Mona P, Sada Nand D, SVS D, V Sreenivas, Bhaskar T. Which is the Preferred Measure of  
413 Heterogeneity. Meta-Analysis and Why? A Revisit. Biostat Biometrics Open Acc J. 2017;1(1): 555555.  
414 DOI: 10.19080/BBOAJ.2017.01.555555 020)

**Contributors:** IB, ADM, SC, SG, EB, and SC jointly contributed to the study aims, research design and methodology. IB, SG, SC and EB produced the first draft of the article outline with the guidance of SC, and ADM. IB and EB designed the search strategy. All authors (IB, ADM, SC, SG, SC, EB) contributed substantially to the manuscript and critically revised the content. All authors read and approved the final version of the manuscript.

**Funding:** This study was funded by the Italian Ministry of University and Research (MUR) program "Departments of Excellence 2023-2027", AGING Project – Department of Translational Medicine, Università del Piemonte Orientale

**Competing interests:** None declared

**Patient consent for publication:** Not applicable.

1  
2  
3 426 **Acknowledgements:** The authors would like to thank Ms Maoret Roberta of the Biblioteca Virtuale  
4  
5 427 per la Salute – Piemonte - for her support in the development of the search strategy.  
6  
7

8 428 **Figure 1 Legend: Adaptation of the implementation research conceptual model (40).** QI intervention and implementation  
9 strategies are interconnected domains that influence both implementation and resident outcomes.  
10 429  
11  
12

13 430  
14  
15  
16  
17  
18  
19  
20  
21  
22  
23  
24  
25  
26  
27  
28  
29  
30  
31  
32  
33  
34  
35  
36  
37  
38  
39  
40  
41  
42  
43  
44  
45  
46  
47  
48  
49  
50  
51  
52  
53  
54  
55  
56  
57  
58  
59  
60

For peer review only



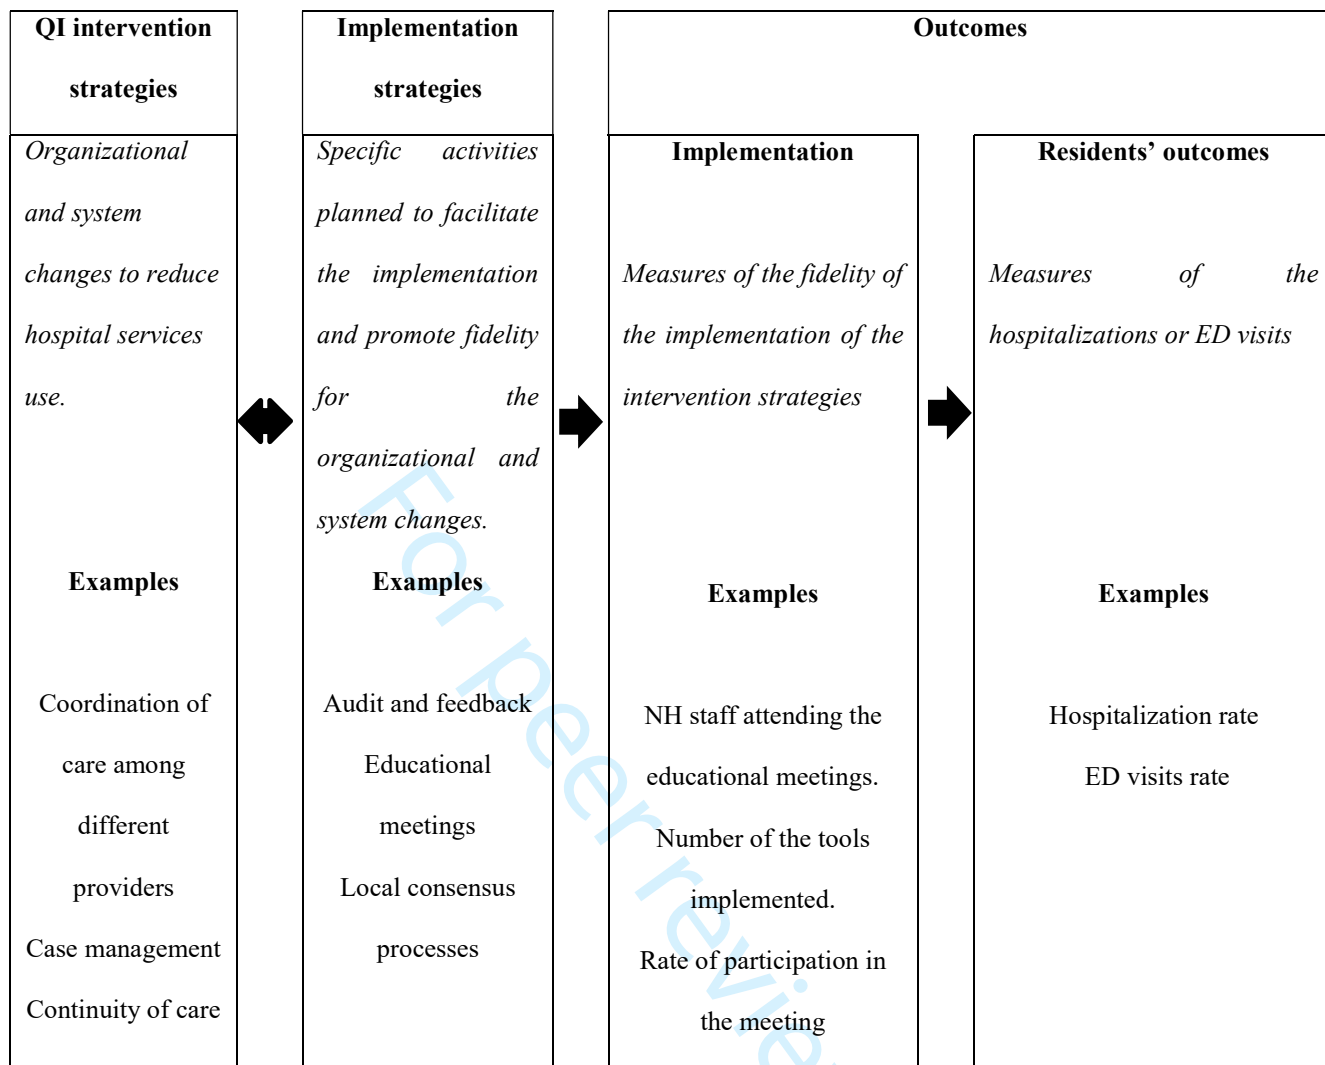

Figure 1

| PubMed (Searched 31 <sup>th</sup> December 2022) |                                                                                                                                                                                                                                                                                                                                                                                                                                                                                                                                                                                                                                                                                                                                                                                                                                                                                                                                                                                                                                                                                                                                                                                                                                                                                                                                                                                                                                                                                                                                                                                                                                                                                                                                                                                                                                                                                                                                                                                                                                                                                                                                                                                                                                                                                                                                                                                                                                                                              |           |
|--------------------------------------------------|------------------------------------------------------------------------------------------------------------------------------------------------------------------------------------------------------------------------------------------------------------------------------------------------------------------------------------------------------------------------------------------------------------------------------------------------------------------------------------------------------------------------------------------------------------------------------------------------------------------------------------------------------------------------------------------------------------------------------------------------------------------------------------------------------------------------------------------------------------------------------------------------------------------------------------------------------------------------------------------------------------------------------------------------------------------------------------------------------------------------------------------------------------------------------------------------------------------------------------------------------------------------------------------------------------------------------------------------------------------------------------------------------------------------------------------------------------------------------------------------------------------------------------------------------------------------------------------------------------------------------------------------------------------------------------------------------------------------------------------------------------------------------------------------------------------------------------------------------------------------------------------------------------------------------------------------------------------------------------------------------------------------------------------------------------------------------------------------------------------------------------------------------------------------------------------------------------------------------------------------------------------------------------------------------------------------------------------------------------------------------------------------------------------------------------------------------------------------------|-----------|
| Search                                           | Query                                                                                                                                                                                                                                                                                                                                                                                                                                                                                                                                                                                                                                                                                                                                                                                                                                                                                                                                                                                                                                                                                                                                                                                                                                                                                                                                                                                                                                                                                                                                                                                                                                                                                                                                                                                                                                                                                                                                                                                                                                                                                                                                                                                                                                                                                                                                                                                                                                                                        | Items     |
| # 1                                              | ("Nursing Homes" [Mesh] OR "Nursing home*" [Title/Abstract] OR "Homes for the Aged" [Mesh] OR "Geriatric Home*" [Title/Abstract] OR "Old age home*" [Title/Abstract] OR "Home, old age" [Title/Abstract] OR "Homes, old age" [Title/Abstract] OR "Old people home*" [Title/Abstract] OR "Old people's home*" [Title/Abstract] OR "Long-Term Care" [Mesh] OR "Long-Term Care" [Title/Abstract] OR "Long Term Care" [Title/Abstract] OR "Long term facilit*" [Title/Abstract] OR "long-term facilit*" [Title/Abstract] OR "Skilled Nursing Facilities"[Mesh] OR "Skilled Nursing Facilit*" [Title/Abstract] OR "Care home*" [Title/Abstract] OR "Residential Facilities"[Mesh] OR "Residential facilit*" [Title/Abstract] OR "Residential home*" [Title/Abstract] OR "Residential institution*" [Title/abstract] OR "Institutional care*" [Title/Abstract] OR "Care facilit*" [Title/Abstract] OR "Continuing care*" [Title/Abstract] OR "Subacute Care"[Mesh] OR "Sub-acute care" [Title/Abstract] OR "Medical home*" [Title/Abstract] OR "Medical care" [Title/Abstract] OR "Extended care facilit*" [Title/Abstract] OR "Assisted Living Facilities"[Mesh] OR "Assisted living facility*" [Title/abstract] OR "Assisted living" [Title/Abstract] OR "Skilled care" [Title/Abstract] OR "Restorative care" [Title/Abstract] OR "Retirement center" [Title/Abstract] OR "Retirement centre" [Title/Abstract] OR "Retirement home" [Title/Abstract] OR "Senior residence facilit*" [Title/Abstract])                                                                                                                                                                                                                                                                                                                                                                                                                                                                                                                                                                                                                                                                                                                                                                                                                                                                                                                                                                           | 190,129   |
| #2                                               | ("Quality Improvement"[Mesh] OR "Quality improvement" [Title/Abstract] OR "Improvement Quality" [Title/Abstract] OR "Organizational Innovation"[Mesh] OR "Organizational innovation" [Title/Abstract] OR "Organisational innovation" [Title/Abstract] OR "Quality Assurance, Health Care"[Mesh] OR "Health Care Quality Assurance" [Title/Abstract] OR "Quality assurance, health care" [Title/Abstract] OR "Program Evaluation"[Mesh] OR "Program Evaluation*" [Title/Abstract] OR "Program effectiveness" [Title/Abstract] OR "Healthcare Quality Assurance" [Title/Abstract] OR "Management Quality Circles"[Mesh] OR "Management Quality Circles" [Title/abstract] OR "Total Quality Management"[Mesh] OR "Quality Management" [Title/Abstract] OR "Management, Total Quality" [Title/Abstract] OR "Total Quality Management" [Title/Abstract] OR "Clinical Governance"[Mesh] OR "Outcome Assessment, Health Care"[Majr] OR "Healthcare outcome assessment" [Title/Abstract] OR "Health Care outcome assessment" [Title/Abstract] OR "Process Assessment, Health Care"[Majr] OR "Process assessment, health care" [Title/Abstract] OR "Outcome measure" [Title/Abstract] OR "Outcome assessment" [Title/Abstract] OR "Health Care Process Assessment" [Title/Abstract] OR "Healthcare Process Assessment" [Title/Abstract] OR TQM [Title/Abstract] OR "Plan Do Study Act" [Title/Abstract] OR PDSA [Title/Abstract] OR "Plan Do Check Act" [Title/Abstract] OR PDCA [Title/Abstract] OR "Six Sigma" [Title/Abstract] OR Lean [Title/Abstract] OR DMAIC [Title/Abstract] OR DMADV [Title/Abstract] OR "Continuous Quality Improvement" [Title/Abstract] OR CQI [Title/Abstract] OR "Focus Analyse Develop Execute" [Title/Abstract] OR FADE [Title/Abstract] OR "Collaborative Quality Improvement*" [Title/Abstract] OR "Quality Improvement Collaborative*" [Title/Abstract] OR "Performance Improvement*" [Title/Abstract] or "Collaborative Improvement" [Title/Abstract] OR "Implementation Science"[Mesh] OR "Implement*" [Title/Abstract] OR ADOPT* [Title/Abstract] OR feedback [Title/Abstract] or "professional development" [Title/Abstract] or network* [Title/Abstract] or leadership [Title/Abstract] or opinion leader* [Title/Abstract] or "consensus process*" [Title/Abstract] or "change manage*" [Title/Abstract] or train* [Title/Abstract] or audit* [Title/Abstract] OR "root cause analysis" [Title/Abstract] OR "Diffusion of Innovation"[Mesh]) | 2,915,751 |
| #3                                               | ("Emergency Service, Hospital" [Mesh] OR "Hospital Emergency Service*" [Title/Abstract] OR "Emergency Hospital Service*" [Title/Abstract] OR "Emergency unit*" [Title/Abstract] OR "Unit Emergency" [Title/Abstract] OR "Units Emergency" [Title/Abstract] OR "Emergency Ward*" [Title/Abstract] OR "Ward Emergency" [Title/Abstract] OR "Wards Emergency" [Title/Abstract] OR "Emergency Department*" [Title/Abstract] OR "Room Emergency" [Title/Abstract] OR "Emergency Room*" [Title/Abstract] OR "Emergency Outpatient Unit*" [Title/Abstract] OR "Department Emergency" [Title/Abstract] OR "Departments Emergency" [Title/Abstract] OR "Outpatient Unit Emergency" [Title/Abstract] OR "Outpatient Units Emergency" [Title/Abstract] OR "Patient Admission"                                                                                                                                                                                                                                                                                                                                                                                                                                                                                                                                                                                                                                                                                                                                                                                                                                                                                                                                                                                                                                                                                                                                                                                                                                                                                                                                                                                                                                                                                                                                                                                                                                                                                                           | 1,032,253 |

|    |                                                                                                                                                                                                                                                                                                                                                                                                                                                                                                                                                                                                                                                         |       |
|----|---------------------------------------------------------------------------------------------------------------------------------------------------------------------------------------------------------------------------------------------------------------------------------------------------------------------------------------------------------------------------------------------------------------------------------------------------------------------------------------------------------------------------------------------------------------------------------------------------------------------------------------------------------|-------|
|    | [Mesh] OR Admission* [Title/Abstract] OR "Hospitalization"[Mesh] OR Hospitali* [Title/Abstract] OR "Hospital Transfer*" [Title/Abstract] OR "Hospital Admittance" [Title/Abstract] OR "Hospital Stay" [Title/Abstract] OR "Patient Readmission" [Mesh] OR Readmission* [Title/abstract] OR "Patient Transfer"[Mesh] OR "Emergency Treatment"[Mesh] OR "Acute care" [Title/Abstract] OR "Emergency care" [Title/Abstract] OR "Critical care" [Title/Abstract] OR "Acute service*" [Title/Abstract] OR "Emergency service*" [Title/Abstract] OR "Critical service*" [Title/Abstract] OR "Transitional Care"[Mesh] OR "Transitional care" [Title/Abstract] |       |
| #4 | #1 AND #2 AND #3 AND (2000:2022[pdat])                                                                                                                                                                                                                                                                                                                                                                                                                                                                                                                                                                                                                  | 8,058 |

| CINAHL Complete (Searched 31th December 2022) |                                                                                                                                                                                                                                                                                                                                                                                                                                                                                                                                                                                                                                                                                                                                                                                                                                                                                                                                                                                                                                                                                                                                                                                                                                                                                                                                                                                                                                                                                                                                                                                                                                                                                                                                                                                                                                                                                                                                                                                                                                                                                                                                                             |         |
|-----------------------------------------------|-------------------------------------------------------------------------------------------------------------------------------------------------------------------------------------------------------------------------------------------------------------------------------------------------------------------------------------------------------------------------------------------------------------------------------------------------------------------------------------------------------------------------------------------------------------------------------------------------------------------------------------------------------------------------------------------------------------------------------------------------------------------------------------------------------------------------------------------------------------------------------------------------------------------------------------------------------------------------------------------------------------------------------------------------------------------------------------------------------------------------------------------------------------------------------------------------------------------------------------------------------------------------------------------------------------------------------------------------------------------------------------------------------------------------------------------------------------------------------------------------------------------------------------------------------------------------------------------------------------------------------------------------------------------------------------------------------------------------------------------------------------------------------------------------------------------------------------------------------------------------------------------------------------------------------------------------------------------------------------------------------------------------------------------------------------------------------------------------------------------------------------------------------------|---------|
| Search                                        | Query                                                                                                                                                                                                                                                                                                                                                                                                                                                                                                                                                                                                                                                                                                                                                                                                                                                                                                                                                                                                                                                                                                                                                                                                                                                                                                                                                                                                                                                                                                                                                                                                                                                                                                                                                                                                                                                                                                                                                                                                                                                                                                                                                       | Items   |
| #1                                            | ((MH "Nursing Home Patients") OR (MH "Home Nursing") OR (MH "Nursing Homes") OR (MH "Residential Care") OR (MH "Housing for the Elderly") OR (MH "Long Term Care") OR (MH "Skilled Nursing Facilities") OR (MH "Residential Facilities") OR TI ("Nursing home*" OR "Geriatric home*" OR "Care home*" OR "care facilit*" OR "skilled nursing facilit*" OR "residential facilit*" OR "home* for aged" OR "long-term care*" OR "long term care*" OR "residential home*" OR "assisted living facilit*" OR "institutional care" OR "retirement home*" OR "retirement centre" OR "retirement center" OR "old people home" OR "old people homes" OR "continuing care" OR "Medical home*" OR "Medical care" OR "senior residence facility*") OR AB ("Nursing home*" OR "Geriatric home*" OR "Care home*" OR "care facilit*" OR "skilled nursing facilit*" OR "residential facilit*" OR "home* for aged" OR "long-term care*" OR "long term care*" OR "residential home*" OR "assisted living facilit*" OR "institutional care" OR "retirement home*" OR "retirement centre" OR "retirement center" OR "old people home" OR "old people homes" OR "continuing care" OR "Medical home*" OR "Medical care" OR "senior residence facility*"))                                                                                                                                                                                                                                                                                                                                                                                                                                                                                                                                                                                                                                                                                                                                                                                                                                                                                                                           | 128,129 |
| #2                                            | ((MH "Quality Improvement+") OR (MH "Evaluation and Quality Improvement Program") OR (MH "Quality Management, Organizational") OR (MH "Quality Assurance") OR (MH "Quality Circles") OR (MH "Clinical Governance") OR (MH "Program Evaluation") OR (MH "Outcome Assessment") OR (MH "Process Assessment (Health Care)") OR TI ("Quality improvement*" OR "Improvement quality" OR "Health care quality assurance" OR "Health-care quality assurance" OR "Quality assurance" OR "Organizational innovation" OR "Outcome assessment" OR "Process assessment" OR "program evaluation" OR "Program effectiveness" OR "Quality management" OR "Management, total quality" OR "Clinical Governance" OR "Outcome measure" OR "Health Care Process Assessment" OR "Healthcare Process Assessment" OR TQM OR "Plan Do Study Act" OR PDSA OR "Plan Do Check Act" OR PDCA OR "Six Sigma" OR Lean OR DMAIC OR DMADV "Continuous Quality Improvement" OR CQI OR "Focus Analyse Develop Execute" OR FADE OR "Collaborative Quality Improvement" OR "Quality Improvement Collaborative") OR AB ("Quality improvement*" OR "Improvement quality" OR "Health care quality assurance" OR "Health-care quality assurance" OR "Quality assurance" OR "Organizational innovation" OR "Outcome assessment" OR "Process assessment" OR "program evaluation" OR "Program effectiveness" OR "Quality management" OR "Management, total quality" OR "Clinical Governance" OR "Outcome measure" OR "Health Care Process Assessment" OR "Healthcare Process Assessment" OR TQM OR "Plan Do Study Act" OR PDSA OR "Plan Do Check Act" OR PDCA OR "Six Sigma" OR Lean OR DMAIC OR DMADV "Continuous Quality Improvement" OR CQI OR "Focus Analyse Develop Execute" OR FADE OR "Collaborative Quality Improvement" OR "Quality Improvement Collaborative" OR (MH "Implementation Science") OR "implementation science" OR (MH "Program Implementation") OR (MH "Systems Implementation") OR (MH "Root Cause Analysis") OR "implementation" OR (MH "Organizational Development") OR (MH "Audit") OR (MH "Change Management") OR (MH "Organizational Change") OR "Local consensus process")) | 393,141 |
| #3                                            | ((MH "Emergency Service") OR (MH "Hospitalization") OR (MH "Aged, Hospitalized") OR (MH "Hospitals") OR (MH "Patient Admission") OR (MH "Observation Units") OR                                                                                                                                                                                                                                                                                                                                                                                                                                                                                                                                                                                                                                                                                                                                                                                                                                                                                                                                                                                                                                                                                                                                                                                                                                                                                                                                                                                                                                                                                                                                                                                                                                                                                                                                                                                                                                                                                                                                                                                             | 432,718 |

|    |                                                                                                                                                                                                                                                                                                                                                                                                                                                                                                                                                                                                                                                                                                                                                                                                                                                                                                                                                                                                                                                                                                                                                                                                                                                                                                                                                                       |             |
|----|-----------------------------------------------------------------------------------------------------------------------------------------------------------------------------------------------------------------------------------------------------------------------------------------------------------------------------------------------------------------------------------------------------------------------------------------------------------------------------------------------------------------------------------------------------------------------------------------------------------------------------------------------------------------------------------------------------------------------------------------------------------------------------------------------------------------------------------------------------------------------------------------------------------------------------------------------------------------------------------------------------------------------------------------------------------------------------------------------------------------------------------------------------------------------------------------------------------------------------------------------------------------------------------------------------------------------------------------------------------------------|-------------|
|    | <p>(MH "Readmission") OR (MH "Transfer, Discharge") OR (MH "Emergency Treatment" OR (MH "Transitional Care") OR TI ("Hospital Emergency Service*" OR "Emergency Hospital Service*" OR "Emergency unit*" OR "Unit* Emergency" OR "Emergency Ward*" OR "Ward* Emergency" OR "Emergency Department*" OR "Room Emergency" OR "Emergency Room*" OR "Department* Emergency" OR "Patient Admission" OR "Admission*" OR "Hospitalization" OR Hospitali* OR "Hospital Transfer*" OR "Hospital Admittance" OR "Hospital Stay" OR "Patient Readmission" OR Readmission* OR "Patient Transfer" OR "Emergency Treatment" OR "Acute care" OR "Emergency care" OR "Critical care" OR "Acute service*" OR "Emergency service*" OR "Critical service*") OR AB ("Hospital Emergency Service*" OR "Emergency Hospital Service*" OR "Emergency unit*" OR "Unit* Emergency" OR "Emergency Ward*" OR "Ward* Emergency" OR "Emergency Department*" OR "Room Emergency" OR "Emergency Room*" OR "Department* Emergency" OR "Patient Admission" OR "Admission*" OR "Hospitalization" OR Hospitali* OR "Hospital Transfer*" OR "Hospital Admittance" OR "Hospital Stay" OR "Patient Readmission" OR Readmission* OR "Patient Transfer" OR "Emergency Treatment" OR "Acute care" OR "Emergency care" OR "Critical care" OR "Acute service*" OR "Emergency service*" OR "Critical service*"))</p> |             |
| #4 | #1 AND #2 AND #3 AND (Published Date: 20000101-20221231)                                                                                                                                                                                                                                                                                                                                                                                                                                                                                                                                                                                                                                                                                                                                                                                                                                                                                                                                                                                                                                                                                                                                                                                                                                                                                                              | <b>3270</b> |

| <b>EMBASE (Searched 31<sup>th</sup> December 2022)</b> |                                                                                                                                                                                                                                                                                                                                                                                                                                                                                                                                                                                                                                                                                                                                                                                                                                                                                                                                                                                                                                                                                                                                                                                                                                                                                                                                                                                                                                                                                                                                                                                                                                                                                                                                                                                                                                                |              |
|--------------------------------------------------------|------------------------------------------------------------------------------------------------------------------------------------------------------------------------------------------------------------------------------------------------------------------------------------------------------------------------------------------------------------------------------------------------------------------------------------------------------------------------------------------------------------------------------------------------------------------------------------------------------------------------------------------------------------------------------------------------------------------------------------------------------------------------------------------------------------------------------------------------------------------------------------------------------------------------------------------------------------------------------------------------------------------------------------------------------------------------------------------------------------------------------------------------------------------------------------------------------------------------------------------------------------------------------------------------------------------------------------------------------------------------------------------------------------------------------------------------------------------------------------------------------------------------------------------------------------------------------------------------------------------------------------------------------------------------------------------------------------------------------------------------------------------------------------------------------------------------------------------------|--------------|
| <b>Search</b>                                          | <b>Query</b>                                                                                                                                                                                                                                                                                                                                                                                                                                                                                                                                                                                                                                                                                                                                                                                                                                                                                                                                                                                                                                                                                                                                                                                                                                                                                                                                                                                                                                                                                                                                                                                                                                                                                                                                                                                                                                   | <b>Items</b> |
| #1                                                     | <p>('nursing home'/exp OR 'extended care facility':ti,ab,kw OR 'intermediate care facilities':ti,ab,kw OR 'long term care facility':ti,ab,kw OR 'nursing home':ti,ab,kw OR 'nursing homes':ti,ab,kw OR 'skilled nursing facilities':ti,ab,kw OR 'skilled nursing facility':ti,ab,kw OR 'nursing home patient'/mj OR 'long term care patient':ti,ab,kw OR 'nursing home patient':ti,ab,kw OR 'nursing home resident':ti,ab,kw OR 'residential home'/mj OR 'institution, residential':ti,ab,kw OR 'residential facilities':ti,ab,kw OR 'residential home':ti,ab,kw OR 'residential institution':ti,ab,kw OR 'home for the aged'/mj OR 'continuing care retirement center':ti,ab,kw OR 'geriatric homes':ti,ab,kw OR 'home for the aged':ti,ab,kw OR 'home for the elderly':ti,ab,kw OR 'homes for the aged':ti,ab,kw OR 'housing for the elderly':ti,ab,kw OR 'old age home':ti,ab,kw OR 'old age homes':ti,ab,kw OR 'old people home':ti,ab,kw OR 'old people`s home':ti,ab,kw OR 'retirement center':ti,ab,kw OR 'retirement centre':ti,ab,kw OR 'retirement home':ti,ab,kw OR 'senior residence facility':ti,ab,kw OR 'long term care'/mj OR 'chronic treatment':ti,ab,kw OR 'long term care':ti,ab,kw OR 'long term medical care':ti,ab,kw OR 'long-term care':ti,ab,kw OR 'treatment, long term':ti,ab,kw OR 'assisted living facility'/mj OR 'assisted living':ti,ab,kw OR 'assisted living facilities':ti,ab,kw OR 'assisted living facility':ti,ab,kw OR 'institutional care'/mj OR 'care, institutional':ti,ab,kw OR 'institutional care':ti,ab,kw OR 'institutional practice':ti,ab,kw OR 'institutional therapy':ti,ab,kw OR 'institutional treatment':ti,ab,kw OR 'continuing care':ti,ab OR 'extended care':ti,ab,kw OR 'restorative care':ti,ab,kw OR 'skilled care':ti,ab,kw OR 'medical home'/mj OR 'institutional care'/mj)</p> | 152,919      |
| #2                                                     | <p>('quality improvement':ti,ab,kw OR 'quality improvements':ti,ab,kw OR 'total quality management'/exp OR 'quality management':ti,ab,kw OR 'total quality management':ti,ab,kw OR 'management, total quality':ti,ab,kw OR 'quality improvement study'/exp OR 'organisational innovation':ti,ab,kw OR 'organizational innovation':ti,ab,kw OR 'quality control'/mj OR 'quality assessment':ti,ab,kw OR 'quality assurance':ti,ab,kw OR 'quality control':ti,ab,kw OR 'clinical governance':ti,ab,kw OR 'health care evaluation':ti,ab,kw OR 'health care quality assurance':ti,ab,kw OR 'healthcare evaluation':ti,ab,kw OR 'healthcare process assessment':ti,ab,kw OR 'healthcare quality assurance':ti,ab,kw OR 'quality assurance, health care':ti,ab,kw OR 'management quality circles':ti,ab,kw OR 'tqm':ti,ab OR 'plan do study act cycle'/exp OR 'pdca':ti,ab OR 'plan do check act':ti,ab OR 'six sigma methodology'/exp OR 'six sigma':ti,ab,kw OR 'six sigma methodology':ti,ab,kw OR 'lean methodology'/exp OR 'lean initiative':ti,ab,kw OR 'lean management':ti,ab,kw OR 'lean methodology':ti,ab,kw OR 'lean philosophy':ti,ab,kw OR 'lean quality improvement':ti,ab,kw OR 'lean quality initiative':ti,ab,kw OR 'lean thinking':ti,ab,kw OR 'dmaic':ti,ab OR 'dmadv':ti,ab OR 'pdca':ti,ab OR 'continuous quality improvement'/exp OR 'cqi':ti,ab OR 'focus analyze develop execute':ti,ab OR 'ciq':ti,ab</p>                                                                                                                                                                                                                                                                                                                                                                                                                 | 1,278,108    |

|    |                                                                                                                                                                                                                                                                                                                                                                                                                                                                                                                                                                                                                                                                                                                                                                                                                                                                                                                                                                                                                                                                                                                                                                                                                                                                                                               |           |
|----|---------------------------------------------------------------------------------------------------------------------------------------------------------------------------------------------------------------------------------------------------------------------------------------------------------------------------------------------------------------------------------------------------------------------------------------------------------------------------------------------------------------------------------------------------------------------------------------------------------------------------------------------------------------------------------------------------------------------------------------------------------------------------------------------------------------------------------------------------------------------------------------------------------------------------------------------------------------------------------------------------------------------------------------------------------------------------------------------------------------------------------------------------------------------------------------------------------------------------------------------------------------------------------------------------------------|-----------|
|    | OR 'collaborative quality improvement*':ti,ab OR 'performance improvement'/exp OR 'collaborative improvement':ti,ab OR 'outcome assessment'/mj OR 'health care outcome assessment':ti,ab,kw OR 'healthcare outcome assessment':ti,ab,kw OR 'outcome assessment':ti,ab,kw OR 'outcome assessment (health care)':ti,ab,kw OR 'outcome assessment, health care':ti,ab,kw OR 'outcome measurement':ti,ab,kw OR 'implementation science'/exp OR 'implementation'/mj OR 'adoption'/mj OR 'education'/mj OR 'education':ti,ab,kw OR 'self-evaluation programmes':ti,ab,kw OR 'self-evaluation programs':ti,ab,kw OR 'training support':ti,ab,kw OR 'local consensus process':ti,ab,kw OR 'professional development'/mj OR 'professional development':ti,ab,kw OR 'feedback system'/mj OR 'change management'/mj OR 'root cause analysis'/mj OR 'leadership'/mj OR 'leader':ti,ab,kw OR 'leadership':ti,ab,kw)                                                                                                                                                                                                                                                                                                                                                                                                        |           |
| #3 | ('hospital readmission'/exp OR 'hospital readmission':ti,ab,kw OR 'patient readmission':ti,ab,kw OR 'readmission':ti,ab,kw OR 'readmission rate':ti,ab,kw OR 'readmissions':ti,ab,kw OR 'rehospitalization':ti,ab,kw OR 'hospital admission'/exp OR 'admission, hospital':ti,ab,kw OR 'hospital admission':ti,ab,kw OR 'hospital admittance':ti,ab,kw OR 'hospital admitting department':ti,ab,kw OR 'hospital admitting service':ti,ab,kw OR 'hospital admitting unit':ti,ab,kw OR 'patient admission':ti,ab,kw OR 'hospitalization'/exp OR 'hospital stay':ti,ab,kw OR 'hospitalization':ti,ab,kw OR 'short stay hospitalization':ti,ab,kw OR 'emergency health service'/mj OR 'emergency health service'/exp/mj OR 'emergency medical service':ti,ab,kw OR 'emergency medical services':ti,ab,kw OR 'emergency service':ti,ab,kw OR 'patient transport'/mj OR 'patient transfer':ti,ab,kw OR 'patient transport':ti,ab,kw OR 'transport, patient':ti,ab,kw OR 'transportation of patients':ti,ab,kw OR 'Emergency Department*':ti,ab,kw OR 'Emergency Room*':ti,ab,kw OR 'Emergency ward*':ti,ab,kw OR 'emergency care'/mj OR 'acute care':ti,ab,kw OR 'acute medical care':ti,ab,kw OR 'emergency care':ti,ab,kw OR 'transitional care'/mj OR 'transition care':ti,ab,kw OR 'transitional care':ti,ab,kw) | 1,184,917 |
| #4 | #1 AND #2 AND #3 AND [2000-2022]/py                                                                                                                                                                                                                                                                                                                                                                                                                                                                                                                                                                                                                                                                                                                                                                                                                                                                                                                                                                                                                                                                                                                                                                                                                                                                           | 2,326     |

| <b>The Cochrane Library (Trials database) (Searched 31<sup>th</sup> December 2022)</b> |                                                                                                                                                                                                                                                                                                                                                                                                                                                                                                                                                                                                                                                                                                                                                                                                                                                                                                                                                                           |              |
|----------------------------------------------------------------------------------------|---------------------------------------------------------------------------------------------------------------------------------------------------------------------------------------------------------------------------------------------------------------------------------------------------------------------------------------------------------------------------------------------------------------------------------------------------------------------------------------------------------------------------------------------------------------------------------------------------------------------------------------------------------------------------------------------------------------------------------------------------------------------------------------------------------------------------------------------------------------------------------------------------------------------------------------------------------------------------|--------------|
| <b>Search</b>                                                                          | <b>Query</b>                                                                                                                                                                                                                                                                                                                                                                                                                                                                                                                                                                                                                                                                                                                                                                                                                                                                                                                                                              | <b>Items</b> |
| #1                                                                                     | ("Nursing home*" OR "Geriatric home*" OR "Care home*" OR "care facilit*" OR "skilled nursing facilit*" OR "residential facilit*" OR "homes for aged" OR "long-term care*" OR "long term care*" OR "residential home*" OR "assisted living facilit*" OR "institutional care" OR "retirement home*" OR "retirement centre" OR "retirement center" OR "old people home" OR "old people homes" OR "continuing care" OR "Medical home" OR "Medical homes" OR "Medical care" OR "senior residence facilit*") in Title Abstract Keyword                                                                                                                                                                                                                                                                                                                                                                                                                                          | 25,298       |
| #2                                                                                     | ("Quality improvement*" OR "Improvement quality" OR "Health care quality assurance" OR "Health-care quality assurance" OR "Quality assurance" OR "Organizational innovation" OR "Outcome assessment" OR "Process assessment" OR "program evaluation" OR "Program effectiveness" OR "Quality management" OR "Management, total quality" OR "Clinical Governance" OR "Outcome measure" OR "Health Care Process Assessment" OR "Healthcare Process Assessment" OR TQM OR "Plan Do Study Act" OR PDSA OR "Plan Do Check Act" OR PDCA OR "Six Sigma" OR Lean OR DMAIC OR DMADV OR "Continuous Quality Improvement" OR CQI OR "Focus Analyse Develop Execute" OR FADE OR "Collaborative Quality Improvement" OR "Quality Improvement Collaborative" OR Implement* OR Adopt* OR "Change management" OR "Workforce development" OR "professional development" OR feedback OR audit OR "Root cause analysis" OR "Local consensus process" OR leadership) in Title Abstract Keyword | 251,531      |
| #3                                                                                     | ("Hospital Emergency Service*" OR "Emergency Hospital Service*" OR "Emergency unit*" OR "Unit Emergency" OR "Emergency Ward*" OR "Ward Emergency" OR "Emergency Department*" OR "Room Emergency" OR "Emergency Room*" OR "Department Emergency" OR "Patient Admission" OR Admission* OR "Hospitalization" OR Hospital* OR "Hospital Transfer*" OR                                                                                                                                                                                                                                                                                                                                                                                                                                                                                                                                                                                                                         | 235,675      |

|    |                                                                                                                                                                                                                                                                                       |       |
|----|---------------------------------------------------------------------------------------------------------------------------------------------------------------------------------------------------------------------------------------------------------------------------------------|-------|
|    | "Hospital Admittance" OR "Hospital Stay" OR "Patient Readmission" OR Readmission* OR "Patient Transfer" OR "Emergency Treatment" OR "Acute care" OR "Emergency care" OR "Critical care" OR "Acute service*" OR "Emergency service*" OR "Critical service*") in Title Abstract Keyword |       |
| #4 | #1 AND #2 AND #3 AND                                                                                                                                                                                                                                                                  | 2,790 |

| Web of science (Searched 31th December 2022) |                                                                                                                                                                                                                                                                                                                                                                                                                                                                                                                                                                                                                                                                                                                                                                                                                                                                                                                                                                                                                                                                                                                                                                                                                                                                                                                                                                                                                                                                                                                                                                                              |           |
|----------------------------------------------|----------------------------------------------------------------------------------------------------------------------------------------------------------------------------------------------------------------------------------------------------------------------------------------------------------------------------------------------------------------------------------------------------------------------------------------------------------------------------------------------------------------------------------------------------------------------------------------------------------------------------------------------------------------------------------------------------------------------------------------------------------------------------------------------------------------------------------------------------------------------------------------------------------------------------------------------------------------------------------------------------------------------------------------------------------------------------------------------------------------------------------------------------------------------------------------------------------------------------------------------------------------------------------------------------------------------------------------------------------------------------------------------------------------------------------------------------------------------------------------------------------------------------------------------------------------------------------------------|-----------|
| Search                                       | Query                                                                                                                                                                                                                                                                                                                                                                                                                                                                                                                                                                                                                                                                                                                                                                                                                                                                                                                                                                                                                                                                                                                                                                                                                                                                                                                                                                                                                                                                                                                                                                                        | Items     |
| #1                                           | TI=("Nursing home*" OR "Geriatric home*" OR "Care home*" OR "care facilit*" OR "skilled nursing facilit*" OR "residential facilit*" OR "home* for aged" OR "long-term care*" OR "long term care*" OR "residential home*" OR "assisted living facilit*" OR "institutional care" OR "retirement home*" OR "retirement centre" OR "retirement center" OR "old people home" OR "old people homes" OR "continuing care" OR "Medical home*" OR "Medical care" OR "senior residence facility*") OR AB=("Nursing home*" OR "Geriatric home*" OR "Care home*" OR "care facilit*" OR "skilled nursing facilit*" OR "residential facilit*" OR "home* for aged" OR "long-term care*" OR "long term care*" OR "residential home*" OR "assisted living facilit*" OR "institutional care" OR "retirement home*" OR "retirement centre" OR "retirement center" OR "old people home" OR "old people homes" OR "continuing care" OR "Medical home*" OR "Medical care" OR "senior residence facility*")                                                                                                                                                                                                                                                                                                                                                                                                                                                                                                                                                                                                         | 126,846   |
| #2                                           | TI=("Quality improvement*" OR "Improvement quality" OR "Health care quality assurance" OR "Health-care quality assurance" OR "Quality assurance" OR "Organizational innovation" OR "Outcome assessment" OR "Process assessment" OR "program evaluation" OR "Program effectiveness" OR "Quality management" OR "Management, total quality" OR "Clinical Governance" OR "Outcome measure" OR "Health Care Process Assessment" OR "Healthcare Process Assessment" OR TQM OR "Plan Do Study Act" OR PDSA OR "Plan Do Check Act" OR PDCA OR "Six Sigma" OR Lean OR DMAIC OR DMADV OR "Continuous Quality Improvement" OR CQI OR "Focus Analyse Develop Execute" OR FADE OR "Collaborative Quality Improvement" OR "Quality Improvement Collaborative" OR "Implementation" OR "Change management") OR AB=("Quality improvement*" OR "Improvement quality" OR "Health care quality assurance" OR "Health-care quality assurance" OR "Quality assurance" OR "Organizational innovation" OR "Outcome assessment" OR "Process assessment" OR "program evaluation" OR "Program effectiveness" OR "Quality management" OR "Management, total quality" OR "Clinical Governance" OR "Outcome measure" OR "Health Care Process Assessment" OR "Healthcare Process Assessment" OR TQM OR "Plan Do Study Act" OR PDSA OR "Plan Do Check Act" OR PDCA OR "Six Sigma" OR Lean OR DMAIC OR DMADV OR "Continuous Quality Improvement" OR CQI OR "Focus Analyse Develop Execute" OR FADE OR "Collaborative Quality Improvement" OR "Quality Improvement Collaborative" OR "Implementation" OR "Change management") | 1,394,815 |
| #3                                           | TI=("Hospital Emergency Service*" OR "Emergency Hospital Service*" OR "Emergency unit*" OR "Unit* Emergency" OR "Emergency Ward*" OR "Ward* Emergency" OR "Emergency Department*" OR "Room Emergency" OR "Emergency Room*" OR "Department* Emergency" OR "Patient Admission" OR Admission* OR "Hospitalization" OR Hospitali* OR "Hospital Transfer*" OR "Hospital Admittance" OR "Hospital Stay" OR "Patient Readmission" OR Readmission* OR "Patient Transfer" OR "Emergency Treatment" OR "Acute care" OR "Emergency care" OR "Critical care" OR "Acute service*" OR "Emergency service*" OR "Critical service*") OR AB=("Hospital Emergency Service*" OR "Emergency Hospital Service*" OR "Emergency unit*" OR "Unit* Emergency" OR "Emergency Ward*" OR "Ward* Emergency" OR "Emergency Department*" OR "Room Emergency" OR "Emergency Room*" OR "Department* Emergency" OR "Patient Admission" OR Admission* OR "Hospitalization" OR Hospitali* OR "Hospital Transfer*" OR "Hospital Admittance" OR "Hospital Stay" OR "Patient Readmission" OR Readmission* OR "Patient Transfer" OR "Emergency Treatment" OR "Acute care" OR "Emergency care" OR "Critical care" OR "Acute service*" OR "Emergency service*" OR "Critical service*")                                                                                                                                                                                                                                                                                                                                                 | 729,489   |
| #4                                           | #1 AND #2 AND #3 AND Timespan: 2000-01-01 to 2022-12-31 (Index Date)                                                                                                                                                                                                                                                                                                                                                                                                                                                                                                                                                                                                                                                                                                                                                                                                                                                                                                                                                                                                                                                                                                                                                                                                                                                                                                                                                                                                                                                                                                                         | 2007      |

1  
2  
3  
4  
5  
6  
7  
8  
9  
10  
11  
12  
13  
14  
15  
16  
17  
18  
19  
20  
21  
22  
23  
24  
25  
26  
27  
28  
29  
30  
31  
32  
33  
34  
35  
36  
37  
38  
39  
40  
41  
42  
43  
44  
45  
46  
47  
48  
49  
50  
51  
52  
53  
54  
55  
56  
57  
58  
59  
60

For peer review only

# Reporting checklist for protocol of a systematic review and meta analysis.

Based on the PRISMA-P guidelines.

## Instructions to authors

Complete this checklist by entering the page numbers from your manuscript where readers will find each of the items listed below.

Your article may not currently address all the items on the checklist. Please modify your text to include the missing information. If you are certain that an item does not apply, please write "n/a" and provide a short explanation.

Upload your completed checklist as an extra file when you submit to a journal.

In your methods section, say that you used the PRISMA-Preporting guidelines, and cite them as:

Moher D, Shamseer L, Clarke M, Ghersi D, Liberati A, Petticrew M, Shekelle P, Stewart LA. Preferred Reporting Items for Systematic Review and Meta-Analysis Protocols (PRISMA-P) 2015 statement. Syst Rev. 2015;4(1):1.

|                     |                     | Reporting Item                                                                                                                            | Page Number |
|---------------------|---------------------|-------------------------------------------------------------------------------------------------------------------------------------------|-------------|
| <b>Title</b>        |                     |                                                                                                                                           |             |
| Identification      | <a href="#">#1a</a> | Identify the report as a protocol of a systematic review                                                                                  | 1; 6        |
| Update              | <a href="#">#1b</a> | If the protocol is for an update of a previous systematic review, identify as such                                                        | na          |
| <b>Registration</b> |                     |                                                                                                                                           |             |
|                     | <a href="#">#2</a>  | If registered, provide the name of the registry (such as PROSPERO) and registration number                                                | 6           |
| <b>Authors</b>      |                     |                                                                                                                                           |             |
| Contact             | <a href="#">#3a</a> | Provide name, institutional affiliation, e-mail address of all protocol authors; provide physical mailing address of corresponding author | 1           |
| Contribution        | <a href="#">#3b</a> | Describe contributions of protocol authors and identify the                                                                               | 17          |



guarantor of the review

## Amendments

|                    |                                                                                                                                                                                                 |    |
|--------------------|-------------------------------------------------------------------------------------------------------------------------------------------------------------------------------------------------|----|
| <a href="#">#4</a> | If the protocol represents an amendment of a previously completed or published protocol, identify as such and list changes; otherwise, state plan for documenting important protocol amendments | na |
|--------------------|-------------------------------------------------------------------------------------------------------------------------------------------------------------------------------------------------|----|

## Support

|                           |                     |                                                                                                      |    |
|---------------------------|---------------------|------------------------------------------------------------------------------------------------------|----|
| Sources                   | <a href="#">#5a</a> | Indicate sources of financial or other support for the review                                        | 17 |
| Sponsor                   | <a href="#">#5b</a> | Provide name for the review funder and / or sponsor                                                  | 17 |
| Role of sponsor or funder | <a href="#">#5c</a> | Describe roles of funder(s), sponsor(s), and / or institution(s), if any, in developing the protocol | 17 |

## Introduction

|            |                    |                                                                                                                                                          |     |
|------------|--------------------|----------------------------------------------------------------------------------------------------------------------------------------------------------|-----|
| Rationale  | <a href="#">#6</a> | Describe the rationale for the review in the context of what is already known                                                                            | 3-6 |
| Objectives | <a href="#">#7</a> | Provide an explicit statement of the question(s) the review will address with reference to participants, interventions, comparators, and outcomes (PICO) | 6   |

## Methods

|                                 |                      |                                                                                                                                                                                                                               |     |
|---------------------------------|----------------------|-------------------------------------------------------------------------------------------------------------------------------------------------------------------------------------------------------------------------------|-----|
| Eligibility criteria            | <a href="#">#8</a>   | Specify the study characteristics (such as PICO, study design, setting, time frame) and report characteristics (such as years considered, language, publication status) to be used as criteria for eligibility for the review | 8-9 |
| Information sources             | <a href="#">#9</a>   | Describe all intended information sources (such as electronic databases, contact with study authors, trial registers or other grey literature sources) with planned dates of coverage                                         | 6-7 |
| Search strategy                 | <a href="#">#10</a>  | Present draft of search strategy to be used for at least one electronic database, including planned limits, such that it could be repeated                                                                                    | 7-8 |
| Study records - data management | <a href="#">#11a</a> | Describe the mechanism(s) that will be used to manage records and data throughout the review                                                                                                                                  | 10  |
| Study records -                 | <a href="#">#11b</a> | State the process that will be used for selecting studies (such                                                                                                                                                               | 10  |

|    |                    |                                                                                      |       |
|----|--------------------|--------------------------------------------------------------------------------------|-------|
| 1  |                    |                                                                                      |       |
| 2  |                    |                                                                                      |       |
| 3  | selection process  | as two independent reviewers) through each phase of the                              |       |
| 4  |                    | review (that is, screening, eligibility and inclusion in meta-                       |       |
| 5  |                    | analysis)                                                                            |       |
| 6  |                    |                                                                                      |       |
| 7  |                    |                                                                                      |       |
| 8  | Study records -    | <a href="#">#11c</a> Describe planned method of extracting data from reports         | 10-11 |
| 9  | data collection    | (such as piloting forms, done independently, in duplicate),                          |       |
| 10 | process            | any processes for obtaining and confirming data from                                 |       |
| 11 |                    | investigators                                                                        |       |
| 12 |                    |                                                                                      |       |
| 13 |                    |                                                                                      |       |
| 14 | Data items         | <a href="#">#12</a> List and define all variables for which data will be sought      | 10-11 |
| 15 |                    | (such as PICO items, funding sources), any pre-planned data                          |       |
| 16 |                    | assumptions and simplifications                                                      |       |
| 17 |                    |                                                                                      |       |
| 18 |                    |                                                                                      |       |
| 19 |                    |                                                                                      |       |
| 20 | Outcomes and       | <a href="#">#13</a> List and define all outcomes for which data will be sought,      | 10-11 |
| 21 | prioritization     | including prioritization of main and additional outcomes, with                       |       |
| 22 |                    | rationale                                                                            |       |
| 23 |                    |                                                                                      |       |
| 24 |                    |                                                                                      |       |
| 25 | Risk of bias in    | <a href="#">#14</a> Describe anticipated methods for assessing risk of bias of       | 10    |
| 26 | individual studies | individual studies, including whether this will be done at the                       |       |
| 27 |                    | outcome or study level, or both; state how this information will                     |       |
| 28 |                    | be used in data synthesis                                                            |       |
| 29 |                    |                                                                                      |       |
| 30 |                    |                                                                                      |       |
| 31 |                    |                                                                                      |       |
| 32 | Data synthesis     | <a href="#">#15a</a> Describe criteria under which study data will be quantitatively | 11    |
| 33 |                    | synthesised                                                                          |       |
| 34 |                    |                                                                                      |       |
| 35 | Data synthesis     | <a href="#">#15b</a> If data are appropriate for quantitative synthesis, describe    | 11    |
| 36 |                    | planned summary measures, methods of handling data and                               |       |
| 37 |                    | methods of combining data from studies, including any                                |       |
| 38 |                    | planned exploration of consistency (such as I <sup>2</sup> , Kendall's $\tau$ )      |       |
| 39 |                    |                                                                                      |       |
| 40 |                    |                                                                                      |       |
| 41 |                    |                                                                                      |       |
| 42 | Data synthesis     | <a href="#">#15c</a> Describe any proposed additional analyses (such as              | 11    |
| 43 |                    | sensitivity or subgroup analyses, meta-regression)                                   |       |
| 44 |                    |                                                                                      |       |
| 45 |                    |                                                                                      |       |
| 46 | Data synthesis     | <a href="#">#15d</a> If quantitative synthesis is not appropriate, describe the type | na    |
| 47 |                    | of summary planned                                                                   |       |
| 48 |                    |                                                                                      |       |
| 49 |                    |                                                                                      |       |
| 50 | Meta-bias(es)      | <a href="#">#16</a> Specify any planned assessment of meta-bias(es) (such as         | 11    |
| 51 |                    | publication bias across studies, selective reporting within                          |       |
| 52 |                    | studies)                                                                             |       |
| 53 |                    |                                                                                      |       |
| 54 |                    |                                                                                      |       |
| 55 | Confidence in      | <a href="#">#17</a> Describe how the strength of the body of evidence will be        | na    |
| 56 | cumulative         | assessed (such as GRADE)                                                             |       |
| 57 | evidence           |                                                                                      |       |
| 58 |                    |                                                                                      |       |
| 59 |                    |                                                                                      |       |
| 60 |                    |                                                                                      |       |

1  
2  
3  
4  
5  
6  
7  
8  
9  
10  
11  
12  
13  
14  
15  
16  
17  
18  
19  
20  
21  
22  
23  
24  
25  
26  
27  
28  
29  
30  
31  
32  
33  
34  
35  
36  
37  
38  
39  
40  
41  
42  
43  
44  
45  
46  
47  
48  
49  
50  
51  
52  
53  
54  
55  
56  
57  
58  
59  
60

The PRISMA-P elaboration and explanation paper is distributed under the terms of the Creative Commons Attribution License CC-BY. This checklist was completed on 08. April 2023 using <https://www.goodreports.org/>, a tool made by the [EQUATOR Network](#) in collaboration with [Penelope.ai](#)

For peer review only

# BMJ Open

## Quality improvement interventions to prevent the use of hospital services among nursing home residents: protocol for a systematic review and meta-analysis

|                                 |                                                                                                                                                                                                                                                                                                                                                                                                                                                                                                                                                                                                                                                                                              |
|---------------------------------|----------------------------------------------------------------------------------------------------------------------------------------------------------------------------------------------------------------------------------------------------------------------------------------------------------------------------------------------------------------------------------------------------------------------------------------------------------------------------------------------------------------------------------------------------------------------------------------------------------------------------------------------------------------------------------------------|
| Journal:                        | <i>BMJ Open</i>                                                                                                                                                                                                                                                                                                                                                                                                                                                                                                                                                                                                                                                                              |
| Manuscript ID                   | bmjopen-2023-074684.R2                                                                                                                                                                                                                                                                                                                                                                                                                                                                                                                                                                                                                                                                       |
| Article Type:                   | Protocol                                                                                                                                                                                                                                                                                                                                                                                                                                                                                                                                                                                                                                                                                     |
| Date Submitted by the Author:   | 04-Sep-2023                                                                                                                                                                                                                                                                                                                                                                                                                                                                                                                                                                                                                                                                                  |
| Complete List of Authors:       | Basso, Ines; Università degli Studi del Piemonte Orientale Amedeo Avogadro, Department of Medicina Traslazionale<br>Gonella, Silvia; Azienda Ospedaliero Universitaria Citta della Salute e della Scienza di Torino<br>Bassi, Erika; Università degli Studi del Piemonte Orientale Amedeo Avogadro, Department of Medicina Traslazionale<br>Caristia, Silvia; Università degli Studi del Piemonte Orientale Amedeo Avogadro, Department of Medicina Traslazionale<br>Campagna, Sara; Università degli Studi di Torino, Department of Public Health and Pediatrics<br>Dal Molin, Alberto; Università degli Studi del Piemonte Orientale Amedeo Avogadro, Department of Medicina Traslazionale |
| <b>Primary Subject Heading</b>: | Geriatric medicine                                                                                                                                                                                                                                                                                                                                                                                                                                                                                                                                                                                                                                                                           |
| Secondary Subject Heading:      | Evidence based practice, Health services research, Palliative care                                                                                                                                                                                                                                                                                                                                                                                                                                                                                                                                                                                                                           |
| Keywords:                       | Aging, Hospitalization, Change management < HEALTH SERVICES ADMINISTRATION & MANAGEMENT, Nursing Care, Systematic Review                                                                                                                                                                                                                                                                                                                                                                                                                                                                                                                                                                     |
|                                 |                                                                                                                                                                                                                                                                                                                                                                                                                                                                                                                                                                                                                                                                                              |

SCHOLARONE™  
Manuscripts

1  
2  
3  
4  
5  
6  
7  
8  
9  
10  
11  
12  
13  
14  
15  
16  
17  
18  
19  
20  
21  
22  
23  
24  
25  
26  
27  
28  
29  
30  
31  
32  
33  
34  
35  
36  
37  
38  
39  
40  
41  
42  
43  
44  
45  
46  
47  
48  
49  
50  
51  
52  
53  
54  
55  
56  
57  
58  
59  
60

1 **Title:** Quality improvement interventions to prevent the use of hospital services among nursing  
2 home residents: protocol for a systematic review and meta-analysis

3  
4  
5  
6  
7  
8  
9  
10 **Authors:**

11  
12  
13 5 Ines Basso<sup>1,2\*</sup>, [ines.basso@uniupo.it](mailto:ines.basso@uniupo.it)

14  
15 6 Silvia Gonella<sup>3</sup>, [silvia.gonella@unito.it](mailto:silvia.gonella@unito.it)

16  
17 7 Erika Bassi<sup>1</sup>, [erika.bassi@uniupo.it](mailto:erika.bassi@uniupo.it)

18  
19 8 Silvia Caristia<sup>1</sup>, [silvia.caristia@med.uniupo.it](mailto:silvia.caristia@med.uniupo.it)

20  
21  
22 9 Sara Campagna<sup>4#</sup>, [sara.campagna@unito.it](mailto:sara.campagna@unito.it)

23  
24  
25 10 and

26  
27  
28 11 Alberto Dal Molin<sup>1#</sup>, [alberto.dalmolin@med.uniupo.it](mailto:alberto.dalmolin@med.uniupo.it) (<https://orcid.org/0000-0003-2263-1340>)

29  
30  
31  
32  
33 **Affiliations:**

34  
35  
36 14 <sup>1</sup> Università degli Studi del Piemonte Orientale Amedeo Avogadro, Department of Medicina  
37 Traslazionale, Novara, Piemonte, IT

38 15  
39 16 <sup>2</sup> Azienda Ospedaliera Nazionale SS Antonio e Biagio e C Arrigo, Department of Research,  
40 Training and Innovation Alessandria, Piemonte, IT

41 17  
42 18 <sup>3</sup> Azienda Ospedaliero Universitaria Città della Salute e della Scienza di Torino  
43 Torino, Piemonte, IT

44 19  
45 20 <sup>4</sup> Università degli Studi di Torino, Department of Public Health and Pediatrics  
46 Torino, Piemonte, IT

47  
48  
49  
50  
51  
52 23 **\*Corresponding author: Ines Basso, [ines.basso@uniupo.it](mailto:ines.basso@uniupo.it)**

53  
54 24 <https://orcid.org/0000-0002-9283-236X>

55  
56  
57  
58  
59 26 #Sara Campagna and Alberto Dal Molin are co-last authors- They contributed equally to this work.

## Abstract

**Introduction:** Quality improvement interventions are a promising strategy for reducing hospital services use among nursing home residents. However, evidence for their effectiveness is limited. It is unclear which characteristics of the quality improvement intervention and activities planned to facilitate implementation may promote fidelity to organizational and system changes. This systematic review and meta-analysis will assess the effectiveness of quality improvement interventions and implementation strategies aimed at reducing hospital services use among nursing home residents.

**Methods and analysis:** The Medline, CINAHL, Cochrane Library, Embase and Web of Science databases will be comprehensively searched in September 2023. The eligible studies should focus on the implementation of a quality improvement intervention defined as the systematic, continuous approach that designs, tests, and implements changes using real-time measurement to reduce hospitalizations or emergency department visits among long-stay nursing home residents. Quality improvement details and implementation strategies will be deductively categorized into effective practice and organisation of care taxonomy domains for delivery arrangements and implementation strategies. Quality and bias assessments will be completed using the Quality Improvement Minimum Quality Criteria Set and the Joanna Briggs Institute Critical Appraisal Tools.

The results will be pooled in a meta-analysis, by combining the natural logarithms of the rate ratios across the studies or by calculating the rate ratio using the generic inverse-variance method. Heterogeneity will be assessed using the  $I^2$  or  $H^2$  statistics if the number of included studies will be less than 10. Raw data will be requested from the authors, as required.

**Ethics and dissemination:** Ethical approval is not required. The results will be published in a peer-review journal and presented at (inter)national conferences.

**Prospero registration number:** CRD42022364195

1  
2  
3 51 **Keywords:** Systematic review, nursing homes, quality improvement, implementation science,  
4  
5 52 hospital admissions, emergency department visits  
6  
7  
8 53

9  
10 54 **Strengths and limitations of this study**  
11

- 12 55 • The protocol complies with the Preferred Reporting Items for Systematic Reviews and  
13  
14 56 Meta-analyses Protocol guideline.  
15  
16  
17 57 • A comprehensive search strategy has been developed to include all eligible studies meeting  
18  
19 58 the inclusion criteria.  
20  
21  
22 59 • The study screening, selection, data extraction and assessment of the risk of bias will be  
23  
24 60 completed by two independent reviewers.  
25  
26  
27 61 • The study will assess both the risk of bias and quality of quality improvement interventions.  
28  
29 62 • The search strategy will not include grey literature.  
30  
31 63

32  
33  
34 64 **Introduction**  
35

36  
37 65 By 2050, the global population aged 80 years or over is estimated to triple (1) and the demand for  
38  
39 66 Nursing Home (NH) services is expected to increase. NH residents have complex health needs and  
40  
41  
42 67 challenging medical situations (2,3) that lead to frequent hospital service use (4–6). These are costly  
43  
44 68 and entail the risk of iatrogenic harms, including delirium, infections, and loss of functional  
45  
46 69 dependency (7). Although a significant proportion of accesses to hospital services are helpful and  
47  
48  
49 70 necessary, international research suggests that up to 55% of hospitalizations in NHs can be avoided  
50  
51 71 with appropriate care (8). In fact, many conditions that result in admission or emergency department  
52  
53 72 visit could be averted through proper prevention (e.g., exacerbation of chronic diseases or functional  
54  
55 73 decline) or effective on-site management at an early stage (e.g., infection or dehydration) (9,10).  
56  
57  
58 74 Improving the NH staff' skills in early recognition and management of acute change of conditions,  
59  
60 75 and the use of standardized communication tools could prevent avoidable access to hospital services

1  
2  
3 76 (11). Similarly, promoting palliative care and advanced care planning enables healthcare  
4  
5 77 professionals to be aligned with residents' preferences and values, ensuring the provision of respectful  
6  
7  
8 78 and patient-centred care (12).  
9

10  
11 79 Quality improvement (QI) interventions may be a promising strategy for improving care for NH  
12  
13 80 residents and preventing hospital service use (13–14). QI intervention is defined as a systematic and  
14  
15 81 continuous approach that designs, tests and implements changes using real-time measurements to  
16  
17  
18 82 improve the safety, effectiveness, and experience of care (15). QI interventions are planned as a  
19  
20 83 cyclical process, starting with problem analysis to design a tailored intervention before  
21  
22 84 implementation (16). Changes are constantly measured during and after implementation to  
23  
24  
25 85 understand the impact and adopt the required adjustments (16). The iterative cycle, also known as the  
26  
27 86 plan-do-study-act (PDSA) method is the model used by several QI interventions, such as Total  
28  
29 87 Quality Management, Lean and Six Sigma (17). Quality improvements are usually designed as multi-  
30  
31 88 component interventions to tackle an improvement problem, involving all the organization providers,  
32  
33  
34 89 including front-line staff, and using recognized methods to identify all potential causes of the problem  
35  
36 90 and assess the impact of the intervention against the expected results through reliable process and  
37  
38  
39 91 outcome measures (16). Quality improvement interventions rely on several implementation strategies  
40  
41 92 to improve adaptation and stakeholder engagement, which may vary widely across projects and  
42  
43 93 include audits, feedback, staff education, tools, and site champions (13,18). However, the effects of  
44  
45 94 different implementation strategies on the success of QI interventions remain unclear.  
46  
47

48  
49 95 To better describe the heterogeneity of the healthcare interventions, including QI research, the  
50  
51 96 Cochrane Effective Practice and Organization of Care (EPOC) group developed a taxonomy for  
52  
53 97 quality interventions based on pragmatic descriptions of components rather than theoretical  
54  
55 98 constructs (19). The EPOC taxonomy, which can be used as a framework for exploring interventions,  
56  
57  
58 99 includes four domains of intervention delivery arrangements, financial arrangements, governance  
59  
60



1  
2  
3  
4  
5  
6  
7  
8  
9  
10  
11  
12  
13  
14  
15  
16  
17  
18  
19  
20  
21  
22  
23  
24  
25  
26  
27  
28  
29  
30  
31  
32  
33  
34  
35  
36  
37  
38  
39  
40  
41  
42  
43  
44  
45  
46  
47  
48  
49  
50  
51  
52  
53  
54  
55  
56  
57  
58  
59  
60

100 arrangements, and implementation strategies each of which is divided into categories and  
101 subcategories (20).

102 Previous experiences in hospital acute care setting found QI interventions beneficial in enhancing  
103 process care outcomes, such as organizational culture or teamwork, and improving patient care, by  
104 reducing the nosocomial infection rate, preventing falls, or improving surgical outcomes (21-24).  
105 Although previous studies have obtained encouraging results related to QI interventions, evidence of  
106 its effectiveness in NH remain limited (25,26) In particular, the INTERACT II intervention  
107 significantly reduced hospital admissions through a multi-component QI intervention aimed at  
108 training NH staff to identify and proactively manage major geriatric syndromes, encouraging  
109 advanced care planning, and promoting palliative care-oriented care. (27)

110 Given the high rate of hospital service use among NH residents, it is important to understand whether  
111 QI interventions can prevent avoidable transfers. Compared to the hospital setting, the long-term care  
112 context poses several challenges that could impede the smooth implementation of a QI initiative  
113 (25,28,29). The long-term care context has multiple unique barriers at the organizational level:  
114 inner/internal barriers (e.g., organizational culture, leadership or learning climate), outer/external  
115 barriers (e.g., organizational funding, law, and regulation), and barriers at the staff level (e.g.,  
116 knowledge, skills, and motivation) (30).

117 The NH environment can be particularly challenging because of workforce shortages and high  
118 turnover rates (31,32). Introducing a practice change that requires staff engagement in an under  
119 resourced organization may result in poor adherence to the intervention or an unsuccessful program  
120 because of lack of time (33). Additionally, a high staff turnover may lead to a continuous need to  
121 support training and education in evidence-based practices and QI methods (29).

122 Another important factor that may influence an organization's readiness to change is the involvement  
123 of leadership in QI interventions (34). The extent to which management sustains and reinforces

1  
2  
3  
4  
5  
6  
7  
8  
9  
10  
11  
12  
13  
14  
15  
16  
17  
18  
19  
20  
21  
22  
23  
24  
25  
26  
27  
28  
29  
30  
31  
32  
33  
34  
35  
36  
37  
38  
39  
40  
41  
42  
43  
44  
45  
46  
47  
48  
49  
50  
51  
52  
53  
54  
55  
56  
57  
58  
59  
60

124 cultural change, establishes a positive relationship with front-line staff, and invests resources in the  
125 adoption of a new model of care, are crucial features for achieving a high standard of care (29, 35).  
126 However, NH management is often characterized by a vertical hierarchal structure that can hinder an  
127 open flow of communication and prevent all stakeholders from collaborating fruitfully (36).

128 To date, no secondary studies have investigated the effectiveness of QI interventions to prevent  
129 hospital services use among NH residents by exploring the factors that contribute to their success,  
130 such as delivery arrangements and implementation strategies. Therefore, this systematic review aims  
131 to estimate the effectiveness of QI interventions and their implementation strategies in reducing  
132 hospital service use among NH residents. In addition, given that the quality of QI interventions is  
133 often debated in the literature (37), the secondary aim is to assess the quality and rigor of QI  
134 interventions by evaluating whether the solutions tested consider the fundamental domains of a QI  
135 interventions, such as organizational readiness, implementation phase, sustainability, or adherence  
136 (38). Moreover, we will describe delivery arrangements and implementation strategies of QI  
137 interventions.

### 138 **Research questions**

139 How effective are the QI interventions and implementation strategies aimed at preventing hospital  
140 service use among NH residents?

141 What is the quality and rigor of the QI interventions provided in NHs?

### 142 **Methods and analysis**

143 The protocol complies with the Preferred Reporting Items for Systematic Reviews and Meta-analyses  
144 Protocol (PRISMA-P) 2015 statement for reporting (39) (Supplementary material 1). It has been  
145 registered in PROSPERO (CRD42022364195).

### 146 **Review conceptual model**

1  
2  
3 147 The review will be developed following the implementation research conceptual model proposed by  
4  
5 148 Proctor and collaborators (40). According to the model (Figure 1), QI intervention strategies and  
6  
7  
8 149 implementation processes are separated but linked domains. In this review, QI strategies are defined  
9  
10 150 as organizational and system changes to reduce hospital services use. The implementation process  
11  
12 151 involves activities that transfer QI intervention strategies into clinical practice. Both domains impact  
13  
14 152 different but interrelated types of outcomes: implementation and resident outcomes. Implementation  
15  
16  
17 153 outcomes are used to assess the fidelity of implementation strategies. This review aims to assess the  
18  
19 154 effectiveness of QI intervention strategies on hospital service use, assuming that this effect is  
20  
21  
22 155 mediated by implementation strategies and outcomes.

23  
24  
25 156 *Please insert Figure 1*

### 28 157 **Search strategy**

29  
30  
31 158 Three steps will be used: a) a preliminary search of PubMed will be conducted to identify keywords;  
32  
33 159 b) peer-reviewed publications will be sought in the Medline, CINAHL, Cochrane Library, Embase  
34  
35  
36 160 and Web of Science databases; grey literature will be excluded; and c) the reference lists of all eligible  
37  
38 161 studies will be manually searched for additional papers.

39  
40  
41 162 The search strategy has been developed in collaboration with an expert librarian, by combining terms  
42  
43 163 according to the PICO framework. All terms were searched as controlled vocabulary and text words  
44  
45  
46 164 with title and abstract field limiters, and combined with Boolean Operators (AND, OR). The research  
47  
48 165 has been set from 2000, as no QI has been undertaken before this date (30), until December 31, 2022,  
49  
50 166 and will be re-run on September 1, 2023. No language limitations have been applied. The full search  
51  
52  
53 167 strategy is available in the Supplementary material 2.

54  
55  
56 168 Based on a recent international survey (41), an extensive list of terms referring to “nursing homes”  
57  
58 169 has been included.

59  
60

1  
2  
3 170 For the intervention concept, search terms which focus on “Quality improvement” or “Organizational  
4  
5 171 innovation” or “Quality Assurance, Health Care” or “Management Quality Circles,” or on a formal  
6  
7  
8 172 model of QI intervention have been used (Plan Do Study Act (PDSA); Six Sigma (DMAIC and  
9  
10 173 DMADV); Total Quality Management (TQM), Continuous Quality Improvement (CQI), Focus  
11  
12 174 Analyze Develop Execute (FADE)) (42). Moreover, terms concerning implementation strategies have  
13  
14  
15 175 been used, including “Implementation Science,” “Program Implementation,” or “Diffusion of  
16  
17 176 Innovation.” Indeed, when complex interventions are introduced in a real-world context with the goal  
18  
19 177 of changing health care professionals’ behaviours, the implementation phase needs to be developed  
20  
21  
22 178 and planned along with the intervention itself (43).

23  
24  
25 179 For the outcomes, search terms focusing on “Hospital admissions” or “Emergency Service,  
26  
27 180 Hospital” have been used.

### 30 181 **Eligibility criteria**

31  
32  
33 182 The review’s eligibility criteria will be identified based on the following elements of the PICO  
34  
35 183 framework:

36  
37  
38  
39 184 *Types of participants/setting:* Long-stay nursing home residents, defined as persons who have been  
40  
41 185 institutionalized for at least 30 days. Residents requiring short-term NH or rehabilitation services will  
42  
43 186 be excluded. Studies that recruited mixed populations (short and long-term residents) that did not  
44  
45 187 present stratified results, as well as those undertaken in multiple settings (i.e., NHs, acute care  
46  
47  
48 188 hospitals, home health agencies) and no opportunity to detect the impact of the QI in NH will be  
49  
50 189 excluded. NHs are defined as facilities that provide nursing care for people with functional or  
51  
52 190 cognitive disabilities and assist them with activities of daily living, with the aim of providing a safe  
53  
54  
55 191 and supportive environment (44). Studies conducted in facilities providing accommodations, without  
56  
57 192 on-site nurses will be excluded.

1  
2  
3 193 *Intervention(s)*: This review will include studies focusing on the implementation of QI interventions  
4  
5 194 aimed at reducing hospital services use among NH residents. The Academy of Medical Royal  
6  
7  
8 195 Colleges definition of QI will be used (15). Collaborative QI interventions will also be included  
9  
10 196 because of the importance of the model in healthcare setting (45).  
11  
12  
13 197 Empirical studies will be included if they 1) report measurable continuous local iterative testing of  
14  
15 198 solutions, 2) use real data to guide the change, 2) obtain practical contextual knowledge, and 3)  
16  
17  
18 199 encompass at least one implementation strategy developed by the EPOC taxonomy of interventions  
19  
20 200 targeting healthcare workers (e.g., distribution of educational materials, educational meetings,  
21  
22 201 clinical practice guidelines, overcoming challenges to improving quality, local opinion leaders, etc)  
23  
24  
25 202 (20). These studies may or may not use a formal model (PDSA, Six Sigma, Total Quality  
26  
27 203 Management, etc.) or a framework for improvement.  
28  
29  
30 204 Alternatives to QI strategies, such as research (studies that aim to produce generalizable knowledge,  
31  
32 205 testing a hypothesis, though a rigorous method), service evaluation (aims to assess current patient  
33  
34  
35 206 care) or clinical transformation (radical or deep transformation activity without the iterative test of  
36  
37 207 change will be excluded) (46).  
38  
39  
40 208 *Types of comparison(s)*: Studies must have a control group that does not receive any QI interventions  
41  
42 209 or a historical cohort to compare the changes before and after the intervention.  
43  
44  
45  
46 210 *Types of outcomes*: Primary outcome of the review will focus on hospitalizations, defined as the acute  
47  
48 211 admissions occurring for any conditions, while the secondary outcomes will include hospitalizations  
49  
50 212 at the end of life (last 60 days of life), potentially avoidable hospitalizations (as defined by the authors,  
51  
52 213 using all the existing metrics (8)), ED visits (the following terms will be considered interchangeably  
53  
54  
55 214 “ED transfers” or “ED attendances” or “ED presentations” or “Unplanned transfers”), and  
56  
57 215 readmissions.  
58  
59  
60

1  
2  
3 216 Both subjective (e.g., self-reported by NH staff) or objective measure (e.g., hospital database) of  
4  
5 217 hospital service use will be collected.  
6  
7

8 218 *Type of study designs:* Randomized Controlled Trials (RCTs), Non-Randomised Controlled Trials  
9  
10 (NRCTs), Uncontrolled Before- and- After trials (UBA) or Interrupted Time Series (ITS) designed  
11 219  
12 with at least three data points before and three after the intervention.  
13 220  
14  
15

### 16 221 **Selecting studies**

17  
18  
19 222 Two reviewers (I.B. and S.G.) independently performed the screening process to determine eligibility.  
20  
21  
22 223 Zotero will be used as the reference manager software. First, the title and abstract will be evaluated;  
23  
24 224 then, the full text of potentially eligible studies will be examined for compliance with the inclusion  
25  
26 225 criteria. Any disagreements will be resolved by a third author (AD).  
27  
28

### 29 226 **Risk-of-bias assessment**

30  
31  
32 227 Two independent reviewers will assess the risk of bias of the studies included in the review using the  
33  
34  
35 228 JBI Critical Appraisal Tools, based on the study design (47). These tools provide a set of questions,  
36  
37 229 that reviewers can answer with yes (i.e., criterion met), no (i.e., a criterion not met), unclear or not  
38  
39 230 applicable. No study will be excluded by the methodological quality assessment.  
40  
41

### 42 231 **Appraisal of the quality of QI interventions**

43  
44  
45 232 The quality of the QI interventions will be appraised for each included study using the QI Minimum  
46  
47  
48 233 Quality Criteria Set (QI-MQCS) to inform the transferability of the best evidence into clinical practice  
49  
50 234 (38). The QI-MQCS addresses the following core QI domains: organizational motivation,  
51  
52 235 intervention rationale, intervention description, organizational characteristics, implementation, study  
53  
54  
55 236 design, comparator, data source, timing, adherence/fidelity, health outcomes, organisational  
56  
57 237 readiness, penetration/reach, sustainability, spread and limitations.  
58  
59

### 60 238 **Data extraction**

1  
2  
3  
4  
5  
6  
7  
8  
9  
10  
11  
12  
13  
14  
15  
16  
17  
18  
19  
20  
21  
22  
23  
24  
25  
26  
27  
28  
29  
30  
31  
32  
33  
34  
35  
36  
37  
38  
39  
40  
41  
42  
43  
44  
45  
46  
47  
48  
49  
50  
51  
52  
53  
54  
55  
56  
57  
58  
59  
60

239 Two members (IB and SG) of the research team will independently extract the following study  
240 characteristics:

- 241 - Study details: Study design, date of publication, participants (NH organizational  
242 characteristics, ownership, size, etc), and study setting.
- 243 - QI intervention details: Characteristics and implementation strategies, data on the formal  
244 model used (if any), and information to appraise the quality of QI interventions (description  
245 of organizational problems, reasons or motivations for the intervention, intervention  
246 description, basic characteristics of the organization, etc) were extracted.
- 247 - Hospital service use: Data on hospitalizations, potentially avoidable hospitalizations, end-of-  
248 life hospitalizations, ED visits and readmissions.

### 250 **Data synthesis**

251 Data from the included studies will be combined into a meta-analysis based on the outcomes. The  
252 results will be pooled by combining the natural logarithms of the rate ratio across studies, or by  
253 calculating the rate ratio using the generic inverse-variance method. We will use a permutation  
254 random-effect model to estimate meta-analysis effect. Heterogeneity will be assessed using the  
255  $I^2$  statistics and we will consider high level of heterogeneity an  $I^2 > 75\%$ . Considering that the  
256  $I^2$  statistics is biased in small meta-analysis, we will test heterogeneity with the  $H^2$  if it will be included  
257 less than 10 studies. We choose an acceptable level of  $H^2$  under 1.88 with a confidence of 95% (48).  
258 Publication bias will be visually evaluated using funnel plot if more than 10 studies will be included.  
259 We will request raw data from the authors when the reported outcomes in the included studies are not  
260 homogenous. All analyses will be performed using STATA/SE17 version.

261 A narrative synthesis will also be arranged. The characteristics of the included studies will be  
262 synthesised and compared in a table. The characteristics of the QI and implementation strategies will

1  
2  
3 263 be deductively categorized into the EPOC taxonomy's domains on delivery arrangements and  
4  
5 264 implementation strategies, using all subcategories (20). The domains of governance and financial  
6  
7  
8 265 arrangements will be excluded because they are beyond the scope of this review.  
9  
10

11 266 **Patient and public involvement:** Patients and/or the public were not involved in this research's  
12  
13  
14 267 design, conduct, reporting, or dissemination plans.  
15

### 16 268 **Ethics and dissemination**

17  
18  
19 269 Ethical approval is not required for this study as it is a review based on published studies. The findings  
20  
21  
22 270 of this systematic review and meta-analysis will support clinical and organizational decision-making  
23  
24 271 by determining which QI interventions effectively prevent the use of hospital services and identifying  
25  
26 272 which implementation strategies are most successful in fostering adherence to organizational and  
27  
28  
29 273 system changes within NH settings. The results of this study will be presented at a scientific  
30  
31 274 conference and submitted to a peer-reviewed journal for publication.  
32  
33

### 34 275 **References**

- 35  
36  
37 276 1. World Health Organization. Ageing. 2021. [https://www.who.int/health-topics/ageing#tab=tab\\_1](https://www.who.int/health-topics/ageing#tab=tab_1).  
38  
39 277 Accessed 26 Dec 2022.  
40  
41 278 2. Sverdrup K, Bergh S, Selbæk G, Benth JS, Røen IM, Husebo B, Tangen GG. Trajectories of physical  
42  
43 279 performance in nursing home residents with dementia. *Aging Clin Exp Res*. 2020 Dec;32(12):2603-2610. doi:  
44  
45 280 10.1007/s40520-020-01499-y.  
46  
47  
48 281 3. Li S, Middleton A, Ottenbacher KJ, Goodwin JS. Trajectories Over the First Year of Long-Term Care  
49  
50 282 Nursing Home Residence. *J Am Med Dir Assoc*. 2018 Apr;19(4):333-341. doi: 10.1016/j.jamda.2017.09.021.  
51  
52 283 4. Kirsebom M, Hedström M, Wadensten B, Pöder U. The frequency of and reasons for acute hospital  
53  
54 284 transfers of older nursing home residents. *Arch Gerontol Geriatr*. 2014 Jan-Feb;58(1):115-20. doi:  
55  
56 285 10.1016/j.archger.2013.08.002.  
57  
58  
59  
60



- 1  
2  
3 286 5. Simo N, Cesari M, Tchiero H, Rolland Y, de Souto Barreto P, Dartigues JF, Vellas B, Tabue-Teguo  
4  
5 287 M. Frailty Index, Hospital Admission and Number of Days Spent in Hospital in Nursing Home Residents:  
6  
7 288 Results from the Incur Study. *J Nutr Health Aging*. 2021;25(2):155-159. doi: 10.1007/s12603-020-1561-7.  
8  
9 289 6. Hoffmann F, Allers K. Age and sex differences in hospitalisation of nursing home residents: a  
10  
11 290 systematic review. *BMJ Open*. 2016 Oct 8;6(10):e011912. doi: 10.1136/bmjopen-2016-011912.  
12  
13 291 7. Dwyer R, Gabbe B, Stoelwinder JU, Lowthian J. A systematic review of outcomes following  
14  
15 292 emergency transfer to hospital for residents of aged care facilities. *Age Ageing*. 2014 Nov;43(6):759-66. doi:  
16  
17 293 10.1093/ageing/afu117.  
18  
19 294 8. Lemoyne SE, Herbots HH, De Blick D, Remmen R, Monsieurs KG, Van Bogaert P. Appropriateness  
20  
21 295 of transferring nursing home residents to emergency departments: a systematic review. *BMC Geriatr*. 2019  
22  
23 296 Jan 21;19(1):17. doi: 10.1186/s12877-019-1028-z.  
24  
25 297 9. Ouslander JG, Lamb G, Perloe M, Givens JH, Kluge L, Rutland T, Atherly A, Saliba D. Potentially  
26  
27 298 avoidable hospitalizations of nursing home residents: frequency, causes, and costs: [see editorial comments by  
28  
29 299 Drs. Jean F. Wyman and William R. Hazzard, pp 760-761]. *J Am Geriatr Soc*. 2010 Apr;58(4):627-35. doi:  
30  
31 300 10.1111/j.1532-5415.2010.02768.x.  
32  
33 301 10. Frick J, Möckel M, Muller R, Searle J, Somasundaram R, Slagman A. Suitability of current definitions  
34  
35 302 of ambulatory care sensitive conditions for research in emergency department patients: a secondary health data  
36  
37 303 analysis. *BMJ Open*. 2017 Oct 22;7(10):e016109. doi: 10.1136/bmjopen-2017-016109.  
38  
39 304 11. Trahan LM, Spiers JA, Cummings GG. Decisions to Transfer Nursing Home Residents to Emergency  
40  
41 305 Departments: A Scoping Review of Contributing Factors and Staff Perspectives. *J Am Med Dir Assoc*. 2016  
42  
43 306 Nov 1;17(11):994-1005. doi: 10.1016/j.jamda.2016.05.012. Epub 2016 Jun 24  
44  
45 307 12. Pimsen A, Kao CY, Hsu ST, Shu BC. The Effect of Advance Care Planning Intervention on Hospitalization  
46  
47 308 Among Nursing Home Residents: A Systematic Review and Meta-Analysis. *J Am Med Dir Assoc*. 2022  
48  
49 309 Sep;23(9):1448-1460.e1. doi: 10.1016/j.jamda.2022.07.017. Epub 2022 Aug 11.  
50  
51 310 13. Toles M, Colón-Emeric C, Moreton E, Frey L, Leeman J. Quality improvement studies in nursing homes:  
52  
53 311 a scoping review. *BMC Health Serv Res*. 2021 Aug 12;21(1):803. doi: 10.1186/s12913-021-06803-8  
54  
55  
56  
57  
58  
59  
60

1

2

3

4

5

6

7

8

9

10

11

12

13

14

15

16

17

18

19

20

21

22

23

24

25

26

27

28

29

30

31

32

33

34

35

36

37

38

39

40

41

42

43

44

45

46

47

48

49

50

51

52

53

54

55

56

57

58

59

60

14. Mileski M, Topinka JB, Lee K, Brooks M, McNeil C, Jackson J. An investigation of quality improvement initiatives in decreasing the rate of avoidable 30-day, skilled nursing facility-to-hospital readmissions: a systematic review. *Clin Interv Aging*. 2017 Jan 25;12:213-222. doi: 10.2147/CIA.S123362.
15. Academy of Medical Royal Collages. Quality Improvement-training for better outcomes. 2016. <https://www.aomrc.org.uk/reports-guidance/quality-improvement-training-better-outcomes/> . Accessed 02 Apr 2022.
16. The Health Foundation. Quality improvement made simple. 2021 <https://www.health.org.uk/publications/quality-improvement-made-simple>. Accessed 12 Apr 2022.
17. Taylor MJ, McNicholas C, Nicolay C, Darzi A, Bell D, Reed JE. Systematic review of the application of the plan-do-study-act method to improve quality in healthcare. *BMJ Qual Saf*. 2014 Apr;23(4):290-8. doi: 10.1136/bmjqs-2013-001862.18. Woo K, Milworm G, Dowding D. Characteristics of Quality Improvement Champions in Nursing Homes: A Systematic Review With Implications for Evidence-Based Practice. *Worldviews Evid Based Nurs*. 2017 Dec;14(6):440-446. doi: 10.1111/wvn.12262
19. Grimshaw J, McAuley LM, Bero LA, Grilli R, Oxman AD, Ramsay C, Vale L, Zwarenstein M. Systematic reviews of the effectiveness of quality improvement strategies and programmes. *Qual Saf Health Care*. 2003 Aug;12(4):298-303. doi: 10.1136/qhc.12.4.298.
20. Effective Practice and Organisation of Care (EPOC). EPOC Taxonomy-topics list Delivery Arrangements. [epoc.cochrane.org/epoc-taxonomy](http://epoc.cochrane.org/epoc-taxonomy). Accessed 02 Mar 2022.
21. Nicolay CR, Purkayastha S, Greenhalgh A, Benn J, Chaturvedi S, Phillips N, Darzi A. Systematic review of the application of quality improvement methodologies from the manufacturing industry to surgical healthcare. *Br J Surg*. 2012 Mar;99(3):324-35. doi: 10.1002/bjs.7803. Epub 2011 Nov 18
22. Buljac-Samardzic M, Doekhie KD, van Wijngaarden JDH. Interventions to improve team effectiveness within health care: a systematic review of the past decade. *Hum Resour Health*. 2020 Jan 8;18(1):2. doi: 10.1186/s12960-019-0411-3.
23. Tricco AC, Thomas SM, Veroniki AA, Hamid JS, Cogo E, Strifler L, Khan PA, Sibley KM, Robson R, MacDonald H, Riva JJ, Thavorn K, Wilson C, Holroyd-Leduc J, Kerr GD, Feldman F, Majumdar SR, Jaglal SB, Hui W, Straus SE. Quality improvement strategies to prevent falls in older adults: a systematic review and network meta-analysis. *Age Ageing*. 2019 May 1;48(3):337-346. doi: 10.1093/ageing/afy219.

- 1  
2  
3 340 24. McCleskey SG, Shek L, Grein J, Gotanda H, Anderson L, Shekelle PG, Keeler E, Morton S, Nuckols TK.  
4  
5 341 Economic evaluation of quality improvement interventions to prevent catheter-associated urinary tract  
6  
7 342 infections in the hospital setting: a systematic review. *BMJ Qual Saf.* 2022 Apr;31(4):308-321. doi:  
8  
9 343 10.1136/bmjqs-2021-013839. Epub 2021 Nov 25.  
10  
11  
12 344 25. Levy C, Au D, Ozkaynak M. Innovation and Quality Improvement: Safe or Sabotage in Nursing Homes?  
13  
14 345 *J Am Med Dir Assoc.* 2021 Aug;22(8):1670-1671. doi: 10.1016/j.jamda.2021.06.026. PMID: 34334162.  
15  
16 346 26. Alexander JA, Hearld LR. What can we learn from quality improvement research? A critical review  
17  
18 347 of research methods. *Med Care Res Rev.* 2009 Jun;66(3):235-71. doi: 10.1177/1077558708330424.  
19  
20 348 27. Ouslander JG, Lamb G, Tappen R, Herndon L, Diaz S, Roos BA, Grabowski DC, Bonner A. Interventions  
21  
22 349 to reduce hospitalizations from nursing homes: evaluation of the INTERACT II collaborative quality  
23  
24 350 improvement project. *J Am Geriatr Soc.* 2011 Apr;59(4):745-53. doi: 10.1111/j.1532-5415.2011.03333.x.  
25  
26 351 Epub 2011 Mar 15.  
27  
28 352 28. Ouslander JG, Reyes B, Yang Z, Engstrom G, Tappen R, Newman D, Huckfeldt PJ. Nursing home  
29  
30 353 performance in a trial to reduce hospitalizations: Implications for future trials. *J Am Geriatr Soc.* 2021  
31  
32 354 Aug;69(8):2316-2326. doi: 10.1111/jgs.17231.  
33  
34  
35 355 29. Rantz MJ, Zwycart-Stauffacher M, Flesner M, Hicks L, Mehr D, Russell T, Minner D. Challenges of  
36  
37 356 using quality improvement methods in nursing homes that "need improvement". *J Am Med Dir Assoc.* 2012  
38  
39 357 Oct;13(8):732-8. doi: 10.1016/j.jamda.2012.07.008.  
40  
41 358 30. Kaplan HC, Brady PW, Dritz MC, Hooper DK, Linam WM, Froehle CM, Margolis P. The influence  
42  
43 359 of context on quality improvement success in health care: a systematic review of the literature. *Milbank Q.*  
44  
45 360 2010 Dec;88(4):500-59. doi: 10.1111/j.1468-0009.2010.00611.x  
46  
47 361 31. Mills WL, Pimentel CB, Snow AL, Allen RS, Wewiorski NJ, Palmer JA, Clark V, Roland TM,  
48  
49 362 McDannold SE, Hartmann CW. Nursing Home Staff Perceptions of Barriers and Facilitators to Implementing  
50  
51 363 a Quality Improvement Intervention. *J Am Med Dir Assoc.* 2019 Jul;20(7):810-815. doi:  
52  
53 364 10.1016/j.jamda.2019.01.139.  
54  
55  
56 365 32. Palmer JA, Parker VA, Mor V, Volandes AE, Barre LR, Belanger E, Carter P, Loomer L, McCreedy  
57  
58 366 E, Mitchell SL. Barriers and facilitators to implementing a pragmatic trial to improve advance care planning  
59  
60 367 in the nursing home setting. *BMC Health Serv Res.* 2019 Jul 29;19(1):527. doi: 10.1186/s12913-019-4309-5.

1  
2  
3  
4  
5  
6  
7  
8  
9  
10  
11  
12  
13  
14  
15  
16  
17  
18  
19  
20  
21  
22  
23  
24  
25  
26  
27  
28  
29  
30  
31  
32  
33  
34  
35  
36  
37  
38  
39  
40  
41  
42  
43  
44  
45  
46  
47  
48  
49  
50  
51  
52  
53  
54  
55  
56  
57  
58  
59  
60

- 368 33. Gagnon MM, Hadjistavropoulos T, Williams J. Development and mixed-methods evaluation of a pain  
assessment video training program for long-term care staff. *Pain Res Manag.* 2013 Nov-Dec;18(6):307-12.  
doi: 10.1155/2013/659320.
- 371 34. Scoville R, Little K, Rakover J, Luther K, Mate K. *Sustaining Improvement.* IHI White Paper.  
Cambridge. 2016. <https://www.ih.org>. Accessed 15 Feb 2022.
- 373 35. Hickman SE, Miech EJ, Stump TE, Fowler NR, Unroe KT. Identifying the Implementation Conditions  
Associated With Positive Outcomes in a Successful Nursing Facility Demonstration Project. *Gerontologist.*  
2020 Nov 23;60(8):1566-1574. doi: 10.1093/geront/gnaa041
- 376 36. Wicke D, Coppin R, Payne S. Teamworking in nursing homes. *J Adv Nurs.* 2004 Jan;45(2):197-204.  
doi: 10.1046/j.1365-2648.2003.02881.x.
- 378 37. Fan E, Laupacis A, Pronovost PJ, Guyatt GH, Needham DM. How to use an article about quality  
improvement. *JAMA.* 2010 Nov 24;304(20):2279-87. doi: 10.1001/jama.2010.1692.
- 380 38. Hempel S, Shekelle PG, Liu JL, Sherwood Danz M, Foy R, Lim YW, Motala A, Rubenstein LV.  
Development of the Quality Improvement Minimum Quality Criteria Set (QI-MQCS): a tool for critical  
appraisal of quality improvement intervention publications. *BMJ Qual Saf.* 2015 Dec;24(12):796-804. doi:  
10.1136/bmjqs-2014-003151.
- 384 39. Moher D, Shamseer L, Clarke M, Ghersi D, Liberati A, Petticrew M, et al. Preferred reporting items for  
systematic review and meta-analysis protocols (PRISMA-P) 2015 statement. 2015.  
<http://www.crd.york.ac.uk/prospero>. Accessed 4 Mar 4 2022.
- 387 40. Proctor EK, Landsverk J, Aarons G, Chambers D, Glisson C, Mittman B. Implementation research in  
mental health services: an emerging science with conceptual, methodological, and training challenges. *Adm  
Policy Ment Health.* 2009 Jan;36(1):24-34. doi: 10.1007/s10488-008-0197-4.
- 390 41. Burton JK, Quinn TJ, Gordon AL, MacLulich AMJ, Reynish EL, Shenkin SD. Identifying published  
studies of care home research: an international survey of researchers. *J Nurs Home Res Sci.* 2017.  
<https://www.jnursinghomeresearch.com/all-issues.html?article=150>. Accessed 15 May 2022. McPheeters  
ML, Sunil Kripalani M, Peterson NB, Idowu RT, Jerome RN, Shannon Potter MA, et al. *Quality Improvement  
Interventions To Address Health Disparities.* 2012. [www.ahrq.gov](http://www.ahrq.gov) cite. Accessed 12 Feb 2022

- 1  
2  
3 395 43. Skivington K, Matthews L, Simpson SA, Craig P, Baird J, Blazeby JM, Boyd KA, Craig N, French  
4  
5 396 DP, McIntosh E, Petticrew M, Rycroft-Malone J, White M, Moore L. A new framework for developing and  
6  
7 397 evaluating complex interventions: update of Medical Research Council guidance. *BMJ*. 2021 Sep  
8  
9 398 30;374:n2061. doi: 10.1136/bmj.n2061.
- 11 399 44. Sanford AM, Orrell M, Tolson D, Abbatecola AM, Arai H, Bauer JM, Cruz-Jentoft AJ, Dong B, Ga  
13  
14 400 H, Goel A, Hajjar R, Holmerova I, Katz PR, Koopmans RT, Rolland Y, Visvanathan R, Woo J, Morley JE,  
15  
16 401 Vellas B. An international definition for "nursing home". *J Am Med Dir Assoc*. 2015 Mar;16(3):181-4. doi:  
17  
18 402 10.1016/j.jamda.2014.12.013.
- 20 403 45. Wells S, Tamir O, Gray J, Naidoo D, Bekhit M, Goldmann D. Are quality improvement collaboratives  
21  
22 404 effective? A systematic review. *BMJ Qual Saf*. 2018 Mar;27(3):226-240. doi: 10.1136/bmjqs-2017-006926  
23
- 24 405 46. Backhouse A, Ogunlayi F. Quality improvement into practice. *BMJ*. 2020 Mar 31;368:m865. doi:  
25  
26 406 10.1136/bmj.m865.
- 28 407 47. Tufanaru C MZAECJHL. Chapter 3: Systematic reviews of effectiveness. In: Aromataris E, Munn Z  
29  
30 408 (Editors). *JBIManual for Evidence Synthesis*. JBI. 2020. <https://synthesismanual.jbi.global> Accessed 20 Jan  
31  
32 409 2023..
- 34 410 48. Mona P, Sada Nand D, SVS D, V Sreenivas, Bhaskar T. Which is the Preferred Measure of Heterogeneity.  
36  
37 411 *Meta-Analysis and Why? A Revisit. Biostat Biometrics Open Acc J*. 2017;1(1): 555555. DOI:  
38  
39 412 10.19080/BBOAJ.2017.01.555555 020)
- 41 413  
42  
43  
44 414 **Contributors:** IB, ADM, SC, SG, EB, and SC jointly contributed to the study aims, research design  
45  
46 415 and methodology. IB, SG, SC and EB produced the first draft of the article outline with the guidance  
47  
48 416 of SC, and ADM. IB and EB designed the search strategy. All authors (IB, ADM, SC, SG, SC, EB)  
49  
50 417 contributed substantially to the manuscript and critically revised the content. All authors read and  
51  
52 418 approved the final version of the manuscript.  
53  
54  
55  
56  
57  
58  
59  
60

1  
2  
3 419 **Funding:** The study was partially funded by the Italian Ministry of University and Research program  
4  
5 420 "Dipartimenti di Eccellenza 2023-2027", AGING Project – Department of Translational Medicine,  
6  
7  
8 421 Università del Piemonte Orientale  
9

10  
11 422 **Competing interests:** None declared  
12

13  
14 423 **Patient consent for publication:** Not applicable.  
15

16  
17 424 **Acknowledgements:** The authors would like to thank Ms Maoret Roberta of the Biblioteca Virtuale  
18  
19 425 per la Salute – Piemonte - for her support in the development of the search strategy.  
20  
21

22  
23 426  
24

25  
26 427 **Figure Legend**  
27

28  
29 428 **Figure 1: Adaptation of the implementation research conceptual model.** According to the model proposed by Proctor et al. (2), QI  
30 429 intervention strategies and implementation processes are separated but linked domains. Both domains impact different but interrelated  
31  
32 430 types of outcomes, implementation and residents' outcomes.  
33

34  
35 431  
36  
37  
38  
39  
40  
41  
42  
43  
44  
45  
46  
47  
48  
49  
50  
51  
52  
53  
54  
55  
56  
57  
58  
59  
60



Figure 1

# Reporting checklist for protocol of a systematic review and meta analysis.

Based on the PRISMA-P guidelines.

## Instructions to authors

Complete this checklist by entering the page numbers from your manuscript where readers will find each of the items listed below.

Your article may not currently address all the items on the checklist. Please modify your text to include the missing information. If you are certain that an item does not apply, please write "n/a" and provide a short explanation.

Upload your completed checklist as an extra file when you submit to a journal.

In your methods section, say that you used the PRISMA-Preporting guidelines, and cite them as:

Moher D, Shamseer L, Clarke M, Ghersi D, Liberati A, Petticrew M, Shekelle P, Stewart LA. Preferred Reporting Items for Systematic Review and Meta-Analysis Protocols (PRISMA-P) 2015 statement. Syst Rev. 2015;4(1):1.

|                     |                     | Reporting Item                                                                                                                            | Page Number |
|---------------------|---------------------|-------------------------------------------------------------------------------------------------------------------------------------------|-------------|
| <b>Title</b>        |                     |                                                                                                                                           |             |
| Identification      | <a href="#">#1a</a> | Identify the report as a protocol of a systematic review                                                                                  | 1; 6        |
| Update              | <a href="#">#1b</a> | If the protocol is for an update of a previous systematic review, identify as such                                                        | na          |
| <b>Registration</b> |                     |                                                                                                                                           |             |
|                     | <a href="#">#2</a>  | If registered, provide the name of the registry (such as PROSPERO) and registration number                                                | 6           |
| <b>Authors</b>      |                     |                                                                                                                                           |             |
| Contact             | <a href="#">#3a</a> | Provide name, institutional affiliation, e-mail address of all protocol authors; provide physical mailing address of corresponding author | 1           |
| Contribution        | <a href="#">#3b</a> | Describe contributions of protocol authors and identify the                                                                               | 17          |



guarantor of the review

## Amendments

|                    |                                                                                                                                                                                                 |    |
|--------------------|-------------------------------------------------------------------------------------------------------------------------------------------------------------------------------------------------|----|
| <a href="#">#4</a> | If the protocol represents an amendment of a previously completed or published protocol, identify as such and list changes; otherwise, state plan for documenting important protocol amendments | na |
|--------------------|-------------------------------------------------------------------------------------------------------------------------------------------------------------------------------------------------|----|

## Support

|                           |                     |                                                                                                      |    |
|---------------------------|---------------------|------------------------------------------------------------------------------------------------------|----|
| Sources                   | <a href="#">#5a</a> | Indicate sources of financial or other support for the review                                        | 17 |
| Sponsor                   | <a href="#">#5b</a> | Provide name for the review funder and / or sponsor                                                  | 17 |
| Role of sponsor or funder | <a href="#">#5c</a> | Describe roles of funder(s), sponsor(s), and / or institution(s), if any, in developing the protocol | 17 |

## Introduction

|            |                    |                                                                                                                                                          |     |
|------------|--------------------|----------------------------------------------------------------------------------------------------------------------------------------------------------|-----|
| Rationale  | <a href="#">#6</a> | Describe the rationale for the review in the context of what is already known                                                                            | 3-6 |
| Objectives | <a href="#">#7</a> | Provide an explicit statement of the question(s) the review will address with reference to participants, interventions, comparators, and outcomes (PICO) | 6   |

## Methods

|                                 |                      |                                                                                                                                                                                                                               |     |
|---------------------------------|----------------------|-------------------------------------------------------------------------------------------------------------------------------------------------------------------------------------------------------------------------------|-----|
| Eligibility criteria            | <a href="#">#8</a>   | Specify the study characteristics (such as PICO, study design, setting, time frame) and report characteristics (such as years considered, language, publication status) to be used as criteria for eligibility for the review | 8-9 |
| Information sources             | <a href="#">#9</a>   | Describe all intended information sources (such as electronic databases, contact with study authors, trial registers or other grey literature sources) with planned dates of coverage                                         | 6-7 |
| Search strategy                 | <a href="#">#10</a>  | Present draft of search strategy to be used for at least one electronic database, including planned limits, such that it could be repeated                                                                                    | 7-8 |
| Study records - data management | <a href="#">#11a</a> | Describe the mechanism(s) that will be used to manage records and data throughout the review                                                                                                                                  | 10  |
| Study records -                 | <a href="#">#11b</a> | State the process that will be used for selecting studies (such                                                                                                                                                               | 10  |

|    |                    |                                                                                      |       |
|----|--------------------|--------------------------------------------------------------------------------------|-------|
| 1  |                    |                                                                                      |       |
| 2  |                    |                                                                                      |       |
| 3  | selection process  | as two independent reviewers) through each phase of the                              |       |
| 4  |                    | review (that is, screening, eligibility and inclusion in meta-                       |       |
| 5  |                    | analysis)                                                                            |       |
| 6  |                    |                                                                                      |       |
| 7  |                    |                                                                                      |       |
| 8  | Study records -    | <a href="#">#11c</a> Describe planned method of extracting data from reports         | 10-11 |
| 9  | data collection    | (such as piloting forms, done independently, in duplicate),                          |       |
| 10 | process            | any processes for obtaining and confirming data from                                 |       |
| 11 |                    | investigators                                                                        |       |
| 12 |                    |                                                                                      |       |
| 13 |                    |                                                                                      |       |
| 14 | Data items         | <a href="#">#12</a> List and define all variables for which data will be sought      | 10-11 |
| 15 |                    | (such as PICO items, funding sources), any pre-planned data                          |       |
| 16 |                    | assumptions and simplifications                                                      |       |
| 17 |                    |                                                                                      |       |
| 18 |                    |                                                                                      |       |
| 19 |                    |                                                                                      |       |
| 20 | Outcomes and       | <a href="#">#13</a> List and define all outcomes for which data will be sought,      | 10-11 |
| 21 | prioritization     | including prioritization of main and additional outcomes, with                       |       |
| 22 |                    | rationale                                                                            |       |
| 23 |                    |                                                                                      |       |
| 24 |                    |                                                                                      |       |
| 25 | Risk of bias in    | <a href="#">#14</a> Describe anticipated methods for assessing risk of bias of       | 10    |
| 26 | individual studies | individual studies, including whether this will be done at the                       |       |
| 27 |                    | outcome or study level, or both; state how this information will                     |       |
| 28 |                    | be used in data synthesis                                                            |       |
| 29 |                    |                                                                                      |       |
| 30 |                    |                                                                                      |       |
| 31 |                    |                                                                                      |       |
| 32 | Data synthesis     | <a href="#">#15a</a> Describe criteria under which study data will be quantitatively | 11    |
| 33 |                    | synthesised                                                                          |       |
| 34 |                    |                                                                                      |       |
| 35 | Data synthesis     | <a href="#">#15b</a> If data are appropriate for quantitative synthesis, describe    | 11    |
| 36 |                    | planned summary measures, methods of handling data and                               |       |
| 37 |                    | methods of combining data from studies, including any                                |       |
| 38 |                    | planned exploration of consistency (such as I <sup>2</sup> , Kendall's $\tau$ )      |       |
| 39 |                    |                                                                                      |       |
| 40 |                    |                                                                                      |       |
| 41 |                    |                                                                                      |       |
| 42 | Data synthesis     | <a href="#">#15c</a> Describe any proposed additional analyses (such as              | 11    |
| 43 |                    | sensitivity or subgroup analyses, meta-regression)                                   |       |
| 44 |                    |                                                                                      |       |
| 45 |                    |                                                                                      |       |
| 46 | Data synthesis     | <a href="#">#15d</a> If quantitative synthesis is not appropriate, describe the type | na    |
| 47 |                    | of summary planned                                                                   |       |
| 48 |                    |                                                                                      |       |
| 49 |                    |                                                                                      |       |
| 50 | Meta-bias(es)      | <a href="#">#16</a> Specify any planned assessment of meta-bias(es) (such as         | 11    |
| 51 |                    | publication bias across studies, selective reporting within                          |       |
| 52 |                    | studies)                                                                             |       |
| 53 |                    |                                                                                      |       |
| 54 |                    |                                                                                      |       |
| 55 | Confidence in      | <a href="#">#17</a> Describe how the strength of the body of evidence will be        | na    |
| 56 | cumulative         | assessed (such as GRADE)                                                             |       |
| 57 | evidence           |                                                                                      |       |
| 58 |                    |                                                                                      |       |
| 59 |                    |                                                                                      |       |
| 60 |                    |                                                                                      |       |

1  
2  
3  
4  
5  
6  
7  
8  
9  
10  
11  
12  
13  
14  
15  
16  
17  
18  
19  
20  
21  
22  
23  
24  
25  
26  
27  
28  
29  
30  
31  
32  
33  
34  
35  
36  
37  
38  
39  
40  
41  
42  
43  
44  
45  
46  
47  
48  
49  
50  
51  
52  
53  
54  
55  
56  
57  
58  
59  
60

The PRISMA-P elaboration and explanation paper is distributed under the terms of the Creative Commons Attribution License CC-BY. This checklist was completed on 08. April 2023 using <https://www.goodreports.org/>, a tool made by the [EQUATOR Network](#) in collaboration with [Penelope.ai](#)

For peer review only

| PubMed (Searched 31 <sup>th</sup> December 2022) |                                                                                                                                                                                                                                                                                                                                                                                                                                                                                                                                                                                                                                                                                                                                                                                                                                                                                                                                                                                                                                                                                                                                                                                                                                                                                                                                                                                                                                                                                                                                                                                                                                                                                                                                                                                                                                                                                                                                                                                                                                                                                                                                                                                                                                                                                                                                                                                                                                                                              |           |
|--------------------------------------------------|------------------------------------------------------------------------------------------------------------------------------------------------------------------------------------------------------------------------------------------------------------------------------------------------------------------------------------------------------------------------------------------------------------------------------------------------------------------------------------------------------------------------------------------------------------------------------------------------------------------------------------------------------------------------------------------------------------------------------------------------------------------------------------------------------------------------------------------------------------------------------------------------------------------------------------------------------------------------------------------------------------------------------------------------------------------------------------------------------------------------------------------------------------------------------------------------------------------------------------------------------------------------------------------------------------------------------------------------------------------------------------------------------------------------------------------------------------------------------------------------------------------------------------------------------------------------------------------------------------------------------------------------------------------------------------------------------------------------------------------------------------------------------------------------------------------------------------------------------------------------------------------------------------------------------------------------------------------------------------------------------------------------------------------------------------------------------------------------------------------------------------------------------------------------------------------------------------------------------------------------------------------------------------------------------------------------------------------------------------------------------------------------------------------------------------------------------------------------------|-----------|
| Search                                           | Query                                                                                                                                                                                                                                                                                                                                                                                                                                                                                                                                                                                                                                                                                                                                                                                                                                                                                                                                                                                                                                                                                                                                                                                                                                                                                                                                                                                                                                                                                                                                                                                                                                                                                                                                                                                                                                                                                                                                                                                                                                                                                                                                                                                                                                                                                                                                                                                                                                                                        | Items     |
| # 1                                              | ("Nursing Homes" [Mesh] OR "Nursing home*" [Title/Abstract] OR "Homes for the Aged" [Mesh] OR "Geriatric Home*" [Title/Abstract] OR "Old age home*" [Title/Abstract] OR "Home, old age" [Title/Abstract] OR "Homes, old age" [Title/Abstract] OR "Old people home*" [Title/Abstract] OR "Old people's home*" [Title/Abstract] OR "Long-Term Care" [Mesh] OR "Long-Term Care" [Title/Abstract] OR "Long Term Care" [Title/Abstract] OR "Long term facilit*" [Title/Abstract] OR "long-term facilit*" [Title/Abstract] OR "Skilled Nursing Facilities"[Mesh] OR "Skilled Nursing Facilit*" [Title/Abstract] OR "Care home*" [Title/Abstract] OR "Residential Facilities"[Mesh] OR "Residential facilit*" [Title/Abstract] OR "Residential home*" [Title/Abstract] OR "Residential institution*" [Title/abstract] OR "Institutional care*" [Title/Abstract] OR "Care facilit*" [Title/Abstract] OR "Continuing care*" [Title/Abstract] OR "Subacute Care"[Mesh] OR "Sub-acute care" [Title/Abstract] OR "Medical home*" [Title/Abstract] OR "Medical care" [Title/Abstract] OR "Extended care facilit*" [Title/Abstract] OR "Assisted Living Facilities"[Mesh] OR "Assisted living facility*" [Title/abstract] OR "Assisted living" [Title/Abstract] OR "Skilled care" [Title/Abstract] OR "Restorative care" [Title/Abstract] OR "Retirement center" [Title/Abstract] OR "Retirement centre" [Title/Abstract] OR "Retirement home" [Title/Abstract] OR "Senior residence facilit*" [Title/Abstract])                                                                                                                                                                                                                                                                                                                                                                                                                                                                                                                                                                                                                                                                                                                                                                                                                                                                                                                                                                           | 190,129   |
| #2                                               | ("Quality Improvement"[Mesh] OR "Quality improvement" [Title/Abstract] OR "Improvement Quality" [Title/Abstract] OR "Organizational Innovation"[Mesh] OR "Organizational innovation" [Title/Abstract] OR "Organisational innovation" [Title/Abstract] OR "Quality Assurance, Health Care"[Mesh] OR "Health Care Quality Assurance" [Title/Abstract] OR "Quality assurance, health care" [Title/Abstract] OR "Program Evaluation"[Mesh] OR "Program Evaluation*" [Title/Abstract] OR "Program effectiveness" [Title/Abstract] OR "Healthcare Quality Assurance" [Title/Abstract] OR "Management Quality Circles"[Mesh] OR "Management Quality Circles" [Title/abstract] OR "Total Quality Management"[Mesh] OR "Quality Management" [Title/Abstract] OR "Management, Total Quality" [Title/Abstract] OR "Total Quality Management" [Title/Abstract] OR "Clinical Governance"[Mesh] OR "Outcome Assessment, Health Care"[Majr] OR "Healthcare outcome assessment" [Title/Abstract] OR "Health Care outcome assessment" [Title/Abstract] OR "Process Assessment, Health Care"[Majr] OR "Process assessment, health care" [Title/Abstract] OR "Outcome measure" [Title/Abstract] OR "Outcome assessment" [Title/Abstract] OR "Health Care Process Assessment" [Title/Abstract] OR "Healthcare Process Assessment" [Title/Abstract] OR TQM [Title/Abstract] OR "Plan Do Study Act" [Title/Abstract] OR PDSA [Title/Abstract] OR "Plan Do Check Act" [Title/Abstract] OR PDCA [Title/Abstract] OR "Six Sigma" [Title/Abstract] OR Lean [Title/Abstract] OR DMAIC [Title/Abstract] OR DMADV [Title/Abstract] OR "Continuous Quality Improvement" [Title/Abstract] OR CQI [Title/Abstract] OR "Focus Analyse Develop Execute" [Title/Abstract] OR FADE [Title/Abstract] OR "Collaborative Quality Improvement*" [Title/Abstract] OR "Quality Improvement Collaborative*" [Title/Abstract] OR "Performance Improvement*" [Title/Abstract] or "Collaborative Improvement" [Title/Abstract] OR "Implementation Science"[Mesh] OR "Implement*" [Title/Abstract] OR ADOPT* [Title/Abstract] OR feedback [Title/Abstract] or "professional development" [Title/Abstract] or network* [Title/Abstract] or leadership [Title/Abstract] or opinion leader* [Title/Abstract] or "consensus process*" [Title/Abstract] or "change manage*" [Title/Abstract] or train* [Title/Abstract] or audit* [Title/Abstract] OR "root cause analysis" [Title/Abstract] OR "Diffusion of Innovation"[Mesh]) | 2,915,751 |
| #3                                               | ("Emergency Service, Hospital" [Mesh] OR "Hospital Emergency Service*" [Title/Abstract] OR "Emergency Hospital Service*" [Title/Abstract] OR "Emergency unit*" [Title/Abstract] OR "Unit Emergency" [Title/Abstract] OR "Units Emergency" [Title/Abstract] OR "Emergency Ward*" [Title/Abstract] OR "Ward Emergency" [Title/Abstract] OR "Wards Emergency" [Title/Abstract] OR "Emergency Department*" [Title/Abstract] OR "Room Emergency" [Title/Abstract] OR "Emergency Room*" [Title/Abstract] OR "Emergency Outpatient Unit*" [Title/Abstract] OR "Department Emergency" [Title/Abstract] OR "Departments Emergency" [Title/Abstract] OR "Outpatient Unit Emergency" [Title/Abstract] OR "Outpatient Units Emergency" [Title/Abstract] OR "Patient Admission"                                                                                                                                                                                                                                                                                                                                                                                                                                                                                                                                                                                                                                                                                                                                                                                                                                                                                                                                                                                                                                                                                                                                                                                                                                                                                                                                                                                                                                                                                                                                                                                                                                                                                                           | 1,032,253 |

|    |                                                                                                                                                                                                                                                                                                                                                                                                                                                                                                                                                                                                                                                         |       |
|----|---------------------------------------------------------------------------------------------------------------------------------------------------------------------------------------------------------------------------------------------------------------------------------------------------------------------------------------------------------------------------------------------------------------------------------------------------------------------------------------------------------------------------------------------------------------------------------------------------------------------------------------------------------|-------|
|    | [Mesh] OR Admission* [Title/Abstract] OR "Hospitalization"[Mesh] OR Hospitali* [Title/Abstract] OR "Hospital Transfer*" [Title/Abstract] OR "Hospital Admittance" [Title/Abstract] OR "Hospital Stay" [Title/Abstract] OR "Patient Readmission" [Mesh] OR Readmission* [Title/abstract] OR "Patient Transfer"[Mesh] OR "Emergency Treatment"[Mesh] OR "Acute care" [Title/Abstract] OR "Emergency care" [Title/Abstract] OR "Critical care" [Title/Abstract] OR "Acute service*" [Title/Abstract] OR "Emergency service*" [Title/Abstract] OR "Critical service*" [Title/Abstract] OR "Transitional Care"[Mesh] OR "Transitional care" [Title/Abstract] |       |
| #4 | #1 AND #2 AND #3 AND (2000:2022[pdat])                                                                                                                                                                                                                                                                                                                                                                                                                                                                                                                                                                                                                  | 8,058 |

| CINAHL Complete (Searched 31th December 2022) |                                                                                                                                                                                                                                                                                                                                                                                                                                                                                                                                                                                                                                                                                                                                                                                                                                                                                                                                                                                                                                                                                                                                                                                                                                                                                                                                                                                                                                                                                                                                                                                                                                                                                                                                                                                                                                                                                                                                                                                                                                                                                                                                                             |         |
|-----------------------------------------------|-------------------------------------------------------------------------------------------------------------------------------------------------------------------------------------------------------------------------------------------------------------------------------------------------------------------------------------------------------------------------------------------------------------------------------------------------------------------------------------------------------------------------------------------------------------------------------------------------------------------------------------------------------------------------------------------------------------------------------------------------------------------------------------------------------------------------------------------------------------------------------------------------------------------------------------------------------------------------------------------------------------------------------------------------------------------------------------------------------------------------------------------------------------------------------------------------------------------------------------------------------------------------------------------------------------------------------------------------------------------------------------------------------------------------------------------------------------------------------------------------------------------------------------------------------------------------------------------------------------------------------------------------------------------------------------------------------------------------------------------------------------------------------------------------------------------------------------------------------------------------------------------------------------------------------------------------------------------------------------------------------------------------------------------------------------------------------------------------------------------------------------------------------------|---------|
| Search                                        | Query                                                                                                                                                                                                                                                                                                                                                                                                                                                                                                                                                                                                                                                                                                                                                                                                                                                                                                                                                                                                                                                                                                                                                                                                                                                                                                                                                                                                                                                                                                                                                                                                                                                                                                                                                                                                                                                                                                                                                                                                                                                                                                                                                       | Items   |
| #1                                            | ((MH "Nursing Home Patients") OR (MH "Home Nursing") OR (MH "Nursing Homes") OR (MH "Residential Care") OR (MH "Housing for the Elderly") OR (MH "Long Term Care") OR (MH "Skilled Nursing Facilities") OR (MH "Residential Facilities") OR TI ("Nursing home*" OR "Geriatric home*" OR "Care home*" OR "care facilit*" OR "skilled nursing facilit*" OR "residential facilit*" OR "home* for aged" OR "long-term care*" OR "long term care*" OR "residential home*" OR "assisted living facilit*" OR "institutional care" OR "retirement home*" OR "retirement centre" OR "retirement center" OR "old people home" OR "old people homes" OR "continuing care" OR "Medical home*" OR "Medical care" OR "senior residence facility*") OR AB ("Nursing home*" OR "Geriatric home*" OR "Care home*" OR "care facilit*" OR "skilled nursing facilit*" OR "residential facilit*" OR "home* for aged" OR "long-term care*" OR "long term care*" OR "residential home*" OR "assisted living facilit*" OR "institutional care" OR "retirement home*" OR "retirement centre" OR "retirement center" OR "old people home" OR "old people homes" OR "continuing care" OR "Medical home*" OR "Medical care" OR "senior residence facility*"))                                                                                                                                                                                                                                                                                                                                                                                                                                                                                                                                                                                                                                                                                                                                                                                                                                                                                                                           | 128,129 |
| #2                                            | ((MH "Quality Improvement+") OR (MH "Evaluation and Quality Improvement Program") OR (MH "Quality Management, Organizational") OR (MH "Quality Assurance") OR (MH "Quality Circles") OR (MH "Clinical Governance") OR (MH "Program Evaluation") OR (MH "Outcome Assessment") OR (MH "Process Assessment (Health Care)") OR TI ("Quality improvement*" OR "Improvement quality" OR "Health care quality assurance" OR "Health-care quality assurance" OR "Quality assurance" OR "Organizational innovation" OR "Outcome assessment" OR "Process assessment" OR "program evaluation" OR "Program effectiveness" OR "Quality management" OR "Management, total quality" OR "Clinical Governance" OR "Outcome measure" OR "Health Care Process Assessment" OR "Healthcare Process Assessment" OR TQM OR "Plan Do Study Act" OR PDSA OR "Plan Do Check Act" OR PDCA OR "Six Sigma" OR Lean OR DMAIC OR DMADV "Continuous Quality Improvement" OR CQI OR "Focus Analyse Develop Execute" OR FADE OR "Collaborative Quality Improvement" OR "Quality Improvement Collaborative") OR AB ("Quality improvement*" OR "Improvement quality" OR "Health care quality assurance" OR "Health-care quality assurance" OR "Quality assurance" OR "Organizational innovation" OR "Outcome assessment" OR "Process assessment" OR "program evaluation" OR "Program effectiveness" OR "Quality management" OR "Management, total quality" OR "Clinical Governance" OR "Outcome measure" OR "Health Care Process Assessment" OR "Healthcare Process Assessment" OR TQM OR "Plan Do Study Act" OR PDSA OR "Plan Do Check Act" OR PDCA OR "Six Sigma" OR Lean OR DMAIC OR DMADV "Continuous Quality Improvement" OR CQI OR "Focus Analyse Develop Execute" OR FADE OR "Collaborative Quality Improvement" OR "Quality Improvement Collaborative" OR (MH "Implementation Science") OR "implementation science" OR (MH "Program Implementation") OR (MH "Systems Implementation") OR (MH "Root Cause Analysis") OR "implementation" OR (MH "Organizational Development") OR (MH "Audit") OR (MH "Change Management") OR (MH "Organizational Change") OR "Local consensus process")) | 393,141 |
| #3                                            | ((MH "Emergency Service") OR (MH "Hospitalization") OR (MH "Aged, Hospitalized") OR (MH "Hospitals") OR (MH "Patient Admission") OR (MH "Observation Units") OR                                                                                                                                                                                                                                                                                                                                                                                                                                                                                                                                                                                                                                                                                                                                                                                                                                                                                                                                                                                                                                                                                                                                                                                                                                                                                                                                                                                                                                                                                                                                                                                                                                                                                                                                                                                                                                                                                                                                                                                             | 432,718 |

|    |                                                                                                                                                                                                                                                                                                                                                                                                                                                                                                                                                                                                                                                                                                                                                                                                                                                                                                                                                                                                                                                                                                                                                                                                                                                                                                                                                                |             |
|----|----------------------------------------------------------------------------------------------------------------------------------------------------------------------------------------------------------------------------------------------------------------------------------------------------------------------------------------------------------------------------------------------------------------------------------------------------------------------------------------------------------------------------------------------------------------------------------------------------------------------------------------------------------------------------------------------------------------------------------------------------------------------------------------------------------------------------------------------------------------------------------------------------------------------------------------------------------------------------------------------------------------------------------------------------------------------------------------------------------------------------------------------------------------------------------------------------------------------------------------------------------------------------------------------------------------------------------------------------------------|-------------|
|    | (MH "Readmission") OR (MH "Transfer, Discharge") OR (MH "Emergency Treatment" OR (MH "Transitional Care") OR TI ("Hospital Emergency Service*" OR "Emergency Hospital Service*" OR "Emergency unit*" OR "Unit* Emergency" OR "Emergency Ward*" OR "Ward* Emergency" OR "Emergency Department*" OR "Room Emergency" OR "Emergency Room*" OR "Department* Emergency" OR "Patient Admission" OR "Admission*" OR "Hospitalization" OR Hospitali* OR "Hospital Transfer*" OR "Hospital Admittance" OR "Hospital Stay" OR "Patient Readmission" OR Readmission* OR "Patient Transfer" OR "Emergency Treatment" OR "Acute care" OR "Emergency care" OR "Critical care" OR "Acute service*" OR "Emergency service*" OR "Critical service*") OR AB ("Hospital Emergency Service*" OR "Emergency Hospital Service*" OR "Emergency unit*" OR "Unit* Emergency" OR "Emergency Ward*" OR "Ward* Emergency" OR "Emergency Department*" OR "Room Emergency" OR "Emergency Room*" OR "Department* Emergency" OR "Patient Admission" OR "Admission*" OR "Hospitalization" OR Hospitali* OR "Hospital Transfer*" OR "Hospital Admittance" OR "Hospital Stay" OR "Patient Readmission" OR Readmission* OR "Patient Transfer" OR "Emergency Treatment" OR "Acute care" OR "Emergency care" OR "Critical care" OR "Acute service*" OR "Emergency service*" OR "Critical service*")) |             |
| #4 | #1 AND #2 AND #3 AND (Published Date: 20000101-20221231)                                                                                                                                                                                                                                                                                                                                                                                                                                                                                                                                                                                                                                                                                                                                                                                                                                                                                                                                                                                                                                                                                                                                                                                                                                                                                                       | <b>3270</b> |

| <b>EMBASE (Searched 31<sup>th</sup> December 2022)</b> |                                                                                                                                                                                                                                                                                                                                                                                                                                                                                                                                                                                                                                                                                                                                                                                                                                                                                                                                                                                                                                                                                                                                                                                                                                                                                                                                                                                                                                                                                                                                                                                                                                                                                                                                                                                                                                        |              |
|--------------------------------------------------------|----------------------------------------------------------------------------------------------------------------------------------------------------------------------------------------------------------------------------------------------------------------------------------------------------------------------------------------------------------------------------------------------------------------------------------------------------------------------------------------------------------------------------------------------------------------------------------------------------------------------------------------------------------------------------------------------------------------------------------------------------------------------------------------------------------------------------------------------------------------------------------------------------------------------------------------------------------------------------------------------------------------------------------------------------------------------------------------------------------------------------------------------------------------------------------------------------------------------------------------------------------------------------------------------------------------------------------------------------------------------------------------------------------------------------------------------------------------------------------------------------------------------------------------------------------------------------------------------------------------------------------------------------------------------------------------------------------------------------------------------------------------------------------------------------------------------------------------|--------------|
| <b>Search</b>                                          | <b>Query</b>                                                                                                                                                                                                                                                                                                                                                                                                                                                                                                                                                                                                                                                                                                                                                                                                                                                                                                                                                                                                                                                                                                                                                                                                                                                                                                                                                                                                                                                                                                                                                                                                                                                                                                                                                                                                                           | <b>Items</b> |
| #1                                                     | 'nursing home'/exp OR 'extended care facility':ti,ab,kw OR 'intermediate care facilities':ti,ab,kw OR 'long term care facility':ti,ab,kw OR 'nursing home':ti,ab,kw OR 'nursing homes':ti,ab,kw OR 'skilled nursing facilities':ti,ab,kw OR 'skilled nursing facility':ti,ab,kw OR 'nursing home patient'/mj OR 'long term care patient':ti,ab,kw OR 'nursing home patient':ti,ab,kw OR 'nursing home resident':ti,ab,kw OR 'residential home'/mj OR 'institution, residential':ti,ab,kw OR 'residential facilities':ti,ab,kw OR 'residential home':ti,ab,kw OR 'residential institution':ti,ab,kw OR 'home for the aged'/mj OR 'continuing care retirement center':ti,ab,kw OR 'geriatric homes':ti,ab,kw OR 'home for the aged':ti,ab,kw OR 'home for the elderly':ti,ab,kw OR 'homes for the aged':ti,ab,kw OR 'housing for the elderly':ti,ab,kw OR 'old age home':ti,ab,kw OR 'old age homes':ti,ab,kw OR 'old people home':ti,ab,kw OR 'old people`s home':ti,ab,kw OR 'retirement center':ti,ab,kw OR 'retirement centre':ti,ab,kw OR 'retirement home':ti,ab,kw OR 'senior residence facility':ti,ab,kw OR 'long term care'/mj OR 'chronic treatment':ti,ab,kw OR 'long term care':ti,ab,kw OR 'long term medical care':ti,ab,kw OR 'long-term care':ti,ab,kw OR 'treatment, long term':ti,ab,kw OR 'assisted living facility'/mj OR 'assisted living':ti,ab,kw OR 'assisted living facilities':ti,ab,kw OR 'assisted living facility':ti,ab,kw OR 'institutional care'/mj OR 'care, institutional':ti,ab,kw OR 'institutional care':ti,ab,kw OR 'institutional practice':ti,ab,kw OR 'institutional therapy':ti,ab,kw OR 'institutional treatment':ti,ab,kw OR 'continuing care':ti,ab OR 'extended care':ti,ab,kw OR 'restorative care':ti,ab,kw OR 'skilled care':ti,ab,kw OR 'medical home'/mj OR 'institutional care'/mj) | 152,919      |
| #2                                                     | '(quality improvement':ti,ab,kw OR 'quality improvements':ti,ab,kw OR 'total quality management'/exp OR 'quality management':ti,ab,kw OR 'total quality management':ti,ab,kw OR 'management, total quality':ti,ab,kw OR 'quality improvement study'/exp OR 'organisational innovation':ti,ab,kw OR 'organizational innovation':ti,ab,kw OR 'quality control'/mj OR 'quality assessment':ti,ab,kw OR 'quality assurance':ti,ab,kw OR 'quality control':ti,ab,kw OR 'clinical governance':ti,ab,kw OR 'health care evaluation':ti,ab,kw OR 'health care quality assurance':ti,ab,kw OR 'healthcare evaluation':ti,ab,kw OR 'healthcare process assessment':ti,ab,kw OR 'healthcare quality assurance':ti,ab,kw OR 'quality assurance, health care':ti,ab,kw OR 'management quality circles':ti,ab,kw OR 'tqm:ti,ab OR 'plan do study act cycle'/exp OR 'pdsa:ti,ab OR 'plan do check act':ti,ab OR 'six sigma methodology'/exp OR 'six sigma':ti,ab,kw OR 'six sigma methodology':ti,ab,kw OR 'lean methodology'/exp OR 'lean initiative':ti,ab,kw OR 'lean management':ti,ab,kw OR 'lean methodology':ti,ab,kw OR 'lean philosophy':ti,ab,kw OR 'lean quality improvement':ti,ab,kw OR 'lean quality initiative':ti,ab,kw OR 'lean thinking':ti,ab,kw OR 'dmaic:ti,ab OR 'dmadv:ti,ab OR 'pdca:ti,ab OR 'continuous quality improvement'/exp OR 'cqi:ti,ab OR 'focus analyze develop execute':ti,ab OR 'ciq:ti,ab                                                                                                                                                                                                                                                                                                                                                                                                                       | 1,278,108    |

|    |                                                                                                                                                                                                                                                                                                                                                                                                                                                                                                                                                                                                                                                                                                                                                                                                                                                                                                                                                                                                                                                                                                                                                                                                                                                                                                               |           |
|----|---------------------------------------------------------------------------------------------------------------------------------------------------------------------------------------------------------------------------------------------------------------------------------------------------------------------------------------------------------------------------------------------------------------------------------------------------------------------------------------------------------------------------------------------------------------------------------------------------------------------------------------------------------------------------------------------------------------------------------------------------------------------------------------------------------------------------------------------------------------------------------------------------------------------------------------------------------------------------------------------------------------------------------------------------------------------------------------------------------------------------------------------------------------------------------------------------------------------------------------------------------------------------------------------------------------|-----------|
|    | OR 'collaborative quality improvement*':ti,ab OR 'performance improvement'/exp OR 'collaborative improvement':ti,ab OR 'outcome assessment'/mj OR 'health care outcome assessment':ti,ab,kw OR 'healthcare outcome assessment':ti,ab,kw OR 'outcome assessment':ti,ab,kw OR 'outcome assessment (health care)':ti,ab,kw OR 'outcome assessment, health care':ti,ab,kw OR 'outcome measurement':ti,ab,kw OR 'implementation science'/exp OR 'implementation'/mj OR 'adoption'/mj OR 'education'/mj OR 'education':ti,ab,kw OR 'self-evaluation programmes':ti,ab,kw OR 'self-evaluation programs':ti,ab,kw OR 'training support':ti,ab,kw OR 'local consensus process':ti,ab,kw OR 'professional development'/mj OR 'professional development':ti,ab,kw OR 'feedback system'/mj OR 'change management'/mj OR 'root cause analysis'/mj OR 'leadership'/mj OR 'leader':ti,ab,kw OR 'leadership':ti,ab,kw)                                                                                                                                                                                                                                                                                                                                                                                                        |           |
| #3 | ('hospital readmission'/exp OR 'hospital readmission':ti,ab,kw OR 'patient readmission':ti,ab,kw OR 'readmission':ti,ab,kw OR 'readmission rate':ti,ab,kw OR 'readmissions':ti,ab,kw OR 'rehospitalization':ti,ab,kw OR 'hospital admission'/exp OR 'admission, hospital':ti,ab,kw OR 'hospital admission':ti,ab,kw OR 'hospital admittance':ti,ab,kw OR 'hospital admitting department':ti,ab,kw OR 'hospital admitting service':ti,ab,kw OR 'hospital admitting unit':ti,ab,kw OR 'patient admission':ti,ab,kw OR 'hospitalization'/exp OR 'hospital stay':ti,ab,kw OR 'hospitalization':ti,ab,kw OR 'short stay hospitalization':ti,ab,kw OR 'emergency health service'/mj OR 'emergency health service'/exp/mj OR 'emergency medical service':ti,ab,kw OR 'emergency medical services':ti,ab,kw OR 'emergency service':ti,ab,kw OR 'patient transport'/mj OR 'patient transfer':ti,ab,kw OR 'patient transport':ti,ab,kw OR 'transport, patient':ti,ab,kw OR 'transportation of patients':ti,ab,kw OR 'Emergency Department*':ti,ab,kw OR 'Emergency Room*':ti,ab,kw OR 'Emergency ward*':ti,ab,kw OR 'emergency care'/mj OR 'acute care':ti,ab,kw OR 'acute medical care':ti,ab,kw OR 'emergency care':ti,ab,kw OR 'transitional care'/mj OR 'transition care':ti,ab,kw OR 'transitional care':ti,ab,kw) | 1,184,917 |
| #4 | #1 AND #2 AND #3 AND [2000-2022]/py                                                                                                                                                                                                                                                                                                                                                                                                                                                                                                                                                                                                                                                                                                                                                                                                                                                                                                                                                                                                                                                                                                                                                                                                                                                                           | 2,326     |

| <b>The Cochrane Library (Trials database) (Searched 31<sup>th</sup> December 2022)</b> |                                                                                                                                                                                                                                                                                                                                                                                                                                                                                                                                                                                                                                                                                                                                                                                                                                                                                                                                                                           |              |
|----------------------------------------------------------------------------------------|---------------------------------------------------------------------------------------------------------------------------------------------------------------------------------------------------------------------------------------------------------------------------------------------------------------------------------------------------------------------------------------------------------------------------------------------------------------------------------------------------------------------------------------------------------------------------------------------------------------------------------------------------------------------------------------------------------------------------------------------------------------------------------------------------------------------------------------------------------------------------------------------------------------------------------------------------------------------------|--------------|
| <b>Search</b>                                                                          | <b>Query</b>                                                                                                                                                                                                                                                                                                                                                                                                                                                                                                                                                                                                                                                                                                                                                                                                                                                                                                                                                              | <b>Items</b> |
| #1                                                                                     | ("Nursing home*" OR "Geriatric home*" OR "Care home*" OR "care facilit*" OR "skilled nursing facilit*" OR "residential facilit*" OR "homes for aged" OR "long-term care*" OR "long term care*" OR "residential home*" OR "assisted living facilit*" OR "institutional care" OR "retirement home*" OR "retirement centre" OR "retirement center" OR "old people home" OR "old people homes" OR "continuing care" OR "Medical home" OR "Medical homes" OR "Medical care" OR "senior residence facilit*") in Title Abstract Keyword                                                                                                                                                                                                                                                                                                                                                                                                                                          | 25,298       |
| #2                                                                                     | ("Quality improvement*" OR "Improvement quality" OR "Health care quality assurance" OR "Health-care quality assurance" OR "Quality assurance" OR "Organizational innovation" OR "Outcome assessment" OR "Process assessment" OR "program evaluation" OR "Program effectiveness" OR "Quality management" OR "Management, total quality" OR "Clinical Governance" OR "Outcome measure" OR "Health Care Process Assessment" OR "Healthcare Process Assessment" OR TQM OR "Plan Do Study Act" OR PDSA OR "Plan Do Check Act" OR PDCA OR "Six Sigma" OR Lean OR DMAIC OR DMADV OR "Continuous Quality Improvement" OR CQI OR "Focus Analyse Develop Execute" OR FADE OR "Collaborative Quality Improvement" OR "Quality Improvement Collaborative" OR Implement* OR Adopt* OR "Change management" OR "Workforce development" OR "professional development" OR feedback OR audit OR "Root cause analysis" OR "Local consensus process" OR leadership) in Title Abstract Keyword | 251,531      |
| #3                                                                                     | ("Hospital Emergency Service*" OR "Emergency Hospital Service*" OR "Emergency unit*" OR "Unit Emergency" OR "Emergency Ward*" OR "Ward Emergency" OR "Emergency Department*" OR "Room Emergency" OR "Emergency Room*" OR "Department Emergency" OR "Patient Admission" OR Admission* OR "Hospitalization" OR Hospital* OR "Hospital Transfer*" OR                                                                                                                                                                                                                                                                                                                                                                                                                                                                                                                                                                                                                         | 235,675      |

|    |                                                                                                                                                                                                                                                                                       |       |
|----|---------------------------------------------------------------------------------------------------------------------------------------------------------------------------------------------------------------------------------------------------------------------------------------|-------|
|    | "Hospital Admittance" OR "Hospital Stay" OR "Patient Readmission" OR Readmission* OR "Patient Transfer" OR "Emergency Treatment" OR "Acute care" OR "Emergency care" OR "Critical care" OR "Acute service*" OR "Emergency service*" OR "Critical service*") in Title Abstract Keyword |       |
| #4 | #1 AND #2 AND #3 AND                                                                                                                                                                                                                                                                  | 2,790 |

| Web of science (Searched 31th December 2022) |                                                                                                                                                                                                                                                                                                                                                                                                                                                                                                                                                                                                                                                                                                                                                                                                                                                                                                                                                                                                                                                                                                                                                                                                                                                                                                                                                                                                                                                                                                                                                                                              |           |
|----------------------------------------------|----------------------------------------------------------------------------------------------------------------------------------------------------------------------------------------------------------------------------------------------------------------------------------------------------------------------------------------------------------------------------------------------------------------------------------------------------------------------------------------------------------------------------------------------------------------------------------------------------------------------------------------------------------------------------------------------------------------------------------------------------------------------------------------------------------------------------------------------------------------------------------------------------------------------------------------------------------------------------------------------------------------------------------------------------------------------------------------------------------------------------------------------------------------------------------------------------------------------------------------------------------------------------------------------------------------------------------------------------------------------------------------------------------------------------------------------------------------------------------------------------------------------------------------------------------------------------------------------|-----------|
| Search                                       | Query                                                                                                                                                                                                                                                                                                                                                                                                                                                                                                                                                                                                                                                                                                                                                                                                                                                                                                                                                                                                                                                                                                                                                                                                                                                                                                                                                                                                                                                                                                                                                                                        | Items     |
| #1                                           | TI=("Nursing home*" OR "Geriatric home*" OR "Care home*" OR "care facilit*" OR "skilled nursing facilit*" OR "residential facilit*" OR "home* for aged" OR "long-term care*" OR "long term care*" OR "residential home*" OR "assisted living facilit*" OR "institutional care" OR "retirement home*" OR "retirement centre" OR "retirement center" OR "old people home" OR "old people homes" OR "continuing care" OR "Medical home*" OR "Medical care" OR "senior residence facility*") OR AB=("Nursing home*" OR "Geriatric home*" OR "Care home*" OR "care facilit*" OR "skilled nursing facilit*" OR "residential facilit*" OR "home* for aged" OR "long-term care*" OR "long term care*" OR "residential home*" OR "assisted living facilit*" OR "institutional care" OR "retirement home*" OR "retirement centre" OR "retirement center" OR "old people home" OR "old people homes" OR "continuing care" OR "Medical home*" OR "Medical care" OR "senior residence facility*")                                                                                                                                                                                                                                                                                                                                                                                                                                                                                                                                                                                                         | 126,846   |
| #2                                           | TI=("Quality improvement*" OR "Improvement quality" OR "Health care quality assurance" OR "Health-care quality assurance" OR "Quality assurance" OR "Organizational innovation" OR "Outcome assessment" OR "Process assessment" OR "program evaluation" OR "Program effectiveness" OR "Quality management" OR "Management, total quality" OR "Clinical Governance" OR "Outcome measure" OR "Health Care Process Assessment" OR "Healthcare Process Assessment" OR TQM OR "Plan Do Study Act" OR PDSA OR "Plan Do Check Act" OR PDCA OR "Six Sigma" OR Lean OR DMAIC OR DMADV OR "Continuous Quality Improvement" OR CQI OR "Focus Analyse Develop Execute" OR FADE OR "Collaborative Quality Improvement" OR "Quality Improvement Collaborative" OR "Implementation" OR "Change management") OR AB=("Quality improvement*" OR "Improvement quality" OR "Health care quality assurance" OR "Health-care quality assurance" OR "Quality assurance" OR "Organizational innovation" OR "Outcome assessment" OR "Process assessment" OR "program evaluation" OR "Program effectiveness" OR "Quality management" OR "Management, total quality" OR "Clinical Governance" OR "Outcome measure" OR "Health Care Process Assessment" OR "Healthcare Process Assessment" OR TQM OR "Plan Do Study Act" OR PDSA OR "Plan Do Check Act" OR PDCA OR "Six Sigma" OR Lean OR DMAIC OR DMADV OR "Continuous Quality Improvement" OR CQI OR "Focus Analyse Develop Execute" OR FADE OR "Collaborative Quality Improvement" OR "Quality Improvement Collaborative" OR "Implementation" OR "Change management") | 1,394,815 |
| #3                                           | TI=("Hospital Emergency Service*" OR "Emergency Hospital Service*" OR "Emergency unit*" OR "Unit* Emergency" OR "Emergency Ward*" OR "Ward* Emergency" OR "Emergency Department*" OR "Room Emergency" OR "Emergency Room*" OR "Department* Emergency" OR "Patient Admission" OR Admission* OR "Hospitalization" OR Hospitali* OR "Hospital Transfer*" OR "Hospital Admittance" OR "Hospital Stay" OR "Patient Readmission" OR Readmission* OR "Patient Transfer" OR "Emergency Treatment" OR "Acute care" OR "Emergency care" OR "Critical care" OR "Acute service*" OR "Emergency service*" OR "Critical service*") OR AB=("Hospital Emergency Service*" OR "Emergency Hospital Service*" OR "Emergency unit*" OR "Unit* Emergency" OR "Emergency Ward*" OR "Ward* Emergency" OR "Emergency Department*" OR "Room Emergency" OR "Emergency Room*" OR "Department* Emergency" OR "Patient Admission" OR Admission* OR "Hospitalization" OR Hospitali* OR "Hospital Transfer*" OR "Hospital Admittance" OR "Hospital Stay" OR "Patient Readmission" OR Readmission* OR "Patient Transfer" OR "Emergency Treatment" OR "Acute care" OR "Emergency care" OR "Critical care" OR "Acute service*" OR "Emergency service*" OR "Critical service*")                                                                                                                                                                                                                                                                                                                                                 | 729,489   |
| #4                                           | #1 AND #2 AND #3 AND Timespan: 2000-01-01 to 2022-12-31 (Index Date)                                                                                                                                                                                                                                                                                                                                                                                                                                                                                                                                                                                                                                                                                                                                                                                                                                                                                                                                                                                                                                                                                                                                                                                                                                                                                                                                                                                                                                                                                                                         | 2007      |



1  
2  
3  
4  
5  
6  
7  
8  
9  
10  
11  
12  
13  
14  
15  
16  
17  
18  
19  
20  
21  
22  
23  
24  
25  
26  
27  
28  
29  
30  
31  
32  
33  
34  
35  
36  
37  
38  
39  
40  
41  
42  
43  
44  
45  
46  
47  
48  
49  
50  
51  
52  
53  
54  
55  
56  
57  
58  
59  
60

For peer review only
