# Supplementary material for: Quality improvement interventions to prevent the use of hospital services among nursing home residents: protocol for a systematic review and meta-analysis
Source: PubMed Central journal article supplement — BMJ Open. 2023 Sep 27;13(9):e074684. doi: 10.1136/bmjopen-2023-074684 (PMC10537830; doi:10.1136/bmjopen-2023-074684), 2023-09-27
Supplement: bmjopen-2023-074684supp002.pdf [file bmjopen-2023-074684supp002.pdf]

| PubMed (Searched 31 <sup>th</sup> December 2022) |                                                                                                                                                                                                                                                                                                                                                                                                                                                                                                                                                                                                                                                                                                                                                                                                                                                                                                                                                                                                                                                                                                                                                                                                                                                                                                                                                                                                                                                                                                                                                                                                                                                                                                                                                                                                                                                                                                                                                                                                                                                                                                                                                                                                                                                                                                                                                                                                                                                                              |           |
|--------------------------------------------------|------------------------------------------------------------------------------------------------------------------------------------------------------------------------------------------------------------------------------------------------------------------------------------------------------------------------------------------------------------------------------------------------------------------------------------------------------------------------------------------------------------------------------------------------------------------------------------------------------------------------------------------------------------------------------------------------------------------------------------------------------------------------------------------------------------------------------------------------------------------------------------------------------------------------------------------------------------------------------------------------------------------------------------------------------------------------------------------------------------------------------------------------------------------------------------------------------------------------------------------------------------------------------------------------------------------------------------------------------------------------------------------------------------------------------------------------------------------------------------------------------------------------------------------------------------------------------------------------------------------------------------------------------------------------------------------------------------------------------------------------------------------------------------------------------------------------------------------------------------------------------------------------------------------------------------------------------------------------------------------------------------------------------------------------------------------------------------------------------------------------------------------------------------------------------------------------------------------------------------------------------------------------------------------------------------------------------------------------------------------------------------------------------------------------------------------------------------------------------|-----------|
| Search                                           | Query                                                                                                                                                                                                                                                                                                                                                                                                                                                                                                                                                                                                                                                                                                                                                                                                                                                                                                                                                                                                                                                                                                                                                                                                                                                                                                                                                                                                                                                                                                                                                                                                                                                                                                                                                                                                                                                                                                                                                                                                                                                                                                                                                                                                                                                                                                                                                                                                                                                                        | Items     |
| # 1                                              | ("Nursing Homes" [Mesh] OR "Nursing home*" [Title/Abstract] OR "Homes for the Aged" [Mesh] OR "Geriatric Home*" [Title/Abstract] OR "Old age home*" [Title/Abstract] OR "Home, old age" [Title/Abstract] OR "Homes, old age" [Title/Abstract] OR "Old people home*" [Title/Abstract] OR "Old people's home*" [Title/Abstract] OR "Long-Term Care" [Mesh] OR "Long-Term Care" [Title/Abstract] OR "Long Term Care" [Title/Abstract] OR "Long term facilit*" [Title/Abstract] OR "long-term facilit*" [Title/Abstract] OR "Skilled Nursing Facilities"[Mesh] OR "Skilled Nursing Facilit*" [Title/Abstract] OR "Care home*" [Title/Abstract] OR "Residential Facilities"[Mesh] OR "Residential facilit*" [Title/Abstract] OR "Residential home*" [Title/Abstract] OR "Residential institution*" [Title/abstract] OR "Institutional care*" [Title/Abstract] OR "Care facilit*" [Title/Abstract] OR "Continuing care*" [Title/Abstract] OR "Subacute Care"[Mesh] OR "Sub-acute care" [Title/Abstract] OR "Medical home*" [Title/Abstract] OR "Medical care" [Title/Abstract] OR "Extended care facilit*" [Title/Abstract] OR "Assisted Living Facilities"[Mesh] OR "Assisted living facility*" [Title/abstract] OR "Assisted living" [Title/Abstract] OR "Skilled care" [Title/Abstract] OR "Restorative care" [Title/Abstract] OR "Retirement center" [Title/Abstract] OR "Retirement centre" [Title/Abstract] OR "Retirement home" [Title/Abstract] OR "Senior residence facilit*" [Title/Abstract])                                                                                                                                                                                                                                                                                                                                                                                                                                                                                                                                                                                                                                                                                                                                                                                                                                                                                                                                                                           | 190,129   |
| #2                                               | ("Quality Improvement"[Mesh] OR "Quality improvement" [Title/Abstract] OR "Improvement Quality" [Title/Abstract] OR "Organizational Innovation"[Mesh] OR "Organizational innovation" [Title/Abstract] OR "Organisational innovation" [Title/Abstract] OR "Quality Assurance, Health Care"[Mesh] OR "Health Care Quality Assurance" [Title/Abstract] OR "Quality assurance, health care" [Title/Abstract] OR "Program Evaluation"[Mesh] OR "Program Evaluation*" [Title/Abstract] OR "Program effectiveness" [Title/Abstract] OR "Healthcare Quality Assurance" [Title/Abstract] OR "Management Quality Circles"[Mesh] OR "Management Quality Circles" [Title/abstract] OR "Total Quality Management"[Mesh] OR "Quality Management" [Title/Abstract] OR "Management, Total Quality" [Title/Abstract] OR "Total Quality Management" [Title/Abstract] OR "Clinical Governance"[Mesh] OR "Outcome Assessment, Health Care"[Majr] OR "Healthcare outcome assessment" [Title/Abstract] OR "Health Care outcome assessment" [Title/Abstract] OR "Process Assessment, Health Care"[Majr] OR "Process assessment, health care" [Title/Abstract] OR "Outcome measure" [Title/Abstract] OR "Outcome assessment" [Title/Abstract] OR "Health Care Process Assessment" [Title/Abstract] OR "Healthcare Process Assessment" [Title/Abstract] OR TQM [Title/Abstract] OR "Plan Do Study Act" [Title/Abstract] OR PDSA [Title/Abstract] OR "Plan Do Check Act" [Title/Abstract] OR PDCA [Title/Abstract] OR "Six Sigma" [Title/Abstract] OR Lean [Title/Abstract] OR DMAIC [Title/Abstract] OR DMADV [Title/Abstract] OR "Continuous Quality Improvement" [Title/Abstract] OR CQI [Title/Abstract] OR "Focus Analyse Develop Execute" [Title/Abstract] OR FADE [Title/Abstract] OR "Collaborative Quality Improvement*" [Title/Abstract] OR "Quality Improvement Collaborative*" [Title/Abstract] OR "Performance Improvement*" [Title/Abstract] or "Collaborative Improvement" [Title/Abstract] OR "Implementation Science"[Mesh] OR "Implement*" [Title/Abstract] OR ADOPT* [Title/Abstract] OR feedback [Title/Abstract] or "professional development" [Title/Abstract] or network* [Title/Abstract] or leadership [Title/Abstract] or opinion leader* [Title/Abstract] or "consensus process*" [Title/Abstract] or "change manage*" [Title/Abstract] or train* [Title/Abstract] or audit* [Title/Abstract] OR "root cause analysis" [Title/Abstract] OR "Diffusion of Innovation"[Mesh]) | 2,915,751 |
| #3                                               | ("Emergency Service, Hospital" [Mesh] OR "Hospital Emergency Service*" [Title/Abstract] OR "Emergency Hospital Service*" [Title/Abstract] OR "Emergency unit*" [Title/Abstract] OR "Unit Emergency" [Title/Abstract] OR "Units Emergency" [Title/Abstract] OR "Emergency Ward*" [Title/Abstract] OR "Ward Emergency" [Title/Abstract] OR "Wards Emergency" [Title/Abstract] OR "Emergency Department*" [Title/Abstract] OR "Room Emergency" [Title/Abstract] OR "Emergency Room*" [Title/Abstract] OR "Emergency Outpatient Unit*" [Title/Abstract] OR "Department Emergency" [Title/Abstract] OR "Departments Emergency" [Title/Abstract] OR "Outpatient Unit Emergency" [Title/Abstract] OR "Outpatient Units Emergency" [Title/Abstract] OR "Patient Admission"                                                                                                                                                                                                                                                                                                                                                                                                                                                                                                                                                                                                                                                                                                                                                                                                                                                                                                                                                                                                                                                                                                                                                                                                                                                                                                                                                                                                                                                                                                                                                                                                                                                                                                           | 1,032,253 |

|    |                                                                                                                                                                                                                                                                                                                                                                                                                                                                                                                                                                                                                                                         |       |
|----|---------------------------------------------------------------------------------------------------------------------------------------------------------------------------------------------------------------------------------------------------------------------------------------------------------------------------------------------------------------------------------------------------------------------------------------------------------------------------------------------------------------------------------------------------------------------------------------------------------------------------------------------------------|-------|
|    | [Mesh] OR Admission* [Title/Abstract] OR "Hospitalization"[Mesh] OR Hospitali* [Title/Abstract] OR "Hospital Transfer*" [Title/Abstract] OR "Hospital Admittance" [Title/Abstract] OR "Hospital Stay" [Title/Abstract] OR "Patient Readmission" [Mesh] OR Readmission* [Title/abstract] OR "Patient Transfer"[Mesh] OR "Emergency Treatment"[Mesh] OR "Acute care" [Title/Abstract] OR "Emergency care" [Title/Abstract] OR "Critical care" [Title/Abstract] OR "Acute service*" [Title/Abstract] OR "Emergency service*" [Title/Abstract] OR "Critical service*" [Title/Abstract] OR "Transitional Care"[Mesh] OR "Transitional care" [Title/Abstract] |       |
| #4 | #1 AND #2 AND #3 AND (2000:2022[pdat])                                                                                                                                                                                                                                                                                                                                                                                                                                                                                                                                                                                                                  | 8,058 |

| CINAHL Complete (Searched 31th December 2022) |                                                                                                                                                                                                                                                                                                                                                                                                                                                                                                                                                                                                                                                                                                                                                                                                                                                                                                                                                                                                                                                                                                                                                                                                                                                                                                                                                                                                                                                                                                                                                                                                                                                                                                                                                                                                                                                                                                                                                                                                                                                                                                                                                             |         |
|-----------------------------------------------|-------------------------------------------------------------------------------------------------------------------------------------------------------------------------------------------------------------------------------------------------------------------------------------------------------------------------------------------------------------------------------------------------------------------------------------------------------------------------------------------------------------------------------------------------------------------------------------------------------------------------------------------------------------------------------------------------------------------------------------------------------------------------------------------------------------------------------------------------------------------------------------------------------------------------------------------------------------------------------------------------------------------------------------------------------------------------------------------------------------------------------------------------------------------------------------------------------------------------------------------------------------------------------------------------------------------------------------------------------------------------------------------------------------------------------------------------------------------------------------------------------------------------------------------------------------------------------------------------------------------------------------------------------------------------------------------------------------------------------------------------------------------------------------------------------------------------------------------------------------------------------------------------------------------------------------------------------------------------------------------------------------------------------------------------------------------------------------------------------------------------------------------------------------|---------|
| Search                                        | Query                                                                                                                                                                                                                                                                                                                                                                                                                                                                                                                                                                                                                                                                                                                                                                                                                                                                                                                                                                                                                                                                                                                                                                                                                                                                                                                                                                                                                                                                                                                                                                                                                                                                                                                                                                                                                                                                                                                                                                                                                                                                                                                                                       | Items   |
| #1                                            | ((MH "Nursing Home Patients") OR (MH "Home Nursing") OR (MH "Nursing Homes") OR (MH "Residential Care") OR (MH "Housing for the Elderly") OR (MH "Long Term Care") OR (MH "Skilled Nursing Facilities") OR (MH "Residential Facilities") OR TI ("Nursing home*" OR "Geriatric home*" OR "Care home*" OR "care facilit*" OR "skilled nursing facilit*" OR "residential facilit*" OR "home* for aged" OR "long-term care*" OR "long term care*" OR "residential home*" OR "assisted living facilit*" OR "institutional care" OR "retirement home*" OR "retirement centre" OR "retirement center" OR "old people home" OR "old people homes" OR "continuing care" OR "Medical home*" OR "Medical care" OR "senior residence facility*") OR AB ("Nursing home*" OR "Geriatric home*" OR "Care home*" OR "care facilit*" OR "skilled nursing facilit*" OR "residential facilit*" OR "home* for aged" OR "long-term care*" OR "long term care*" OR "residential home*" OR "assisted living facilit*" OR "institutional care" OR "retirement home*" OR "retirement centre" OR "retirement center" OR "old people home" OR "old people homes" OR "continuing care" OR "Medical home*" OR "Medical care" OR "senior residence facility*"))                                                                                                                                                                                                                                                                                                                                                                                                                                                                                                                                                                                                                                                                                                                                                                                                                                                                                                                           | 128,129 |
| #2                                            | ((MH "Quality Improvement+") OR (MH "Evaluation and Quality Improvement Program") OR (MH "Quality Management, Organizational") OR (MH "Quality Assurance") OR (MH "Quality Circles") OR (MH "Clinical Governance") OR (MH "Program Evaluation") OR (MH "Outcome Assessment") OR (MH "Process Assessment (Health Care)") OR TI ("Quality improvement*" OR "Improvement quality" OR "Health care quality assurance" OR "Health-care quality assurance" OR "Quality assurance" OR "Organizational innovation" OR "Outcome assessment" OR "Process assessment" OR "program evaluation" OR "Program effectiveness" OR "Quality management" OR "Management, total quality" OR "Clinical Governance" OR "Outcome measure" OR "Health Care Process Assessment" OR "Healthcare Process Assessment" OR TQM OR "Plan Do Study Act" OR PDSA OR "Plan Do Check Act" OR PDCA OR "Six Sigma" OR Lean OR DMAIC OR DMADV "Continuous Quality Improvement" OR CQI OR "Focus Analyse Develop Execute" OR FADE OR "Collaborative Quality Improvement" OR "Quality Improvement Collaborative") OR AB ("Quality improvement*" OR "Improvement quality" OR "Health care quality assurance" OR "Health-care quality assurance" OR "Quality assurance" OR "Organizational innovation" OR "Outcome assessment" OR "Process assessment" OR "program evaluation" OR "Program effectiveness" OR "Quality management" OR "Management, total quality" OR "Clinical Governance" OR "Outcome measure" OR "Health Care Process Assessment" OR "Healthcare Process Assessment" OR TQM OR "Plan Do Study Act" OR PDSA OR "Plan Do Check Act" OR PDCA OR "Six Sigma" OR Lean OR DMAIC OR DMADV "Continuous Quality Improvement" OR CQI OR "Focus Analyse Develop Execute" OR FADE OR "Collaborative Quality Improvement" OR "Quality Improvement Collaborative" OR (MH "Implementation Science") OR "implementation science" OR (MH "Program Implementation") OR (MH "Systems Implementation") OR (MH "Root Cause Analysis") OR "implementation" OR (MH "Organizational Development") OR (MH "Audit") OR (MH "Change Management") OR (MH "Organizational Change") OR "Local consensus process")) | 393,141 |
| #3                                            | ((MH "Emergency Service") OR (MH "Hospitalization") OR (MH "Aged, Hospitalized") OR (MH "Hospitals") OR (MH "Patient Admission") OR (MH "Observation Units") OR                                                                                                                                                                                                                                                                                                                                                                                                                                                                                                                                                                                                                                                                                                                                                                                                                                                                                                                                                                                                                                                                                                                                                                                                                                                                                                                                                                                                                                                                                                                                                                                                                                                                                                                                                                                                                                                                                                                                                                                             | 432,718 |

|    |                                                                                                                                                                                                                                                                                                                                                                                                                                                                                                                                                                                                                                                                                                                                                                                                                                                                                                                                                                                                                                                                                                                                                                                                                                                                                                                                                                |             |
|----|----------------------------------------------------------------------------------------------------------------------------------------------------------------------------------------------------------------------------------------------------------------------------------------------------------------------------------------------------------------------------------------------------------------------------------------------------------------------------------------------------------------------------------------------------------------------------------------------------------------------------------------------------------------------------------------------------------------------------------------------------------------------------------------------------------------------------------------------------------------------------------------------------------------------------------------------------------------------------------------------------------------------------------------------------------------------------------------------------------------------------------------------------------------------------------------------------------------------------------------------------------------------------------------------------------------------------------------------------------------|-------------|
|    | (MH "Readmission") OR (MH "Transfer, Discharge") OR (MH "Emergency Treatment" OR (MH "Transitional Care") OR TI ("Hospital Emergency Service*" OR "Emergency Hospital Service*" OR "Emergency unit*" OR "Unit* Emergency" OR "Emergency Ward*" OR "Ward* Emergency" OR "Emergency Department*" OR "Room Emergency" OR "Emergency Room*" OR "Department* Emergency" OR "Patient Admission" OR "Admission*" OR "Hospitalization" OR Hospitali* OR "Hospital Transfer*" OR "Hospital Admittance" OR "Hospital Stay" OR "Patient Readmission" OR Readmission* OR "Patient Transfer" OR "Emergency Treatment" OR "Acute care" OR "Emergency care" OR "Critical care" OR "Acute service*" OR "Emergency service*" OR "Critical service*") OR AB ("Hospital Emergency Service*" OR "Emergency Hospital Service*" OR "Emergency unit*" OR "Unit* Emergency" OR "Emergency Ward*" OR "Ward* Emergency" OR "Emergency Department*" OR "Room Emergency" OR "Emergency Room*" OR "Department* Emergency" OR "Patient Admission" OR "Admission*" OR "Hospitalization" OR Hospitali* OR "Hospital Transfer*" OR "Hospital Admittance" OR "Hospital Stay" OR "Patient Readmission" OR Readmission* OR "Patient Transfer" OR "Emergency Treatment" OR "Acute care" OR "Emergency care" OR "Critical care" OR "Acute service*" OR "Emergency service*" OR "Critical service*")) |             |
| #4 | #1 AND #2 AND #3 AND (Published Date: 20000101-20221231)                                                                                                                                                                                                                                                                                                                                                                                                                                                                                                                                                                                                                                                                                                                                                                                                                                                                                                                                                                                                                                                                                                                                                                                                                                                                                                       | <b>3270</b> |

| EMBASE (Searched 31 <sup>th</sup> December 2022) |                                                                                                                                                                                                                                                                                                                                                                                                                                                                                                                                                                                                                                                                                                                                                                                                                                                                                                                                                                                                                                                                                                                                                                                                                                                                                                                                                                                                                                                                                                                                                                                                                                                                                                                                                                                                                                         |           |
|--------------------------------------------------|-----------------------------------------------------------------------------------------------------------------------------------------------------------------------------------------------------------------------------------------------------------------------------------------------------------------------------------------------------------------------------------------------------------------------------------------------------------------------------------------------------------------------------------------------------------------------------------------------------------------------------------------------------------------------------------------------------------------------------------------------------------------------------------------------------------------------------------------------------------------------------------------------------------------------------------------------------------------------------------------------------------------------------------------------------------------------------------------------------------------------------------------------------------------------------------------------------------------------------------------------------------------------------------------------------------------------------------------------------------------------------------------------------------------------------------------------------------------------------------------------------------------------------------------------------------------------------------------------------------------------------------------------------------------------------------------------------------------------------------------------------------------------------------------------------------------------------------------|-----------|
| Search                                           | Query                                                                                                                                                                                                                                                                                                                                                                                                                                                                                                                                                                                                                                                                                                                                                                                                                                                                                                                                                                                                                                                                                                                                                                                                                                                                                                                                                                                                                                                                                                                                                                                                                                                                                                                                                                                                                                   | Items     |
| #1                                               | ('nursing home'/exp OR 'extended care facility':ti,ab,kw OR 'intermediate care facilities':ti,ab,kw OR 'long term care facility':ti,ab,kw OR 'nursing home':ti,ab,kw OR 'nursing homes':ti,ab,kw OR 'skilled nursing facilities':ti,ab,kw OR 'skilled nursing facility':ti,ab,kw OR 'nursing home patient'/mj OR 'long term care patient':ti,ab,kw OR 'nursing home patient':ti,ab,kw OR 'nursing home resident':ti,ab,kw OR 'residential home'/mj OR 'institution, residential':ti,ab,kw OR 'residential facilities':ti,ab,kw OR 'residential home':ti,ab,kw OR 'residential institution':ti,ab,kw OR 'home for the aged'/mj OR 'continuing care retirement center':ti,ab,kw OR 'geriatric homes':ti,ab,kw OR 'home for the aged':ti,ab,kw OR 'home for the elderly':ti,ab,kw OR 'homes for the aged':ti,ab,kw OR 'housing for the elderly':ti,ab,kw OR 'old age home':ti,ab,kw OR 'old age homes':ti,ab,kw OR 'old people home':ti,ab,kw OR 'old people's home':ti,ab,kw OR 'retirement center':ti,ab,kw OR 'retirement centre':ti,ab,kw OR 'retirement home':ti,ab,kw OR 'senior residence facility':ti,ab,kw OR 'long term care'/mj OR 'chronic treatment':ti,ab,kw OR 'long term care':ti,ab,kw OR 'long term medical care':ti,ab,kw OR 'long-term care':ti,ab,kw OR 'treatment, long term':ti,ab,kw OR 'assisted living facility'/mj OR 'assisted living':ti,ab,kw OR 'assisted living facilities':ti,ab,kw OR 'assisted living facility':ti,ab,kw OR 'institutional care'/mj OR 'care, institutional':ti,ab,kw OR 'institutional care':ti,ab,kw OR 'institutional practice':ti,ab,kw OR 'institutional therapy':ti,ab,kw OR 'institutional treatment':ti,ab,kw OR 'continuing care':ti,ab OR 'extended care':ti,ab,kw OR 'restorative care':ti,ab,kw OR 'skilled care':ti,ab,kw OR 'medical home'/mj OR 'institutional care'/mj) | 152,919   |
| #2                                               | ('quality improvement':ti,ab,kw OR 'quality improvements':ti,ab,kw OR 'total quality management'/exp OR 'quality management':ti,ab,kw OR 'total quality management':ti,ab,kw OR 'management, total quality':ti,ab,kw OR 'quality improvement study'/exp OR 'organisational innovation':ti,ab,kw OR 'organizational innovation':ti,ab,kw OR 'quality control'/mj OR 'quality assessment':ti,ab,kw OR 'quality assurance':ti,ab,kw OR 'quality control':ti,ab,kw OR 'clinical governance':ti,ab,kw OR 'health care evaluation':ti,ab,kw OR 'health care quality assurance':ti,ab,kw OR 'healthcare evaluation':ti,ab,kw OR 'healthcare process assessment':ti,ab,kw OR 'healthcare quality assurance':ti,ab,kw OR 'quality assurance, health care':ti,ab,kw OR 'management quality circles':ti,ab,kw OR tqm:ti,ab OR 'plan do study act cycle'/exp OR pdsa:ti,ab OR 'plan do check act':ti,ab OR 'six sigma methodology'/exp OR 'six sigma':ti,ab,kw OR 'six sigma methodology':ti,ab,kw OR 'lean methodology'/exp OR 'lean initiative':ti,ab,kw OR 'lean management':ti,ab,kw OR 'lean methodology':ti,ab,kw OR 'lean philosophy':ti,ab,kw OR 'lean quality improvement':ti,ab,kw OR 'lean quality initiative':ti,ab,kw OR 'lean thinking':ti,ab,kw OR dmaic:ti,ab OR dmadv:ti,ab OR pdca:ti,ab OR 'continuous quality improvement'/exp OR cqi:ti,ab OR 'focus analyze develop execute':ti,ab OR ciq:ti,ab                                                                                                                                                                                                                                                                                                                                                                                                                               | 1,278,108 |

|    |                                                                                                                                                                                                                                                                                                                                                                                                                                                                                                                                                                                                                                                                                                                                                                                                                                                                                                                                                                                                                                                                                                                                                                                                                                                                                                               |           |
|----|---------------------------------------------------------------------------------------------------------------------------------------------------------------------------------------------------------------------------------------------------------------------------------------------------------------------------------------------------------------------------------------------------------------------------------------------------------------------------------------------------------------------------------------------------------------------------------------------------------------------------------------------------------------------------------------------------------------------------------------------------------------------------------------------------------------------------------------------------------------------------------------------------------------------------------------------------------------------------------------------------------------------------------------------------------------------------------------------------------------------------------------------------------------------------------------------------------------------------------------------------------------------------------------------------------------|-----------|
|    | OR 'collaborative quality improvement*':ti,ab OR 'performance improvement'/exp OR 'collaborative improvement':ti,ab OR 'outcome assessment'/mj OR 'health care outcome assessment':ti,ab,kw OR 'healthcare outcome assessment':ti,ab,kw OR 'outcome assessment':ti,ab,kw OR 'outcome assessment (health care)':ti,ab,kw OR 'outcome assessment, health care':ti,ab,kw OR 'outcome measurement':ti,ab,kw OR 'implementation science'/exp OR 'implementation'/mj OR 'adoption'/mj OR 'education'/mj OR 'education':ti,ab,kw OR 'self-evaluation programmes':ti,ab,kw OR 'self-evaluation programs':ti,ab,kw OR 'training support':ti,ab,kw OR 'local consensus process':ti,ab,kw OR 'professional development'/mj OR 'professional development':ti,ab,kw OR 'feedback system'/mj OR 'change management'/mj OR 'root cause analysis'/mj OR 'leadership'/mj OR 'leader':ti,ab,kw OR 'leadership':ti,ab,kw)                                                                                                                                                                                                                                                                                                                                                                                                        |           |
| #3 | ('hospital readmission'/exp OR 'hospital readmission':ti,ab,kw OR 'patient readmission':ti,ab,kw OR 'readmission':ti,ab,kw OR 'readmission rate':ti,ab,kw OR 'readmissions':ti,ab,kw OR 'rehospitalization':ti,ab,kw OR 'hospital admission'/exp OR 'admission, hospital':ti,ab,kw OR 'hospital admission':ti,ab,kw OR 'hospital admittance':ti,ab,kw OR 'hospital admitting department':ti,ab,kw OR 'hospital admitting service':ti,ab,kw OR 'hospital admitting unit':ti,ab,kw OR 'patient admission':ti,ab,kw OR 'hospitalization'/exp OR 'hospital stay':ti,ab,kw OR 'hospitalization':ti,ab,kw OR 'short stay hospitalization':ti,ab,kw OR 'emergency health service'/mj OR 'emergency health service'/exp/mj OR 'emergency medical service':ti,ab,kw OR 'emergency medical services':ti,ab,kw OR 'emergency service':ti,ab,kw OR 'patient transport'/mj OR 'patient transfer':ti,ab,kw OR 'patient transport':ti,ab,kw OR 'transport, patient':ti,ab,kw OR 'transportation of patients':ti,ab,kw OR 'Emergency Department*':ti,ab,kw OR 'Emergency Room*':ti,ab,kw OR 'Emergency ward*':ti,ab,kw OR 'emergency care'/mj OR 'acute care':ti,ab,kw OR 'acute medical care':ti,ab,kw OR 'emergency care':ti,ab,kw OR 'transitional care'/mj OR 'transition care':ti,ab,kw OR 'transitional care':ti,ab,kw) | 1,184,917 |
| #4 | #1 AND #2 AND #3 AND [2000-2022]/py                                                                                                                                                                                                                                                                                                                                                                                                                                                                                                                                                                                                                                                                                                                                                                                                                                                                                                                                                                                                                                                                                                                                                                                                                                                                           | 2,326     |

| The Cochrane Library (Trials database) (Searched 31 <sup>th</sup> December 2022) |                                                                                                                                                                                                                                                                                                                                                                                                                                                                                                                                                                                                                                                                                                                                                                                                                                                                                                                                                                           |         |
|----------------------------------------------------------------------------------|---------------------------------------------------------------------------------------------------------------------------------------------------------------------------------------------------------------------------------------------------------------------------------------------------------------------------------------------------------------------------------------------------------------------------------------------------------------------------------------------------------------------------------------------------------------------------------------------------------------------------------------------------------------------------------------------------------------------------------------------------------------------------------------------------------------------------------------------------------------------------------------------------------------------------------------------------------------------------|---------|
| Search                                                                           | Query                                                                                                                                                                                                                                                                                                                                                                                                                                                                                                                                                                                                                                                                                                                                                                                                                                                                                                                                                                     | Items   |
| #1                                                                               | ("Nursing home*" OR "Geriatric home*" OR "Care home*" OR "care facilit*" OR "skilled nursing facilit*" OR "residential facilit*" OR "homes for aged" OR "long-term care*" OR "long term care*" OR "residential home*" OR "assisted living facilit*" OR "institutional care" OR "retirement home*" OR "retirement centre" OR "retirement center" OR "old people home" OR "old people homes" OR "continuing care" OR "Medical home" OR "Medical homes" OR "Medical care" OR "senior residence facilit*") in Title Abstract Keyword                                                                                                                                                                                                                                                                                                                                                                                                                                          | 25,298  |
| #2                                                                               | ("Quality improvement*" OR "Improvement quality" OR "Health care quality assurance" OR "Health-care quality assurance" OR "Quality assurance" OR "Organizational innovation" OR "Outcome assessment" OR "Process assessment" OR "program evaluation" OR "Program effectiveness" OR "Quality management" OR "Management, total quality" OR "Clinical Governance" OR "Outcome measure" OR "Health Care Process Assessment" OR "Healthcare Process Assessment" OR TQM OR "Plan Do Study Act" OR PDSA OR "Plan Do Check Act" OR PDCA OR "Six Sigma" OR Lean OR DMAIC OR DMADV OR "Continuous Quality Improvement" OR CQI OR "Focus Analyse Develop Execute" OR FADE OR "Collaborative Quality Improvement" OR "Quality Improvement Collaborative" OR Implement* OR Adopt* OR "Change management" OR "Workforce development" OR "professional development" OR feedback OR audit OR "Root cause analysis" OR "Local consensus process" OR leadership) in Title Abstract Keyword | 251,531 |
| #3                                                                               | ("Hospital Emergency Service*" OR "Emergency Hospital Service*" OR "Emergency unit*" OR "Unit Emergency" OR "Emergency Ward*" OR "Ward Emergency" OR "Emergency Department*" OR "Room Emergency" OR "Emergency Room*" OR "Department Emergency" OR "Patient Admission" OR Admission* OR "Hospitalization" OR Hospital* OR "Hospital Transfer*" OR                                                                                                                                                                                                                                                                                                                                                                                                                                                                                                                                                                                                                         | 235,675 |

|    |                                                                                                                                                                                                                                                                                       |       |
|----|---------------------------------------------------------------------------------------------------------------------------------------------------------------------------------------------------------------------------------------------------------------------------------------|-------|
|    | "Hospital Admittance" OR "Hospital Stay" OR "Patient Readmission" OR Readmission* OR "Patient Transfer" OR "Emergency Treatment" OR "Acute care" OR "Emergency care" OR "Critical care" OR "Acute service*" OR "Emergency service*" OR "Critical service*") in Title Abstract Keyword |       |
| #4 | #1 AND #2 AND #3 AND                                                                                                                                                                                                                                                                  | 2,790 |

| Web of science (Searched 31th December 2022) |                                                                                                                                                                                                                                                                                                                                                                                                                                                                                                                                                                                                                                                                                                                                                                                                                                                                                                                                                                                                                                                                                                                                                                                                                                                                                                                                                                                                                                                                                                                                                                                              |           |
|----------------------------------------------|----------------------------------------------------------------------------------------------------------------------------------------------------------------------------------------------------------------------------------------------------------------------------------------------------------------------------------------------------------------------------------------------------------------------------------------------------------------------------------------------------------------------------------------------------------------------------------------------------------------------------------------------------------------------------------------------------------------------------------------------------------------------------------------------------------------------------------------------------------------------------------------------------------------------------------------------------------------------------------------------------------------------------------------------------------------------------------------------------------------------------------------------------------------------------------------------------------------------------------------------------------------------------------------------------------------------------------------------------------------------------------------------------------------------------------------------------------------------------------------------------------------------------------------------------------------------------------------------|-----------|
| Search                                       | Query                                                                                                                                                                                                                                                                                                                                                                                                                                                                                                                                                                                                                                                                                                                                                                                                                                                                                                                                                                                                                                                                                                                                                                                                                                                                                                                                                                                                                                                                                                                                                                                        | Items     |
| #1                                           | TI=("Nursing home*" OR "Geriatric home*" OR "Care home*" OR "care facilit*" OR "skilled nursing facilit*" OR "residential facilit*" OR "home* for aged" OR "long-term care*" OR "long term care*" OR "residential home*" OR "assisted living facilit*" OR "institutional care" OR "retirement home*" OR "retirement centre" OR "retirement center" OR "old people home" OR "old people homes" OR "continuing care" OR "Medical home*" OR "Medical care" OR "senior residence facility*") OR AB=("Nursing home*" OR "Geriatric home*" OR "Care home*" OR "care facilit*" OR "skilled nursing facilit*" OR "residential facilit*" OR "home* for aged" OR "long-term care*" OR "long term care*" OR "residential home*" OR "assisted living facilit*" OR "institutional care" OR "retirement home*" OR "retirement centre" OR "retirement center" OR "old people home" OR "old people homes" OR "continuing care" OR "Medical home*" OR "Medical care" OR "senior residence facility*")                                                                                                                                                                                                                                                                                                                                                                                                                                                                                                                                                                                                         | 126,846   |
| #2                                           | TI=("Quality improvement*" OR "Improvement quality" OR "Health care quality assurance" OR "Health-care quality assurance" OR "Quality assurance" OR "Organizational innovation" OR "Outcome assessment" OR "Process assessment" OR "program evaluation" OR "Program effectiveness" OR "Quality management" OR "Management, total quality" OR "Clinical Governance" OR "Outcome measure" OR "Health Care Process Assessment" OR "Healthcare Process Assessment" OR TQM OR "Plan Do Study Act" OR PDSA OR "Plan Do Check Act" OR PDCA OR "Six Sigma" OR Lean OR DMAIC OR DMADV OR "Continuous Quality Improvement" OR CQI OR "Focus Analyse Develop Execute" OR FADE OR "Collaborative Quality Improvement" OR "Quality Improvement Collaborative" OR "Implementation" OR "Change management") OR AB=("Quality improvement*" OR "Improvement quality" OR "Health care quality assurance" OR "Health-care quality assurance" OR "Quality assurance" OR "Organizational innovation" OR "Outcome assessment" OR "Process assessment" OR "program evaluation" OR "Program effectiveness" OR "Quality management" OR "Management, total quality" OR "Clinical Governance" OR "Outcome measure" OR "Health Care Process Assessment" OR "Healthcare Process Assessment" OR TQM OR "Plan Do Study Act" OR PDSA OR "Plan Do Check Act" OR PDCA OR "Six Sigma" OR Lean OR DMAIC OR DMADV OR "Continuous Quality Improvement" OR CQI OR "Focus Analyse Develop Execute" OR FADE OR "Collaborative Quality Improvement" OR "Quality Improvement Collaborative" OR "Implementation" OR "Change management") | 1,394,815 |
| #3                                           | TI=("Hospital Emergency Service*" OR "Emergency Hospital Service*" OR "Emergency unit*" OR "Unit* Emergency" OR "Emergency Ward*" OR "Ward* Emergency" OR "Emergency Department*" OR "Room Emergency" OR "Emergency Room*" OR "Department* Emergency" OR "Patient Admission" OR Admission* OR "Hospitalization" OR Hospitali* OR "Hospital Transfer*" OR "Hospital Admittance" OR "Hospital Stay" OR "Patient Readmission" OR Readmission* OR "Patient Transfer" OR "Emergency Treatment" OR "Acute care" OR "Emergency care" OR "Critical care" OR "Acute service*" OR "Emergency service*" OR "Critical service*") OR AB=("Hospital Emergency Service*" OR "Emergency Hospital Service*" OR "Emergency unit*" OR "Unit* Emergency" OR "Emergency Ward*" OR "Ward* Emergency" OR "Emergency Department*" OR "Room Emergency" OR "Emergency Room*" OR "Department* Emergency" OR "Patient Admission" OR Admission* OR "Hospitalization" OR Hospitali* OR "Hospital Transfer*" OR "Hospital Admittance" OR "Hospital Stay" OR "Patient Readmission" OR Readmission* OR "Patient Transfer" OR "Emergency Treatment" OR "Acute care" OR "Emergency care" OR "Critical care" OR "Acute service*" OR "Emergency service*" OR "Critical service*")                                                                                                                                                                                                                                                                                                                                                 | 729,489   |
| #4                                           | #1 AND #2 AND #3 AND Timespan: 2000-01-01 to 2022-12-31 (Index Date)                                                                                                                                                                                                                                                                                                                                                                                                                                                                                                                                                                                                                                                                                                                                                                                                                                                                                                                                                                                                                                                                                                                                                                                                                                                                                                                                                                                                                                                                                                                         | 2007      |
